# Supplementary material for: Microbial Processing of Jellyfish Detritus in the Ocean
Source: Front Microbiol. 2020 Oct 30;11:590995. doi: 10.3389/fmicb.2020.590995 (PMC7662693; doi:10.3389/fmicb.2020.590995)
Supplement: Supplementary file 1 [file Data_Sheet_1.zip › Supplementary Material/Supplementary Material_TableS5.xlsx]

## Sheet: S5A)JellyOM total protein pool
Aurelia aurita transcriptome (Berkhman et al., 2015)			in jellyOM at 0h
Transcript.Seq	Protein ID	Blast annotation	PSM/AA
comp1050040_c0_seq1	GBRG01191905.1	NA	0.00313725
comp105542_c0_seq1	GBRG01016958.1	NA	0.00361011
comp10906_c0_seq1	GBRG01004023.1	NA	0.0027137
comp115383_c0_seq1	GBRG01017786.1	NA	0.0542169
comp115383_c0_seq2	GBRG01017787.1	NA	0.0285714
comp116258_c0_seq1	GBRG01017839.1	NA	0.0384615
comp117505_c0_seq1	GBRG01251886.1	40s ribosomal protein s29	0.0114613
comp117531_c0_seq1	GBRG01251885.1	60s acidic ribosomal protein p1-like	0.0322997
comp117531_c0_seq2	GBRG01251884.1	60s acidic ribosomal protein p1-like	0.0327654
comp117560_c0_seq1	GBRG01017944.1	heat shock factor binding protein 1	0.00443787
comp117605_c0_seq1	GBRG01017956.1	protein	0.00554939
comp117605_c1_seq1	GBRG01251615.1	60s ribosomal protein l38	0.07
comp117742_c0_seq1	GBRG01251882.1	sec61 beta subunit	0.0357895
comp117774_c0_seq1	GBRG01251565.1	60s ribosomal protein l9-like	0.0707372
comp117781_c0_seq1	GBRG01251839.1	60s ribosomal protein l6-like	0.169345
comp117802_c0_seq1	GBRG01251881.1	ribosomal protein s15a	0.158004
comp117865_c0_seq1	GBRG01251880.1	mitochondrial import inner membrane translocase subunit tim13	0.0446602
comp117890_c0_seq1	GBRG01251879.1	ribosomal protein s26	0.300589
comp118103_c0_seq1	GBRG01018106.1	atpase inhibitor mai- mitochondrial-like	0.0116788
comp118204_c0_seq1	GBRG01000005.1	actin-related protein 2 3 complex subunit 4	0.0249716
comp118232_c0_seq1	GBRG01251878.1	atp-binding cassette sub-family f member 1	0.0041511
comp119265_c0_seq1	GBRG01018473.1	NA	0.00106952
comp119363_c0_seq1	GBRG01018502.1	protein	0.0968531
comp120060_c0_seq1	GBRG01018702.1	NA	0.000968054
comp120613_c0_seq1	GBRG01018850.1	predicted protein	0.00113443
comp120971_c0_seq1	GBRG01018967.1	plasminogen precursor	0.0383244
comp1217473_c0_seq1	GBRG01193050.1	NA	0.00285442
comp122780_c0_seq1	GBRG01019454.1	numb protein	0.00566751
comp1231180_c0_seq1	GBRG01193137.1	NA	0.00413223
comp1243613_c0_seq1	GBRG01193193.1	NA	0.00384615
comp127250_c0_seq2	GBRG01020649.1	NA	0.00215983
comp12832_c1_seq1	GBRG01004463.1	NA	0.0223214
comp129367_c0_seq1	GBRG01021226.1	NA	0.00347625
comp129810_c2_seq1	GBRG01021374.1	NA	0.00530705
comp130252_c0_seq1	GBRG01021513.1	NA	0.042042
comp130834_c0_seq1	GBRG01021683.1	NA	0.056
comp132411_c0_seq1	GBRG01022162.1	NA	0.00847458
comp1348614_c0_seq1	GBRG01194055.1	NA	0.0160183
comp135630_c0_seq1	GBRG01023172.1	NA	0.00174825
comp135630_c0_seq2	GBRG01023173.1	NA	0.00178891
comp1361210_c0_seq1	GBRG01194160.1	NA	0.00977199
comp137677_c0_seq1	GBRG01023769.1	NA	0.035473
comp140646_c0_seq1	GBRG01024634.1	NA	0.206587
comp141737_c1_seq1	GBRG01024948.1	NA	0.00743494
comp142371_c0_seq1	GBRG01025109.1	NA	0.0398671
comp142416_c1_seq1	GBRG01025124.1	NA	0.00819672
comp146268_c0_seq1	GBRG01026270.1	NA	0.00829876
comp146681_c0_seq1	GBRG01026394.1	NA	0.00412371
comp147715_c0_seq1	GBRG01026670.1	NA	0.0390244
comp148157_c0_seq1	GBRG01026787.1	NA	0.0195122
comp150928_c0_seq1	GBRG01000010.1	hypotheticial protein	0.0241287
comp151026_c0_seq1	GBRG01000013.1	60s ribosomal protein l35	0.0307018
comp151032_c0_seq1	GBRG01251749.1	ribosomal protein l22	0.323404
comp151041_c0_seq1	GBRG01251874.1	60s ribosomal protein l30	0.0378151
comp151123_c0_seq1	GBRG01251873.1	protein transport protein sec61 subunit gamma	0.00692841
comp151376_c0_seq1	GBRG01027795.1	3-hydroxyisobutyryl- mitochondrial	0.00831444
comp151376_c0_seq2	GBRG01027796.1	3-hydroxyisobutyryl- mitochondrial	0.00840979
comp151538_c0_seq1	GBRG01027886.1	riboflavin-binding protein	0.0342052
comp151579_c0_seq1	GBRG01027911.1	cubilin precursor	0.0602606
comp151684_c0_seq1	GBRG01027983.1	NA	0.00495458
comp151842_c0_seq1	GBRG01028067.1	NA	0.00753769
comp151842_c0_seq2	GBRG01028068.1	NA	0.00950872
comp151956_c0_seq1	GBRG01028119.1	NA	0.00325203
comp151984_c0_seq1	GBRG01028140.1	isoform cra_a	0.0059448
comp152821_c1_seq1	GBRG01028591.1	histone h2a	0.170213
comp152858_c0_seq1	GBRG01028609.1	protein	0.267675
comp153166_c0_seq1	GBRG01028760.1	NA	0.148876
comp153824_c0_seq1	GBRG01029106.1	NA	0.0115385
comp153864_c0_seq1	GBRG01029122.1	NA	0.00638978
comp153881_c1_seq1	GBRG01029130.1	NA	0.0989761
comp154101_c0_seq1	GBRG01029236.1	NA	0.00105319
comp154101_c0_seq2	GBRG01029237.1	NA	0.00105319
comp154101_c1_seq1	GBRG01029238.1	regulator of calcineurin 1	0.00119976
comp155089_c0_seq1	GBRG01029745.1	nfu1 iron-sulfur cluster scaffold mitochondrial-like	0.0121457
comp155308_c0_seq1	GBRG01029853.1	protein	0.0737705
comp155356_c0_seq1	GBRG01029888.1	protein jagunal homolog 1	0.0016247
comp155518_c3_seq1	GBRG01029985.1	zinc metalloproteinase nas-13-like	0.00454545
comp155996_c0_seq1	GBRG01030205.1	NA	0.0931174
comp157076_c0_seq1	GBRG01030669.1	NA	0.00487805
comp158263_c0_seq1	GBRG01031256.1	NA	0.025
comp158565_c0_seq1	GBRG01031376.1	NA	0.00197628
comp158565_c0_seq2	GBRG01031377.1	NA	0.00212766
comp159170_c0_seq1	GBRG01031655.1	NA	0.00119332
comp159817_c0_seq1	GBRG01031948.1	NA	0.00122399
comp159817_c0_seq2	GBRG01031949.1	NA	0.00145349
comp159817_c0_seq3	GBRG01031950.1	NA	0.0014881
comp159966_c0_seq1	GBRG01032010.1	NA	0.00414938
comp161972_c0_seq1	GBRG01032852.1	NA	0.0522088
comp162371_c0_seq1	GBRG01033015.1	surfactant b	0.00395257
comp162549_c0_seq1	GBRG01033091.1	NA	0.0428571
comp163057_c0_seq1	GBRG01033333.1	NA	0.0186782
comp163380_c0_seq1	GBRG01033502.1	NA	0.00304414
comp163736_c0_seq1	GBRG01033677.1	NA	0.0117188
comp164212_c0_seq1	GBRG01033938.1	thioesterase superfamily member 4	0.00188147
comp1642918_c0_seq1	GBRG01197076.1	NA	0.626609
comp165056_c0_seq1	GBRG01034528.1	fucl1_angja ame: full=fucolectin-1 flags: precursor	0.0133333
comp16513_c0_seq1	GBRG01005224.1	NA	0.00203252
comp16513_c0_seq2	GBRG01005225.1	NA	0.00314465
comp1652319_c0_seq1	GBRG01197229.1	NA	0.00490196
comp165372_c0_seq1	GBRG01034761.1	mam domain-containing glycosylphosphatidylinositol anchor protein 1 partial	0.0136054
comp165781_c0_seq1	GBRG01035046.1	histone h1-delta	0.0740291
comp165869_c0_seq1	GBRG01035107.1	polypeptide n-acetylgalactosaminyltransferase 1	0.000392311
comp165908_c0_seq1	GBRG01035139.1	predicted protein [Nematostella vectensis]	0.00183824
comp165994_c0_seq1	GBRG01035206.1	upf0539 protein c7orf59 homolog	0.0018622
comp166032_c0_seq1	GBRG01035240.1	huntingtin-interacting protein k	0.00237248
comp166053_c0_seq1	GBRG01035254.1	NA	0.003544
comp166084_c0_seq1	GBRG01035277.1	NA	0.000748503
comp166115_c1_seq1	GBRG01035299.1	atp-dependent clp protease proteolytic mitochondrial-like	0.00769889
comp166115_c1_seq2	GBRG01035300.1	atp-dependent clp protease proteolytic mitochondrial-like	0.00188147
comp166190_c0_seq1	GBRG01035352.1	snare-associated protein snapin-like	0.00369004
comp166241_c0_seq1	GBRG01035389.1	sco-spondin- partial	0.00886117
comp166538_c0_seq1	GBRG01035614.1	myosin light chain	0.0780856
comp166612_c0_seq1	GBRG01035660.1	protein	0.0126812
comp166615_c0_seq1	GBRG01251869.1	NA	0.000865052
comp166711_c0_seq1	GBRG01035735.1	tubulin beta-2c chain	0.369255
comp166732_c0_seq1	GBRG01251868.1	atp synthase subunit mitochondrial-like	0.00238663
comp166734_c0_seq1	GBRG01000017.1	protein	0.00623886
comp166734_c0_seq2	GBRG01251064.1	NA	0.00197433
comp166734_c0_seq3	GBRG01000018.1	protein	0.00229358
comp166735_c0_seq1	GBRG01251867.1	cytochrome c oxidase subunit mitochondrial-like	0.106299
comp166735_c1_seq1	GBRG01251866.1	cytochrome c oxidase polypeptide vb	0.109608
comp166777_c0_seq1	GBRG01251865.1	profilin	0.00949367
comp166777_c1_seq1	GBRG01251864.1	NA	0.00944386
comp166778_c0_seq1	GBRG01251863.1	eukaryotic translation initiation factor 5a-1	0.0285714
comp166780_c0_seq1	GBRG01251862.1	ribosomal protein s25	0.118367
comp166786_c0_seq1	GBRG01251778.1	elongation factor 1 alpha	0.229567
comp166789_c0_seq1	GBRG01251851.1	ribosomal protein s13	0.127042
comp166795_c0_seq1	GBRG01251848.1	small subunit ribosomal protein 28	0.123684
comp166797_c0_seq1	GBRG01251847.1	ribosomal protein s6	0.180451
comp167079_c0_seq1	GBRG01035972.1	hypothetical protein BATDEDRAFT_90680 [Batrachochytrium dendrobatidis JAM81]	0.00368324
comp167224_c0_seq1	GBRG01036092.1	protein cdv3 homolog	0.00626741
comp168026_c0_seq2	GBRG01036694.1	NA	0.00231481
comp168059_c0_seq1	GBRG01036717.1	histone h4-like	0.300729
comp168468_c0_seq1	GBRG01037013.1	NA	0.0179372
comp168553_c0_seq2	GBRG01037079.1	NA	0.00168067
comp168684_c0_seq1	GBRG01037158.1	NA	0.00677966
comp169100_c0_seq1	GBRG01037469.1	NA	0.00121655
comp169514_c0_seq1	GBRG01037764.1	NA	0.0134529
comp170356_c0_seq1	GBRG01038387.1	NA	0.0412371
comp170541_c0_seq1	GBRG01038546.1	NA	0.0319149
comp170541_c0_seq2	GBRG01038547.1	chymotrypsin-like elastase family member 3b-like	0.0385164
comp170825_c0_seq1	GBRG01038818.1	NA	0.309322
comp170825_c1_seq1	GBRG01038819.1	histone -like	0.319708
comp171182_c0_seq1	GBRG01039164.1	zinc metalloproteinase nas-15-like	0.0310734
comp171592_c0_seq1	GBRG01039559.1	NA	0.00442478
comp171672_c1_seq1	GBRG01039638.1	conserved hypothetical protein	0.0136778
comp171841_c1_seq1	GBRG01039797.1	NA	0.0267857
comp171888_c0_seq1	GBRG01039835.1	3 -5 exonuclease domain-containing protein	0.00195312
comp171894_c0_seq1	GBRG01039841.1	NA	0.17446
comp172167_c0_seq1	GBRG01040141.1	NA	0.000956023
comp172259_c0_seq1	GBRG01040234.1	kazal-type proteinase inhibitor	0.002997
comp172287_c0_seq1	GBRG01040267.1	protein	0.00432526
comp172335_c0_seq1	GBRG01040318.1	ras-related protein rab-7a	0.0516393
comp172349_c0_seq1	GBRG01040333.1	NA	0.00151286
comp172475_c0_seq1	GBRG01040442.1	bola-like protein 3-like	0.00329489
comp172564_c0_seq1	GBRG01040543.1	NA	0.0116822
comp172564_c1_seq1	GBRG01040544.1	ribonuclease uk114	0.0120048
comp172645_c0_seq1	GBRG01040639.1	rnp-1 like rna-binding protein	0.00108108
comp172716_c0_seq1	GBRG01251844.1	s-formylglutathione hydrolase	0.0260452
comp172801_c0_seq1	GBRG01251840.1	betaine--homocysteine s-methyltransferase 1	0.0971787
comp172815_c0_seq1	GBRG01040804.1	NA	0.0560748
comp172816_c0_seq1	GBRG01251845.1	40s ribosomal protein s18	0.336283
comp172820_c0_seq1	GBRG01251777.1	ribosomal protein l31	0.0754098
comp172830_c0_seq1	GBRG01040817.1	ribosomal protein l32	0.101761
comp172844_c0_seq1	GBRG01251838.1	ribosomal protein x-linked	0.288268
comp172845_c0_seq1	GBRG01251793.1	ribosomal protein l34	0.0196078
comp172852_c1_seq1	GBRG01251857.1	40s ribosomal protein s23	0.091858
comp172983_c1_seq1	GBRG01040968.1	nadh dehydrogenase	0.0112108
comp173060_c0_seq1	GBRG01041048.1	protein	0.171192
comp173137_c0_seq1	GBRG01041110.1	prefoldin subunit 1	0.00465116
comp173256_c0_seq1	GBRG01041241.1	NA	0.00119246
comp173324_c0_seq1	GBRG01041303.1	NA	0.00746269
comp173324_c0_seq2	GBRG01041304.1	PREDICTED: uncharacterized protein LOC100201149	0.00877193
comp173340_c0_seq1	GBRG01041319.1	NA	0.256303
comp173503_c2_seq3	GBRG01041483.1	translation elongation factor partial	0.128773
comp173553_c0_seq1	GBRG01041525.1	NA	0.00587372
comp173588_c0_seq1	GBRG01041561.1	NA	0.0134529
comp173836_c0_seq1	GBRG01041810.1	NA	0.00736127
comp173848_c0_seq1	GBRG01041826.1	NA	0.00760456
comp173952_c0_seq1	GBRG01041923.1	zinc transporter	0.00168445
comp173958_c0_seq1	GBRG01041930.1	NA	0.0136364
comp173959_c0_seq1	GBRG01041931.1	myosin light polypeptide 6	0.0163399
comp174196_c0_seq1	GBRG01042205.1	NA	0.00295858
comp174287_c0_seq1	GBRG01042318.1	protein archease-like	0.00325203
comp174485_c0_seq1	GBRG01042584.1	neurocalcin homolog	0.00203252
comp174559_c0_seq1	GBRG01042686.1	NA	0.00298211
comp174845_c0_seq1	GBRG01043034.1	guanine nucleotide-binding protein g alpha subunit	0.00536193
comp174892_c1_seq1	GBRG01043084.1	NA	0.00164204
comp175342_c0_seq1	GBRG01043664.1	tetratricopeptide repeat protein mitochondrial-like	0.00104987
comp175342_c0_seq2	GBRG01043665.1	tetratricopeptide repeat protein mitochondrial-like	0.00124456
comp175460_c0_seq1	GBRG01043826.1	actin-related protein 2 3 complex subunit 2	0.00704846
comp175504_c2_seq1	GBRG01043879.1	serine protease 1	0.0207101
comp175507_c0_seq1	GBRG01251830.1	ribosomal protein l28	0.0529301
comp175508_c1_seq1	GBRG01251829.1	peptidylprolyl isomerase a	0.405172
comp175509_c0_seq1	GBRG01251828.1	ribosomal protein s24	0.061144
comp175525_c0_seq1	GBRG01251823.1	40s ribosomal protein s27	0.153295
comp175526_c1_seq1	GBRG01251849.1	s9 ribosomal protein	0.109955
comp175529_c0_seq1	GBRG01251813.1	ribosomal protein l36	0.0879397
comp175529_c2_seq1	GBRG01251811.1	ribosomal protein l36	0.0879397
comp175530_c0_seq1	GBRG01251821.1	cytochrome c	0.03207
comp175531_c0_seq1	GBRG01251820.1	ribosomal protein l12	0.0797721
comp175532_c0_seq1	GBRG01251819.1	ribosomal protein l11	0.137195
comp175567_c0_seq1	GBRG01251817.1	protein	0.0347448
comp175598_c0_seq1	GBRG01044010.1	cytochrome c oxidase subunit viic	0.00685871
comp175615_c0_seq1	GBRG01000027.1	14-3-3 protein zeta delta	0.0314927
comp175652_c0_seq1	GBRG01044088.1	golgin subfamily a member 6-like protein 1-like isoform 1	0.0102564
comp175768_c0_seq1	GBRG01044264.1	NA	0.00148148
comp175775_c0_seq1	GBRG01044275.1	protein	0.0189474
comp175792_c0_seq1	GBRG01044299.1	NA	0.0134228
comp176087_c0_seq1	GBRG01044685.1	NA	0.0254777
comp176204_c0_seq1	GBRG01044853.1	ras-related protein rab7	0.00239521
comp176681_c0_seq1	GBRG01000029.1	soul heme-binding protein	0.00926784
comp176681_c0_seq2	GBRG01000030.1	soul heme-binding protein	0.0093985
comp176727_c0_seq1	GBRG01251837.1	ribosomal protein l39	0.0274914
comp176729_c0_seq1	GBRG01251636.1	ubiquitin ribosomal protein s27a fusion protein	0.543988
comp176734_c0_seq1	GBRG01251812.1	ribosomal protein l14	0.185118
comp176736_c0_seq1	GBRG01251836.1	ribosomal protein l15	0.0343407
comp176766_c0_seq1	GBRG01251810.1	ribosomal protein l18a	0.0452233
comp176779_c0_seq1	GBRG01251809.1	pmp1 protein	0.0121689
comp176780_c0_seq1	GBRG01251808.1	nhp2-like protein 1	0.00341297
comp176780_c1_seq1	GBRG01251807.1	nhp2 non-histone chromosome protein 2-like 1	0.00398406
comp176804_c0_seq1	GBRG01251806.1	cytochrome c oxidase polypeptide mitochondrial precursor	0.00275735
comp176822_c0_seq1	GBRG01000032.1	splicing arginine serine-rich 7	0.0156962
comp176822_c0_seq2	GBRG01000033.1	splicing arginine serine-rich 7	0.0160372
comp176838_c0_seq1	GBRG01045734.1	myosin light chain	0.00167879
comp176850_c0_seq1	GBRG01045752.1	sequestosome 1-like	0.0017321
comp176858_c0_seq1	GBRG01251805.1	transmembrane protein 214	0.00122951
comp176898_c0_seq1	GBRG01251804.1	actin-related protein 2 3 complex subunit 1a	0.0272459
comp176928_c0_seq1	GBRG01045849.1	phosphatidylinositol transfer protein alpha isoform-like	0.00338123
comp176932_c0_seq1	GBRG01251803.1	eukaryotic translation initiation factor 2 subunit 2	0.00950119
comp176947_c0_seq1	GBRG01045881.1	serine mitochondrial-like	0.011622
comp176959_c0_seq1	GBRG01045897.1	NA	0.043364
comp176959_c0_seq2	GBRG01045898.1	NA	0.0820896
comp176959_c0_seq4	GBRG01045900.1	NA	0.0952381
comp176959_c0_seq5	GBRG01045901.1	NA	0.105437
comp176959_c0_seq6	GBRG01045902.1	NA	0.126482
comp176969_c0_seq1	GBRG01251802.1	14-3-3 zeta	0.0184591
comp176969_c0_seq2	GBRG01251801.1	14-3-3 zeta	0.0184887
comp176982_c0_seq1	GBRG01000034.1	von willebrand factor like partial	0.0123789
comp177008_c0_seq1	GBRG01045980.1	myosin-2 essential light chain	0.0407674
comp177032_c0_seq1	GBRG01046009.1	signal peptidase complex subunit 3	0.00414365
comp177047_c0_seq1	GBRG01046041.1	NA	0.00849257
comp177204_c0_seq1	GBRG01046283.1	hypothetical protein CAPTEDRAFT_113601	0.002457
comp177304_c0_seq1	GBRG01046435.1	calcyphosin-like protein	0.004329
comp177320_c1_seq1	GBRG01046460.1	NA	0.000326904
comp177320_c1_seq3	GBRG01046462.1	nanor b-like	0.000536193
comp177320_c1_seq4	GBRG01046463.1	NA	0.000560224
comp177391_c0_seq1	GBRG01046566.1	h aca ribonucleoprotein complex subunit 1	0.00099108
comp177536_c0_seq1	GBRG01046774.1	tyrosyl-trna synthetase	0.00525762
comp177546_c1_seq1	GBRG01046788.1	protein	0.0075543
comp177570_c0_seq1	GBRG01046814.1	NA	0.00453172
comp177593_c0_seq1	GBRG01046860.1	NA	0.0138249
comp177594_c0_seq1	GBRG01046861.1	NA	0.00229358
comp177594_c0_seq2	GBRG01046862.1	NA	0.00201613
comp177611_c0_seq1	GBRG01046886.1	NA	0.000865801
comp177611_c0_seq2	GBRG01046887.1	NA	0.00114155
comp177813_c0_seq1	GBRG01047176.1	NA	0.00565504
comp177813_c0_seq2	GBRG01047177.1	NA	0.00765306
comp178164_c0_seq1	GBRG01047757.1	myosin light chain 3	0.156511
comp178250_c0_seq1	GBRG01047897.1	NA	0.00920245
comp178250_c0_seq2	GBRG01047898.1	NA	0.00367647
comp178499_c0_seq1	GBRG01048276.1	calponin transgelin	0.0450734
comp178522_c0_seq1	GBRG01048312.1	dynein light chain roadblock-type 2	0.00513347
comp178559_c0_seq1	GBRG01048380.1	wd-40 repeat protein	0.0124626
comp178613_c1_seq1	GBRG01048481.1	run and fyve domain-containing protein 2	0.00131004
comp178668_c0_seq1	GBRG01048573.1	valyl-trna synthetase	0.0105453
comp178673_c1_seq1	GBRG01048578.1	NA	0.000688231
comp178697_c0_seq1	GBRG01048636.1	chronic lymphocytic leukemia deletion region gene 6 protein homolog	0.000791766
comp178783_c0_seq1	GBRG01048810.1	lmp7-like protein	0.0191147
comp178846_c0_seq1	GBRG01048924.1	NA	0.00226757
comp178884_c0_seq1	GBRG01048990.1	bax inhibitor 1-like	0.000860585
comp178884_c1_seq1	GBRG01048991.1	NA	0.000860585
comp178900_c0_seq1	GBRG01049038.1	NA	0.0174672
comp178922_c0_seq1	GBRG01049068.1	NA	0.002
comp178972_c0_seq1	GBRG01049170.1	biogenesis of lysosome-related organelles complex 1 subunit 1-like	0.000335683
comp179005_c0_seq1	GBRG01049216.1	NA	0.000910747
comp179035_c0_seq1	GBRG01049264.1	haloacid dehalogenase-like hydrolase domain containing 1a	0.00527426
comp179047_c1_seq2	GBRG01049286.1	NA	0.00146413
comp179144_c0_seq1	GBRG01049465.1	rna recognition motif-containing protein rrm	0.0144509
comp179216_c0_seq1	GBRG01049593.1	thioredoxin domain-containing protein 9	0.00439078
comp179220_c0_seq1	GBRG01049601.1	phospholipase a2	0.0361011
comp179226_c0_seq1	GBRG01049611.1	peptidyl-prolyl cis-trans isomerase nima-interacting 4-like	0.00817996
comp179262_c0_seq1	GBRG01049667.1	egf-like domain-containing protein	0.0041816
comp179323_c0_seq1	GBRG01049784.1	nucleoporin 93kda	0.00429185
comp179392_c0_seq1	GBRG01049911.1	NA	0.000375235
comp179397_c0_seq1	GBRG01049917.1	NA	0.00689655
comp179410_c1_seq1	GBRG01049939.1	fc fragment of binding protein	0.00289645
comp179448_c0_seq1	GBRG01049999.1	NA	0.0816568
comp179458_c0_seq1	GBRG01050010.1	probable signal peptidase complex subunit 2	0.0011534
comp179463_c0_seq1	GBRG01050023.1	transmembrane protein 111-like	0.00289296
comp179537_c0_seq1	GBRG01251789.1	NA	0.00408998
comp179581_c0_seq1	GBRG01050224.1	glutathione s-transferase	0.00244101
comp179628_c0_seq1	GBRG01050308.1	NA	0.00138696
comp179690_c0_seq1	GBRG01251580.1	translationally controlled tumor protein	0.028133
comp179698_c0_seq1	GBRG01050451.1	small ubiquitin-related modifier 1 precursor	0.0285714
comp179709_c0_seq1	GBRG01251787.1	dynein light chain type	0.0425287
comp179718_c0_seq1	GBRG01251786.1	ferritin	0.0396772
comp179723_c0_seq1	GBRG01251785.1	protein	0.10477
comp179728_c0_seq1	GBRG01050491.1	NA	0.00354251
comp179751_c0_seq1	GBRG01050529.1	PREDICTED: similar to predicted protein, partial [Hydra magnipapillata]	0.0174081
comp179763_c0_seq1	GBRG01251800.1	40s ribosomal protein s21	0.608219
comp179767_c0_seq1	GBRG01251776.1	40s ribosomal protein s17	0.0776119
comp179777_c0_seq1	GBRG01251775.1	ubiquitin a-52 residue ribosomal protein fusion product 1	0.630357
comp179791_c1_seq1	GBRG01050582.1	PREDICTED: uncharacterized protein LOC100892123 [Strongylocentrotus purpuratus]	0.00357995
comp179793_c0_seq1	GBRG01251818.1	ribosomal protein s16	0.0521583
comp179805_c0_seq1	GBRG01251860.1	poly binding cytoplasmic 4 (inducible form)	0.0934809
comp179806_c0_seq1	GBRG01050611.1	myosin light chain 6b-like	0.00598802
comp179840_c0_seq1	GBRG01050665.1	pancreatic lipase-related protein 1	0.00117233
comp179857_c0_seq1	GBRG01050692.1	NA	0.00788288
comp179876_c0_seq1	GBRG01050736.1	glycine-rich rna-binding protein	0.0368497
comp179876_c0_seq2	GBRG01050737.1	glycine-rich rna-binding protein	0.0398749
comp179905_c0_seq1	GBRG01050781.1	testicular haploid expressed gene	0.00070922
comp179929_c0_seq1	GBRG01050828.1	ganglioside gm2 activator-like	0.13764
comp179929_c1_seq1	GBRG01050831.1	ganglioside gm2 activator-like	0.0729167
comp179949_c1_seq1	GBRG01050861.1	3 -5 exonuclease	0.00675676
comp179963_c0_seq1	GBRG01050888.1	tumor suppressor candidate 4	0.000276167
comp180030_c0_seq1	GBRG01051015.1	nuclear factor i c	0.000326797
comp180122_c0_seq1	GBRG01051208.1	NA	0.0266667
comp180176_c0_seq1	GBRG01051311.1	histamine n-methyltransferase	0.000838223
comp180238_c0_seq1	GBRG01051443.1	universal stress protein	0.0191781
comp180241_c0_seq1	GBRG01051449.1	ras-related protein rab-10-like	0.0238871
comp180288_c0_seq1	GBRG01251771.1	26s proteasome non-atpase regulatory subunit 8	0.00834202
comp180294_c0_seq1	GBRG01051557.1	vitamin b6 biosynthesis protein	0.0685279
comp180297_c0_seq1	GBRG01051561.1	ras-related gtp-binding protein d-like	0.00452781
comp180312_c0_seq1	GBRG01051593.1	oncoprotein-induced transcript 3	0.000942507
comp180318_c0_seq1	GBRG01000045.1	mitochondrial import inner membrane translocase subunit tim8 a	0.0388514
comp180325_c0_seq6	GBRG01000046.1	heterogeneous nuclear ribonucleoprotein	0.012792
comp180325_c0_seq7	GBRG01000047.1	NA	0.012792
comp180325_c0_seq8	GBRG01251770.1	heterogeneous nuclear ribonucleoprotein	0.014393
comp180325_c0_seq9	GBRG01251769.1	heterogeneous nuclear ribonucleoprotein	0.014402
comp180415_c0_seq1	GBRG01251927.1	dynein light chain axonemal	0.00116686
comp180481_c0_seq1	GBRG01251502.1	eukaryotic translation initiation factor 1b	0.0136986
comp180521_c0_seq1	GBRG01052068.1	mediator of cell motility 1	0.00187441
comp180534_c1_seq1	GBRG01052090.1	cytochrome b5	0.00166389
comp180534_c1_seq2	GBRG01052091.1	cytochrome b5	0.00175439
comp180571_c0_seq1	GBRG01251765.1	ribosomal protein l19	0.335777
comp180574_c0_seq1	GBRG01251764.1	40s ribosomal protein s10-like	0.0444444
comp180577_c0_seq1	GBRG01052173.1	NA	0.00667854
comp180586_c0_seq1	GBRG01052184.1	nadh dehydrogenase	0.0265152
comp180613_c0_seq1	GBRG01251841.1	atp synthase lipid-binding mitochondrial-like	0.00263505
comp180625_c0_seq1	GBRG01052261.1	h aca ribonucleoprotein complex subunit 2-like protein	0.00796178
comp180646_c0_seq1	GBRG01052303.1	protein	0.00227015
comp180649_c0_seq1	GBRG01052309.1	endothelial differentiation-related factor 1	0.00505561
comp180677_c0_seq1	GBRG01052360.1	probable 28s ribosomal protein mitochondrial-like	0.000843882
comp180677_c0_seq2	GBRG01052361.1	probable 28s ribosomal protein mitochondrial-like	0.00134228
comp180697_c0_seq1	GBRG01052389.1	NA	0.185425
comp180741_c0_seq1	GBRG01000049.1	tektin 3	0.000293255
comp180799_c0_seq1	GBRG01251761.1	40s ribosomal protein s8	0.436997
comp180848_c0_seq1	GBRG01052722.1	cytidylate kinase	0.00998004
comp180852_c0_seq1	GBRG01052735.1	NA	0.00175747
comp180911_c0_seq1	GBRG01251573.1	60s ribosomal protein l23a	0.189097
comp180976_c1_seq1	GBRG01251757.1	60s ribosomal protein l27a	0.0667904
comp180976_c2_seq1	GBRG01251756.1	60s ribosomal protein l27a	0.0642857
comp181069_c0_seq1	GBRG01053176.1	protein	0.000776096
comp181077_c0_seq3	GBRG01251754.1	epididymal secretory protein e1 precursor	0.00026001
comp181077_c0_seq4	GBRG01251753.1	epididymal secretory protein e1 precursor	0.00026001
comp181077_c0_seq7	GBRG01251751.1	epididymal secretory protein e1 precursor	0.000260281
comp181077_c0_seq8	GBRG01251750.1	epididymal secretory protein e1 precursor	0.000260281
comp181096_c0_seq2	GBRG01251748.1	nucleoside diphosphate kinase b	0.606013
comp181100_c0_seq1	GBRG01053244.1	mitogen-activated protein kinase kinase 1-interacting protein 1	0.00857318
comp181110_c0_seq1	GBRG01251746.1	ribosomal protein s7	0.0344388
comp181118_c1_seq1	GBRG01053281.1	nucleolysin tiar-like	0.00223214
comp181130_c0_seq1	GBRG01251745.1	40s ribosomal protein s14	0.173835
comp181171_c0_seq1	GBRG01251663.1	ribosomal protein l24	0.11592
comp181173_c0_seq1	GBRG01053430.1	protein cgmp- type i	0.00735294
comp181175_c0_seq1	GBRG01251742.1	40s ribosomal protein s5	0.128535
comp181182_c0_seq1	GBRG01251780.1	ribosomal protein s3a	0.285388
comp181187_c0_seq1	GBRG01053463.1	NA	0.00529101
comp181197_c0_seq1	GBRG01053482.1	zinc-binding alcohol dehydrogenase domain-containing protein 2	0.00272035
comp181199_c0_seq1	GBRG01053485.1	60s acidic ribosomal protein p2	0.0588235
comp181230_c0_seq1	GBRG01053554.1	NA	0.00123865
comp181237_c0_seq1	GBRG01053569.1	low quality protein: hemicentin-1-like	0.00463822
comp181238_c0_seq1	GBRG01053570.1	eukaryotic translation initiation factor 4e	0.00855826
comp181259_c0_seq1	GBRG01251739.1	cytochrome c oxidase subunit 6b1-like	0.070132
comp181259_c0_seq2	GBRG01251738.1	cytochrome c oxidase subunit 6b1-like	0.0708333
comp181259_c1_seq1	GBRG01251737.1	cytochrome c oxidase subunit 6b1-like	0.070132
comp181259_c1_seq2	GBRG01251736.1	cytochrome c oxidase subunit 6b1-like	0.0708333
comp181308_c0_seq1	GBRG01053695.1	peptidyl-prolyl cis-trans isomerase e-like	0.00384911
comp181310_c0_seq1	GBRG01053700.1	NA	0.00100908
comp181310_c0_seq2	GBRG01053701.1	NA	0.00107991
comp181312_c0_seq1	GBRG01251735.1	histidine triad nucleotide-binding protein 1	0.0580848
comp181337_c0_seq1	GBRG01053757.1	glutaredoxin 2	0.00222222
comp181337_c0_seq2	GBRG01053758.1	NA	0.00234192
comp181364_c0_seq1	GBRG01251733.1	dolichyl-diphosphooligosaccharide--protein glycosyltransferase subunit stt3a	0.00588755
comp181385_c0_seq1	GBRG01053876.1	ubiquitin domain-containing protein ubfd1	0.0016
comp181385_c0_seq2	GBRG01053877.1	ubiquitin domain-containing protein ubfd1	0.00174825
comp181436_c0_seq1	GBRG01054007.1	NA	0.00327154
comp181477_c0_seq1	GBRG01054111.1	NA	0.000687285
comp181478_c0_seq1	GBRG01054112.1	coiled-coil domain-containing protein 58-like	0.0046729
comp181480_c0_seq1	GBRG01054115.1	NA	0.00436681
comp181502_c0_seq1	GBRG01054188.1	nidogen 2 precursor	0.00285225
comp181510_c0_seq1	GBRG01054221.1	protein	0.000969932
comp181545_c0_seq1	GBRG01054309.1	dna replication licensing factor mcm4	0.00263644
comp1815655_c0_seq1	GBRG01199144.1	NA	0.02
comp181603_c0_seq1	GBRG01251792.1	peptidyl-prolyl cis-trans isomerase	0.0209546
comp181645_c0_seq1	GBRG01054572.1	v-type proton atpase 116 kda subunit a isoform 1 isoform a	0.00940767
comp181645_c0_seq2	GBRG01054573.1	v-type proton atpase 116 kda subunit a isoform 1-like isoform 2	0.00959147
comp181751_c0_seq1	GBRG01054842.1	protein bud31 homolog	0.0027137
comp181767_c0_seq1	GBRG01251730.1	selenoprotein p	0.00128949
comp181772_c0_seq1	GBRG01000058.1	phosphoribosylaminoimidazole carboxylase	0.0330319
comp181784_c0_seq1	GBRG01054907.1	pe-pgrs family protein	0.00179211
comp181793_c0_seq1	GBRG01054941.1	prefoldin subunit 6	0.0128205
comp181798_c0_seq1	GBRG01054948.1	von willebrand factor d and egf domain-containing	0.00900901
comp181820_c0_seq1	GBRG01054996.1	glycine cleavage system h mitochondrial-like	0.0042796
comp181828_c0_seq1	GBRG01251729.1	proteasome activator complex subunit 3	0.039823
comp181833_c0_seq1	GBRG01055017.1	NA	0.00104167
comp181833_c0_seq2	GBRG01055018.1	probable protein brick1	0.00290698
comp181931_c0_seq1	GBRG01055233.1	NA	0.00902256
comp181931_c0_seq11	GBRG01055243.1	NA	0.0244755
comp181931_c0_seq15	GBRG01055247.1	protein	0.0224719
comp181931_c0_seq16	GBRG01055248.1	NA	0.0346154
comp181931_c0_seq3	GBRG01055235.1	PREDICTED: uncharacterized protein LOC100209279	0.0334572
comp181931_c0_seq5	GBRG01055237.1	NA	0.0193548
comp181931_c0_seq7	GBRG01055239.1	agrin precursor	0.041791
comp181939_c0_seq1	GBRG01055264.1	selenoprotein m precursor	0.0137931
comp181939_c0_seq2	GBRG01055265.1	selenoprotein m precursor	0.0207254
comp181972_c0_seq1	GBRG01055361.1	quinone oxidoreductase	0.020202
comp181974_c0_seq1	GBRG01055368.1	peroxidasin homolog	0.00129199
comp181990_c1_seq1	GBRG01055399.1	protein	0.0346535
comp182001_c0_seq1	GBRG01055416.1	dj-1 protein	0.0123457
comp182003_c0_seq1	GBRG01251827.1	transcription factor btf3 homolog 4	0.0145808
comp182009_c0_seq1	GBRG01055431.1	proteasome subunit alpha type-2	0.0227758
comp182016_c0_seq1	GBRG01000734.1	ShK domain	0.158835
comp182020_c0_seq2	GBRG01055469.1	NA	0.00131752
comp182036_c0_seq1	GBRG01055533.1	NA	0.00996016
comp182055_c0_seq1	GBRG01055576.1	NA	0.00482426
comp182056_c0_seq1	GBRG01251727.1	cytochrome c oxidase subunit 4 isoform mitochondrial precursor	0.0425868
comp182059_c0_seq1	GBRG01251726.1	atp-binding cassette sub-family f member 2	0.00777454
comp182108_c0_seq1	GBRG01055690.1	tubulin alpha-1a chain- partial	0.23374
comp182108_c0_seq2	GBRG01055691.1	tubulin alpha-1a chain- partial	0.254425
comp182108_c1_seq1	GBRG01055692.1	tubulin alpha-1b chain	0.0571066
comp182116_c0_seq1	GBRG01055707.1	deoxyribonuclease ii	0.00131291
comp182122_c0_seq1	GBRG01251725.1	prohibitin	0.0423926
comp182122_c0_seq2	GBRG01251724.1	prohibitin	0.0426526
comp182133_c0_seq1	GBRG01055742.1	fact complex subunit ssrp1	0.00214746
comp182133_c0_seq2	GBRG01055743.1	NA	0.00131839
comp182174_c0_seq1	GBRG01251722.1	succinyl- ligase	0.0384395
comp182198_c1_seq1	GBRG01056008.1	h2a histone member v	0.186982
comp182201_c0_seq1	GBRG01056014.1	predicted protein	0.00093838
comp182201_c0_seq2	GBRG01056015.1	NA	0.000960615
comp182201_c0_seq3	GBRG01056016.1	NA	0.00555556
comp182201_c0_seq4	GBRG01056017.1	NA	0.00643777
comp182233_c0_seq1	GBRG01000064.1	high mobility group protein homolog tdp-1	0.0276431
comp182233_c0_seq2	GBRG01000065.1	high mobility group protein homolog tdp-1	0.0276431
comp182241_c0_seq1	GBRG01056119.1	u6 snrna-associated sm-like protein lsm6	0.00536481
comp182241_c0_seq2	GBRG01056120.1	u6 snrna-associated sm-like protein lsm6	0.00588235
comp182267_c0_seq1	GBRG01056213.1	kazal-type serine proteinase inhibitor 3	0.0110345
comp182278_c0_seq1	GBRG01056261.1	mitochondrial carnitine acylcarnitine carrier	0.0120482
comp182298_c0_seq1	GBRG01056304.1	NA	0.000745712
comp182316_c0_seq1	GBRG01251721.1	mitochondrial atp synthase o subunit	0.0206659
comp182325_c0_seq1	GBRG01251314.1	clathrin coat assembly protein ap19	0.00111359
comp182333_c0_seq1	GBRG01251720.1	ubiquinol-cytochrome c reductase iron-sulfur subunit	0.00177148
comp182420_c0_seq1	GBRG01056616.1	PREDICTED: hypothetical protein LOC100635635	0.0108247
comp182460_c0_seq1	GBRG01251717.1	syndecan binding protein	0.00258565
comp182476_c0_seq1	GBRG01056745.1	NA	0.0034662
comp182497_c0_seq1	GBRG01056794.1	transmembrane emp24 domain-containing protein 2-like	0.0108696
comp182504_c0_seq1	GBRG01251716.1	f-actin-capping protein subunit beta-like	0.0577406
comp182538_c0_seq1	GBRG01251715.1	ribosomal protein s20	0.03125
comp182538_c1_seq1	GBRG01251714.1	ribosomal protein s20	0.03125
comp182541_c0_seq1	GBRG01056902.1	protein phosphatase 1b isoform 2	0.00333148
comp182590_c0_seq1	GBRG01057027.1	predicted protein	0.000796178
comp182590_c0_seq2	GBRG01057028.1	NA	0.00103093
comp182590_c0_seq3	GBRG01057029.1	NA	0.00107527
comp182624_c0_seq1	GBRG01057100.1	pterin-4-alpha-carbinolamine dehydratase 2-like	0.000800641
comp182634_c0_seq1	GBRG01251713.1	double-stranded rna-binding protein staufen-like protein 2	0.0233723
comp182634_c0_seq2	GBRG01251712.1	double-stranded rna-binding protein staufen-like protein 2	0.0235492
comp182656_c0_seq1	GBRG01057194.1	ubiquitin-like protein 7-like	0.00460476
comp182657_c0_seq1	GBRG01000069.1	ferritin high chain	0.0531335
comp182657_c0_seq2	GBRG01000070.1	ferritin high chain	0.0543554
comp182657_c0_seq3	GBRG01000071.1	ferritin high chain	0.0947752
comp182657_c1_seq1	GBRG01251711.1	ribosomal protein l21	0.0311526
comp182678_c0_seq1	GBRG01251710.1	ribosomal protein s19	0.159049
comp182695_c0_seq1	GBRG01057283.1	nadh dehydrogenase	0.0364742
comp182718_c0_seq1	GBRG01057324.1	barrier-to-autointegration factor	0.00437318
comp182735_c0_seq1	GBRG01251709.1	calmodulin	0.000896057
comp182735_c0_seq2	GBRG01251708.1	calmodulin	0.00127226
comp182772_c0_seq1	GBRG01251707.1	fk506-binding protein 2 precursor	0.0877193
comp182790_c0_seq1	GBRG01057527.1	cytoplasmic actin 1	0.972973
comp182818_c0_seq1	GBRG01000072.1	methyltransferase type 11	0.000745712
comp182830_c0_seq1	GBRG01057626.1	actin-related protein 2 3 complex subunit 5	0.0280749
comp182844_c0_seq1	GBRG01057679.1	gamma-interferon-inducible lysosomal thiol reductase precursor	0.0019802
comp182854_c0_seq1	GBRG01057723.1	trafficking protein particle complex subunit 6b	0.00094697
comp182892_c0_seq1	GBRG01057835.1	NA	0.032345
comp182903_c0_seq1	GBRG01057859.1	t-cell receptor alpha chain	0.00980392
comp182924_c0_seq1	GBRG01057935.1	ccr4-not transcription complex subunit 1	0.0035447
comp182934_c0_seq1	GBRG01057961.1	myotrophin	0.00141044
comp182970_c0_seq1	GBRG01058056.1	3-oxoacyl-acyl-carrier-protein reductase	0.000911577
comp182970_c0_seq2	GBRG01058057.1	3-oxoacyl-acyl-carrier-protein reductase	0.000924214
comp182975_c0_seq1	GBRG01251704.1	ribosomal protein s15	0.0675182
comp182979_c0_seq1	GBRG01058076.1	NA	0.0011409
comp182979_c0_seq2	GBRG01058077.1	NA	0.00115207
comp182981_c4_seq1	GBRG01058085.1	n-acetylated-alpha-linked acidic dipeptidase 2	0.0165652
comp182981_c4_seq2	GBRG01058086.1	n-acetylated-alpha-linked acidic dipeptidase 2-like	0.0055325
comp182982_c0_seq1	GBRG01058091.1	interferon-related developmental regulator 2	0.00123077
comp182998_c0_seq1	GBRG01000073.1	upf0661 tpr repeat-containing	0.00334448
comp183008_c0_seq1	GBRG01058175.1	dna-directed rna polymerase ii subunit rpb9	0.00500626
comp183023_c0_seq1	GBRG01058200.1	proteasome subunit beta type-3	0.0194274
comp183087_c0_seq1	GBRG01058339.1	peroxisomal -trans-enoyl- isomerase	0.0056005
comp183087_c0_seq2	GBRG01058340.1	peroxisomal -trans-enoyl- isomerase	0.00209644
comp183087_c0_seq3	GBRG01058341.1	peroxisomal -trans-enoyl- isomerase	0.00214362
comp183106_c0_seq1	GBRG01058408.1	methionine synthase	0.00189036
comp183126_c0_seq1	GBRG01058452.1	peroxiredoxin- mitochondrial	0.0850112
comp183126_c0_seq2	GBRG01251703.1	peroxiredoxin- mitochondrial-like	0.0868571
comp183144_c0_seq1	GBRG01058491.1	nucleoside diphosphate kinase homolog 5-like	0.000958773
comp183151_c0_seq1	GBRG01058509.1	peptidyl-prolyl cis-trans isomerase-like 1	0.00782473
comp183165_c0_seq1	GBRG01058551.1	glutathione peroxidase	0.00417973
comp183203_c0_seq1	GBRG01058666.1	canopy 2 homolog	0.000804505
comp183210_c0_seq1	GBRG01058693.1	mercaptopyruvate sulfurtransferase	0.00274977
comp183216_c0_seq1	GBRG01058705.1	gtpase kras-like	0.0153846
comp183216_c1_seq1	GBRG01058706.1	v-ki-ras2 kirsten rat sarcoma viral oncogene homolog	0.00750469
comp183218_c0_seq1	GBRG01058710.1	PREDICTED: uncharacterized protein LOC100210570	0.00714286
comp183223_c0_seq1	GBRG01058725.1	zinc finger protein 323	0.000380952
comp183234_c0_seq1	GBRG01058765.1	tumor suppressor candidate 3	0.00555556
comp183239_c0_seq1	GBRG01251702.1	PREDICTED: similar to predicted protein [Hydra magnipapillata]	0.0167598
comp183247_c0_seq1	GBRG01058810.1	enhancer of rudimentary homolog	0.00648298
comp183266_c0_seq1	GBRG01000076.1	atp synthase delta mitochondrial	0.0442804
comp183302_c1_seq1	GBRG01058997.1	cysteine rich bmp regulator 2	0.0022748
comp183302_c1_seq2	GBRG01058998.1	cysteine rich bmp regulator 2	0.00291375
comp183319_c0_seq1	GBRG01000077.1	cytochrome c oxidase subunit mitochondrial precursor	0.0352761
comp183337_c0_seq1	GBRG01251701.1	achain crystal structure of ketosteroid isomerase ( ) from mesorhizobium loti at a resolution	0.00728863
comp183337_c0_seq2	GBRG01251700.1	achain crystal structure of ketosteroid isomerase ( ) from mesorhizobium loti at a resolution	0.00762195
comp183364_c0_seq1	GBRG01251824.1	eukaryotic translation initiation factor 3 subunit g	0.00330579
comp183364_c0_seq2	GBRG01059174.1	eukaryotic translation initiation factor 3 subunit g	0.00436681
comp183364_c0_seq3	GBRG01059175.1	translation initiation factor subunit	0.00784314
comp183364_c0_seq4	GBRG01000078.1	eukaryotic translation initiation factor 3 subunit g	0.00784314
comp183364_c1_seq1	GBRG01251699.1	eukaryotic translation initiation factor 3 subunit g	0.00361337
comp183391_c0_seq1	GBRG01059280.1	trafficking protein particle complex subunit 3	0.00373413
comp183391_c0_seq2	GBRG01059281.1	trafficking protein particle complex subunit 3	0.00377644
comp183405_c0_seq1	GBRG01059314.1	muconolactone delta-isomerase	0.00327065
comp183444_c0_seq1	GBRG01059480.1	tyrosinase-like protein tyr-3-like	0.00149402
comp183468_c0_seq1	GBRG01000081.1	prostaglandin d2 hematopoietic-like	0.0689942
comp183471_c0_seq1	GBRG01059554.1	ef hand domain protein	0.00289436
comp183471_c0_seq2	GBRG01059555.1	ef hand domain protein	0.00292398
comp183471_c0_seq3	GBRG01059556.1	NA	0.0029985
comp183471_c0_seq4	GBRG01059557.1	NA	0.0030303
comp183471_c0_seq5	GBRG01059558.1	NA	0.00336134
comp183471_c0_seq6	GBRG01059559.1	NA	0.00340136
comp183471_c0_seq7	GBRG01059560.1	NA	0.00347222
comp183471_c0_seq8	GBRG01059561.1	ef hand domain protein	0.00393701
comp183482_c0_seq11	GBRG01059602.1	NA	0.532407
comp183482_c0_seq6	GBRG01059597.1	matrix metalloproteinase 9	0.036961
comp183482_c0_seq7	GBRG01059598.1	iii-fbpl precursor	0.0484988
comp183482_c0_seq9	GBRG01059600.1	NA	0.0721649
comp183532_c0_seq1	GBRG01251691.1	keratinocyte-associated protein 2-like	0.00353774
comp183539_c0_seq1	GBRG01059761.1	carnitine palmitoyltransferase 2	0.00190961
comp183550_c0_seq1	GBRG01059791.1	NA	0.000943396
comp183581_c0_seq1	GBRG01059879.1	PREDICTED: hypothetical protein [Hydra magnipapillata]	0.00362319
comp183587_c0_seq1	GBRG01000082.1	yth domain family protein 2	0.00871348
comp183592_c0_seq1	GBRG01059913.1	ubiquitin-fold modifier 1	0.0125786
comp183597_c0_seq1	GBRG01251690.1	diazepam binding inhibitor	0.00559441
comp183597_c0_seq2	GBRG01251689.1	acyl- -binding protein	0.00759013
comp183611_c0_seq1	GBRG01251688.1	protein	0.0248262
comp183611_c0_seq2	GBRG01251687.1	protein	0.0263019
comp183627_c0_seq1	GBRG01060022.1	cystatin-b	0.00137741
comp183627_c0_seq2	GBRG01060023.1	cystatin-b	0.00141844
comp183652_c0_seq1	GBRG01251686.1	guanine nucleotide binding protein (g protein) beta polypeptide 2-like 1	0.121057
comp183652_c1_seq1	GBRG01251685.1	guanine nucleotide binding protein (g protein) beta polypeptide 2-like 1	0.121057
comp183655_c0_seq1	GBRG01060099.1	nadh dehydrogenase	0.00117994
comp183670_c0_seq1	GBRG01000083.1	calcyphosin-like protein	0.0487239
comp183708_c0_seq1	GBRG01060257.1	aure_aurau ame: full=aurelin flags: precursor	0.000923361
comp183719_c0_seq1	GBRG01060305.1	NA	0.0118519
comp183727_c0_seq1	GBRG01251684.1	basic leucine zipper and w2 domain-containing protein 2	0.00931507
comp183770_c0_seq1	GBRG01060444.1	membrane frizzled-related protein	0.00633312
comp183770_c0_seq2	GBRG01060445.1	NA	0.0064433
comp183783_c0_seq1	GBRG01251683.1	NA	0.00683527
comp183783_c0_seq2	GBRG01251682.1	NA	0.00698324
comp183783_c0_seq5	GBRG01251679.1	NA	0.00800641
comp183788_c0_seq1	GBRG01060486.1	nucleoredoxin-like protein 2	0.00391007
comp183788_c0_seq2	GBRG01060487.1	16 kda	0.0039604
comp183807_c0_seq1	GBRG01060541.1	udp-sugar diphosphatase	0.00102564
comp183829_c0_seq1	GBRG01251334.1	counting factor associated protein d-like	0.00791883
comp183829_c0_seq2	GBRG01251335.1	counting factor associated protein d-like	0.00795426
comp183829_c0_seq3	GBRG01251336.1	counting factor associated protein d-like	0.0079602
comp183841_c0_seq1	GBRG01060649.1	beta 2c	1.01935
comp183841_c0_seq2	GBRG01060650.1	beta 2c	1.02115
comp183842_c0_seq1	GBRG01060651.1	l-3-hydroxyacyl-coenzyme a short chain	0.0435821
comp183854_c0_seq1	GBRG01060687.1	mgc171407 protein	0.0095511
comp183867_c0_seq1	GBRG01060711.1	ras-related protein rab-6a-like	0.007109
comp183872_c0_seq2	GBRG01060724.1	NA	0.00809717
comp183882_c0_seq1	GBRG01060759.1	zinc metalloproteinase nas-13-like	0.0017316
comp183889_c0_seq1	GBRG01060775.1	vesicle transport through interaction with t-snares homolog 1b	0.00176211
comp183889_c0_seq2	GBRG01060776.1	vesicle transport through interaction with t-snares homolog 1b	0.00213904
comp183893_c0_seq1	GBRG01060789.1	myosin light polypeptide 6	0.00682594
comp183934_c2_seq1	GBRG01060948.1	phospholipid scramblase 1	0.00852878
comp183953_c0_seq1	GBRG01061032.1	cholinephosphotransferase 1	0.00134048
comp183960_c0_seq1	GBRG01061047.1	upf0468 protein c16orf80 homolog	0.00571973
comp183976_c0_seq1	GBRG01061110.1	methylcrotonoyl- carboxylase beta mitochondrial	0.00986436
comp184014_c0_seq1	GBRG01061233.1	merlin moesin ezrin radixin	0.000590145
comp184022_c0_seq1	GBRG01061258.1	pituitary homeobox 3	0.00116777
comp184026_c0_seq1	GBRG01061274.1	ef-hand domain-containing protein d2	0.00378788
comp184026_c0_seq2	GBRG01061275.1	ef-hand domain-containing protein d2	0.00387097
comp184049_c0_seq1	GBRG01061347.1	NA	0.00257511
comp184049_c0_seq2	GBRG01061348.1	NA	0.00298507
comp184049_c0_seq4	GBRG01061350.1	NA	0.00331858
comp184049_c0_seq5	GBRG01061351.1	NA	0.00403226
comp184053_c0_seq1	GBRG01251674.1	cytochrome b-c1 complex subunit mitochondrial-like	0.0483772
comp184063_c0_seq1	GBRG01061401.1	NA	0.000260281
comp184069_c0_seq1	GBRG01061414.1	histamine n-methyltransferase	0.000764526
comp184069_c0_seq3	GBRG01061416.1	NA	0.00245098
comp184071_c0_seq1	GBRG01251673.1	eukaryotic initiation factor 4a-iii	0.00455927
comp184089_c0_seq1	GBRG01061478.1	NA	0.00724638
comp184111_c0_seq1	GBRG01061560.1	mitochondrial nadh-ubiquinone oxidoreductase 75 kda subunit	0.0384291
comp184135_c0_seq1	GBRG01061661.1	short-chain dehydrogenase reductase sdr	0.0259965
comp184138_c0_seq1	GBRG01061679.1	NA	0.00782881
comp184162_c0_seq1	GBRG01061738.1	v-type proton atpase subunit g-like	0.0248276
comp184179_c0_seq1	GBRG01061815.1	was protein family homolog 1	0.00554529
comp184195_c0_seq1	GBRG01061882.1	NA	0.000699301
comp184198_c0_seq1	GBRG01061886.1	fungal metazoan origin like protein variant 2	0.00160256
comp184198_c0_seq2	GBRG01061887.1	fungal metazoan origin like protein variant 2	0.0017452
comp184237_c0_seq1	GBRG01062015.1	dpy30 domain-containing protein 1-like	0.00530973
comp184245_c0_seq1	GBRG01062057.1	NA	0.00369004
comp184271_c0_seq1	GBRG01062131.1	fibulin-1 precursor	0.0128068
comp184291_c0_seq1	GBRG01062173.1	NA	0.000896057
comp184291_c0_seq2	GBRG01062174.1	NA	0.000906618
comp184302_c0_seq1	GBRG01251388.1	splicing arginine serine-rich 4	0.0134185
comp184334_c0_seq1	GBRG01000088.1	riken cdna 1700019l03 gene	0.000613309
comp184338_c0_seq1	GBRG01062330.1	mitochondrial superoxide dismutase 2 variant 1	0.0319516
comp184347_c0_seq1	GBRG01062368.1	catenin alpha-2 isoform 1	0.0211778
comp184380_c0_seq1	GBRG01062478.1	u6 snrna-associated sm-like protein lsm1-like	0.00379267
comp184391_c0_seq1	GBRG01062538.1	NA	0.00129032
comp184391_c0_seq2	GBRG01062539.1	NA	0.00129534
comp184453_c0_seq1	GBRG01062733.1	probable methylthioribulose-1-phosphate dehydratase-like	0.0029383
comp184453_c0_seq2	GBRG01062734.1	probable methylthioribulose-1-phosphate dehydratase-like	0.00731707
comp184464_c0_seq1	GBRG01062775.1	NA	0.000333
comp184464_c0_seq2	GBRG01062776.1	NA	0.000333
comp184464_c0_seq3	GBRG01062777.1	NA	0.000334448
comp184464_c0_seq4	GBRG01062778.1	NA	0.000334448
comp184464_c0_seq5	GBRG01062779.1	NA	0.000334448
comp184464_c0_seq6	GBRG01062780.1	hypothetical loc496800	0.000334448
comp184464_c0_seq7	GBRG01062781.1	NA	0.000335909
comp184464_c0_seq8	GBRG01062782.1	NA	0.000335909
comp184485_c0_seq1	GBRG01062858.1	phosphoenolpyruvate phosphomutase	0.0672748
comp184494_c0_seq1	GBRG01062931.1	katanin p80 wd40-containing subunit b1	0.000637552
comp184508_c0_seq1	GBRG01062969.1	aminoacyl trna synthase complex-interacting multifunctional protein 1-like	0.0144928
comp184511_c0_seq1	GBRG01062973.1	tetratricopeptide repeat protein 25	0.00132861
comp184513_c0_seq1	GBRG01062975.1	NA	0.00472144
comp184513_c0_seq2	GBRG01062976.1	NA	0.00591716
comp184527_c0_seq1	GBRG01063042.1	NA	0.000690608
comp184533_c0_seq1	GBRG01063055.1	electron transfer flavoprotein subunit mitochondrial precursor	0.0816327
comp184534_c1_seq1	GBRG01063056.1	regucalcin	0.0853971
comp184572_c0_seq1	GBRG01063170.1	ran-specific gtpase-activating protein	0.00735971
comp184578_c0_seq2	GBRG01063201.1	bryohealin precursor	0.109127
comp184578_c0_seq3	GBRG01063202.1	bryohealin precursor	0.12993
comp184578_c0_seq4	GBRG01063203.1	bryohealin precursor	0.135773
comp184578_c0_seq5	GBRG01063204.1	f-type lectin 2	0.200361
comp184578_c0_seq6	GBRG01063205.1	NA	0.210332
comp184578_c0_seq7	GBRG01063206.1	f-type lectin 2	0.235169
comp184578_c0_seq8	GBRG01063207.1	NA	0.247826
comp184578_c0_seq9	GBRG01063208.1	Coagulation factor 5/8 C	0.251101
comp184582_c0_seq1	GBRG01063225.1	grb2-associated-binding protein 1-like	0.000463177
comp184588_c1_seq1	GBRG01000090.1	nop58 protein	0.0113136
comp184589_c0_seq1	GBRG01063240.1	macpf domain containing protein	0.00413508
comp184591_c0_seq1	GBRG01251788.1	ribosomal protein l26	0.0318792
comp184600_c1_seq1	GBRG01063288.1	NA	0.0013089
comp184600_c1_seq2	GBRG01063289.1	NA	0.00131406
comp184603_c0_seq1	GBRG01063295.1	glutathione transferase zeta 1	0.00741525
comp184609_c0_seq1	GBRG01251670.1	40s ribosomal protein s11-like	0.113402
comp184617_c0_seq1	GBRG01063370.1	collagen alpha-6 chain	0.0151515
comp184640_c0_seq1	GBRG01063429.1	tubulin polymerization-promoting protein family member 2	0.00658979
comp184682_c0_seq1	GBRG01063615.1	vacuolar-sorting protein snf8-like	0.000692042
comp184683_c0_seq1	GBRG01251669.1	ribosomal protein l13	0.127072
comp184690_c1_seq1	GBRG01063669.1	NA	0.00391389
comp184690_c1_seq2	GBRG01063670.1	NA	0.00407886
comp184690_c1_seq3	GBRG01063671.1	serine threonine protein phosphatase 4 regulatory	0.00409277
comp184690_c1_seq4	GBRG01063672.1	serine threonine protein phosphatase 4 regulatory	0.0042735
comp184713_c0_seq1	GBRG01000091.1	translocon-associated protein subunit alpha-like	0.00385604
comp184713_c0_seq2	GBRG01000092.1	translocon-associated protein subunit alpha	0.00423131
comp184713_c0_seq3	GBRG01000093.1	translocon-associated protein subunit alpha	0.00437956
comp184713_c0_seq4	GBRG01063793.1	signal sequence receptor alpha	0.0881459
comp184713_c0_seq5	GBRG01063794.1	NA	0.24537
comp184713_c0_seq6	GBRG01063795.1	translocon-associated protein subunit alpha	0.24537
comp184713_c1_seq1	GBRG01000094.1	translocon-associated protein subunit alpha-like	0.00385604
comp184713_c1_seq2	GBRG01063796.1	translocon-associated protein alpha	0.0849195
comp184713_c1_seq3	GBRG01000095.1	NA	0.00516351
comp184720_c0_seq1	GBRG01063823.1	purine nucleoside phosphorylase-like	0.0181087
comp184720_c0_seq2	GBRG01063824.1	purine nucleoside phosphorylase-like	0.0182309
comp184769_c0_seq1	GBRG01064021.1	translin	0.000757002
comp184770_c0_seq1	GBRG01064022.1	NA	0.0025974
comp184782_c0_seq1	GBRG01064066.1	ef-hand domain-containing protein d2	0.00490798
comp184786_c1_seq1	GBRG01064078.1	glutamate dehydrogenase	0.0176511
comp184786_c1_seq2	GBRG01064079.1	glutamate dehydrogenase	0.0179496
comp184788_c0_seq1	GBRG01251665.1	ribosomal protein l5	0.0613718
comp184806_c0_seq1	GBRG01251664.1	nadh dehydrogenase	0.0277228
comp184814_c0_seq1	GBRG01064169.1	cytochrome c oxidase polypeptide mitochondrial precursor	0.00705882
comp184816_c0_seq1	GBRG01064184.1	ubx domain-containing protein 4	0.000555556
comp184835_c0_seq1	GBRG01064264.1	nadph-dependent fmn reductase	0.00688073
comp184868_c0_seq1	GBRG01064399.1	u2 small nuclear rna auxiliary factor 1	0.00928074
comp184875_c0_seq1	GBRG01064444.1	protein dd3-3-like isoform 1	0.0195059
comp184886_c0_seq1	GBRG01064482.1	NA	0.00171821
comp184886_c0_seq2	GBRG01064483.1	NA	0.0017331
comp184889_c0_seq1	GBRG01064515.1	NA	0.00093985
comp184889_c0_seq2	GBRG01064516.1	NA	0.000959233
comp184889_c0_seq3	GBRG01064517.1	NA	0.00112549
comp184889_c0_seq4	GBRG01064518.1	NA	0.0011534
comp184889_c0_seq6	GBRG01064520.1	NA	0.00163532
comp184889_c0_seq8	GBRG01064522.1	NA	0.00169492
comp184907_c0_seq1	GBRG01251353.1	kielin chordin-like protein	0.0182927
comp184907_c1_seq1	GBRG01251662.1	kielin chordin-like protein	0.0170132
comp184962_c0_seq1	GBRG01251659.1	calmodulin 2-like	0.00304569
comp184964_c0_seq1	GBRG01064798.1	sorting nexin-6-like	0.00450704
comp184981_c1_seq1	GBRG01064886.1	peptidoglycan binding protein	0.000312891
comp185014_c0_seq1	GBRG01065004.1	NA	0.0144928
comp185014_c0_seq2	GBRG01065005.1	retinol dehydratase	0.0152727
comp185015_c0_seq1	GBRG01065008.1	inosine triphosphate pyrophosphatase	0.00262467
comp185036_c0_seq1	GBRG01251239.1	26s proteasome non-atpase regulatory subunit 7	0.00675676
comp185040_c0_seq1	GBRG01065148.1	plasma cell-induced resident endoplasmic reticulum	0.0203106
comp185054_c0_seq1	GBRG01251657.1	dehydrodolichyl diphosphate synthase	0.0010627
comp185064_c1_seq1	GBRG01065221.1	myeloid differentiation primary response gene 88	0.00359712
comp185072_c0_seq1	GBRG01065247.1	NA	0.0324826
comp185072_c0_seq2	GBRG01065248.1	epididymal secretory protein e1 precursor	0.0341048
comp185073_c0_seq1	GBRG01065252.1	carnitine-acylcarnitine carrier	0.000809061
comp185073_c0_seq2	GBRG01065253.1	NA	0.000887311
comp185078_c0_seq1	GBRG01065263.1	NA	0.000742942
comp185078_c0_seq2	GBRG01065264.1	loc100145131 protein	0.00116822
comp185078_c0_seq3	GBRG01065265.1	NA	0.00176056
comp185090_c0_seq1	GBRG01065331.1	protein cwc15 homolog	0.00107066
comp185090_c1_seq1	GBRG01065332.1	protein cwc15 homolog a-like	0.00125156
comp185090_c1_seq2	GBRG01065333.1	protein cwc15 homolog	0.00127389
comp185101_c0_seq3	GBRG01065384.1	3-ketoacyl- mitochondrial	0.0153061
comp185101_c0_seq4	GBRG01065385.1	3-ketoacyl- mitochondrial	0.0383142
comp185101_c1_seq1	GBRG01065387.1	3-ketoacyl- mitochondrial	0.0223964
comp185101_c1_seq2	GBRG01065388.1	3-ketoacyl- mitochondrial	0.0145773
comp185101_c1_seq6	GBRG01065392.1	NA	0.00465116
comp185113_c0_seq1	GBRG01065433.1	syntaxin 6	0.000475964
comp185132_c0_seq3	GBRG01065518.1	PREDICTED: similar to predicted protein [Hydra magnipapillata]	0.00206186
comp185135_c0_seq1	GBRG01251656.1	protein	0.0558476
comp185136_c1_seq1	GBRG01251655.1	chromosome 2 open reading frame 62	0.00234055
comp185168_c0_seq1	GBRG01065675.1	NA	0.000814996
comp185168_c0_seq2	GBRG01065676.1	NA	0.00124224
comp185212_c0_seq1	GBRG01251654.1	coactosin-like protein	0.0473373
comp185212_c0_seq2	GBRG01251653.1	coactosin-like protein	0.0475836
comp185230_c0_seq1	GBRG01251652.1	60s ribosomal protein l8-like	0.0871508
comp185232_c0_seq1	GBRG01065945.1	adp-ribosylation factor-like 2	0.00146628
comp185232_c0_seq2	GBRG01065946.1	adp-ribosylation factor-like 2	0.00153846
comp185237_c0_seq1	GBRG01251651.1	eukaryotic initiation factor 4a-ii	0.109867
comp185241_c0_seq1	GBRG01065982.1	tubulin-specific chaperone a	0.0180383
comp185241_c0_seq2	GBRG01065983.1	tubulin-specific chaperone a	0.0184544
comp185245_c0_seq1	GBRG01066004.1	glycogenin 1	0.00511696
comp185260_c0_seq1	GBRG01066053.1	ras-related protein rab-6a	0.0074184
comp185263_c0_seq1	GBRG01066066.1	NA	0.00319489
comp185263_c0_seq3	GBRG01066068.1	NA	0.00442478
comp185282_c0_seq1	GBRG01066134.1	myosin-11- partial	0.00273973
comp185287_c0_seq1	GBRG01066153.1	tpa: neurexin 2-like	0.00224719
comp185287_c0_seq2	GBRG01066154.1	follistatin-related protein 4 precursor	0.00287356
comp185287_c0_seq3	GBRG01066155.1	NA	0.00291545
comp185287_c0_seq4	GBRG01066156.1	protein agr-1	0.00300752
comp185297_c1_seq1	GBRG01066186.1	cre-sox-3 protein	0.000853789
comp185297_c1_seq2	GBRG01066187.1	cre-sox-3 protein	0.000864118
comp185298_c0_seq1	GBRG01066192.1	NA	0.000297
comp185302_c0_seq1	GBRG01066202.1	protein	0.0236686
comp185302_c0_seq2	GBRG01066203.1	protein	0.0272109
comp185310_c0_seq1	GBRG01066220.1	spermidine synthase	0.0030722
comp185310_c0_seq2	GBRG01066221.1	NA	0.00166113
comp185311_c0_seq1	GBRG01066222.1	ras gtpase	0.0671892
comp185325_c0_seq1	GBRG01066267.1	peptidyl-prolyl cis-trans isomerase fkbp14-like	0.0141844
comp185326_c0_seq1	GBRG01066268.1	di-n-acetylchitobiase precursor	0.0015625
comp185335_c0_seq1	GBRG01066300.1	hypothetical protein NATL1_01011 [Prochlorococcus marinus str. NATL1A]	0.00332963
comp185351_c0_seq1	GBRG01066358.1	n-terminal ef-hand calcium-binding protein 1	0.004329
comp185365_c0_seq1	GBRG01066411.1	synaptotagmin xiv	0.000666223
comp185406_c0_seq1	GBRG01000103.1	hypothetical protein CAPTEDRAFT_201069	0.00115407
comp185410_c0_seq1	GBRG01066570.1	protein	0.0465567
comp185411_c0_seq1	GBRG01066571.1	histone deacetylase complex subunit sap18-like	0.00170648
comp185415_c1_seq1	GBRG01251647.1	60s ribosomal protein l18-like	0.433333
comp185417_c0_seq1	GBRG01251646.1	coiled-coil domain containing 47	0.00357873
comp185438_c0_seq1	GBRG01000104.1	phospholipase a2	0.0149925
comp185452_c0_seq1	GBRG01066771.1	ldlr chaperone mesd precursor	0.000468384
comp185457_c0_seq1	GBRG01251645.1	ribosomal protein s12	0.190813
comp185475_c0_seq1	GBRG01066883.1	thioredoxin-related transmembrane protein 1-like	0.00241896
comp185479_c0_seq1	GBRG01066900.1	NA	0.00406298
comp185479_c0_seq2	GBRG01066901.1	protein	0.0045403
comp185479_c0_seq3	GBRG01066902.1	lysine decarboxylase	0.0052597
comp185479_c0_seq4	GBRG01066903.1	protein	0.00608828
comp185482_c0_seq1	GBRG01066910.1	hemicentin- partial	0.00221076
comp185482_c0_seq2	GBRG01066911.1	cell adhesion molecule	0.00252951
comp185568_c0_seq1	GBRG01067263.1	NA	0.0515774
comp185568_c0_seq2	GBRG01067264.1	fatty aldehyde dehydrogenase isoform 2	0.0515774
comp185568_c0_seq3	GBRG01067265.1	fatty aldehyde dehydrogenase isoform 2	0.0517588
comp185568_c4_seq1	GBRG01067283.1	fatty aldehyde dehydrogenase isoform 2	0.0429704
comp185568_c4_seq2	GBRG01067284.1	NA	0.0515774
comp185569_c0_seq1	GBRG01067292.1	centrin-3	0.00199402
comp185571_c0_seq1	GBRG01067299.1	dihydropteridine reductase	0.00756144
comp185595_c0_seq1	GBRG01067403.1	NA	0.00114811
comp185595_c0_seq2	GBRG01067404.1	cytochrome c oxidase assembly factor 5-like	0.00149477
comp185616_c0_seq1	GBRG01067473.1	glutathione transferase	0.00400687
comp185616_c0_seq2	GBRG01067474.1	glutathione s-transferase	0.00429448
comp185624_c0_seq1	GBRG01251642.1	peroxiredoxin 4	0.129518
comp185635_c0_seq3	GBRG01067564.1	NA	0.00340136
comp185642_c0_seq1	GBRG01067615.1	arylesterase	0.015246
comp185662_c1_seq1	GBRG01251856.1	60s acidic ribosomal protein p0	0.0304147
comp185670_c0_seq1	GBRG01251794.1	cchc-type zinc finger protein cg3800-like	0.0567686
comp185673_c0_seq1	GBRG01067708.1	NA	0.00228571
comp185673_c0_seq2	GBRG01067709.1	NA	0.00248756
comp185695_c0_seq1	GBRG01251641.1	eukaryotic translation initiation factor 3 subunit m	0.0274809
comp185705_c0_seq1	GBRG01067820.1	zinc finger protein 622	0.00475059
comp185705_c0_seq2	GBRG01067821.1	NA	0.00550964
comp185705_c2_seq1	GBRG01067826.1	zinc finger protein 622	0.00486618
comp185706_c0_seq1	GBRG01067831.1	NA	0.00519481
comp185725_c0_seq1	GBRG01251859.1	eukaryotic translation elongation factor 1 gamma	0.060472
comp185739_c0_seq1	GBRG01067966.1	NA	0.00139082
comp185748_c0_seq1	GBRG01000106.1	nadh dehydrogenase	0.0008726
comp185766_c0_seq1	GBRG01251639.1	atp synthase subunit mitochondrial precursor	0.0756376
comp185774_c0_seq1	GBRG01251638.1	hypotherical protein	0.0493033
comp185774_c0_seq2	GBRG01251637.1	hypotherical protein	0.0538012
comp185781_c0_seq1	GBRG01068120.1	chromosome 12 open reading frame 69	0.0023015
comp185782_c0_seq1	GBRG01068121.1	poly -specific endoribonuclease-b-like	0.00156495
comp185782_c0_seq2	GBRG01068122.1	endou protein	0.00215983
comp185792_c0_seq1	GBRG01068170.1	phospholipase gamma 1	0.00277008
comp185806_c0_seq1	GBRG01251635.1	peroxiredoxin 1	0.140659
comp185810_c0_seq1	GBRG01068227.1	cytochrome b-c1 complex subunit 7	0.00199601
comp185821_c0_seq1	GBRG01068253.1	PREDICTED: hypothetical protein [Hydra magnipapillata]	0.00151057
comp185822_c0_seq1	GBRG01251634.1	40s ribosomal protein s2	0.0671902
comp185828_c0_seq2	GBRG01068307.1	selenoprotein w2a	0.00668151
comp185828_c3_seq4	GBRG01068320.1	selenoprotein w2a	0.0137615
comp185829_c0_seq1	GBRG01068333.1	ubiquitin-conjugating enzyme e2 g1	0.00511509
comp185838_c0_seq1	GBRG01251633.1	citrate synthase	0.0794521
comp185858_c2_seq1	GBRG01068487.1	NA	0.0189873
comp185858_c2_seq2	GBRG01068488.1	fus interacting protein (serine arginine-rich) 1	0.0192308
comp185858_c2_seq3	GBRG01068489.1	fus interacting protein (serine arginine-rich) 1	0.0245041
comp185862_c0_seq1	GBRG01068512.1	wiskott-aldrich syndrome protein family member 3	0.00457143
comp185863_c0_seq1	GBRG01251632.1	receptor expression-enhancing protein 5	0.023701
comp185868_c0_seq1	GBRG01068519.1	serine arginine-rich splicing factor 1-like	0.0616246
comp185877_c0_seq1	GBRG01068572.1	predicted protein	0.000775194
comp185881_c0_seq1	GBRG01068592.1	NA	0.00812434
comp185884_c0_seq1	GBRG01068596.1	nuclear transcription factor y subunit alpha-like	0.000750751
comp185884_c0_seq2	GBRG01068597.1	nuclear transcription factor y subunit alpha-like	0.000772201
comp185894_c0_seq1	GBRG01068662.1	dna-directed rna polymerases and iii subunit rpabc3	0.00149031
comp185894_c0_seq2	GBRG01068663.1	dna-directed rna polymerases and iii subunit rpabc3	0.00173913
comp185894_c1_seq1	GBRG01068665.1	dna-directed rna polymerases and iii subunit rpabc3	0.00173913
comp185894_c1_seq2	GBRG01068666.1	dna-directed rna polymerases and iii subunit rpabc3	0.00184502
comp185899_c0_seq1	GBRG01068704.1	NA	0.00638978
comp185899_c0_seq2	GBRG01068705.1	arylesterase	0.00676437
comp185900_c0_seq1	GBRG01251607.1	26s proteasome non-atpase regulatory subunit 13	0.0332817
comp185901_c0_seq1	GBRG01068709.1	NA	0.00115473
comp185901_c0_seq2	GBRG01068710.1	NA	0.00117096
comp185901_c0_seq3	GBRG01068711.1	NA	0.00146628
comp185901_c0_seq4	GBRG01068712.1	NA	0.00149254
comp185921_c0_seq1	GBRG01251606.1	60s ribosomal protein l13a	0.140482
comp185921_c1_seq1	GBRG01251605.1	60s ribosomal protein l13a-like	0.140482
comp185940_c0_seq1	GBRG01068954.1	microsomal glutathione s-transferase 2	0.0126126
comp185940_c0_seq2	GBRG01068955.1	microsomal glutathione s-transferase 2	0.0179718
comp185954_c0_seq1	GBRG01000118.1	luc7-like 2 ( cerevisiae)	0.002079
comp185954_c0_seq2	GBRG01000119.1	luc7-like 2 ( cerevisiae)	0.00212089
comp185974_c0_seq1	GBRG01251603.1	malate dehydrogenase mitochondrial variant 1	0.196536
comp185986_c0_seq1	GBRG01069102.1	NA	0.00660066
comp185999_c0_seq1	GBRG01069158.1	g protein-coupled receptor kinase 5	0.000325309
comp186009_c0_seq1	GBRG01069184.1	calbindin-32	0.00195567
comp186032_c0_seq1	GBRG01000120.1	protein	0.079456
comp186040_c0_seq1	GBRG01069329.1	proteasome subunit beta type-7	0.0347913
comp186055_c0_seq1	GBRG01069381.1	alcohol dehydrogenase	0.010352
comp186056_c0_seq1	GBRG01251600.1	predicted protein [Nematostella vectensis]	0.0241433
comp186057_c0_seq1	GBRG01251599.1	PREDICTED: hypothetical protein [Hydra magnipapillata]	0.00226244
comp186067_c0_seq1	GBRG01069448.1	protein	0.00108108
comp186069_c0_seq1	GBRG01069452.1	vesicle-associated membrane protein 712	0.00229095
comp186084_c3_seq6	GBRG01069532.1	NA	0.004914
comp186084_c3_seq8	GBRG01069534.1	NA	0.00696864
comp186126_c0_seq1	GBRG01069730.1	jc7958galaxin precursor - reef coral	0.00264375
comp186126_c0_seq2	GBRG01069731.1	NA	0.00307692
comp186136_c0_seq3	GBRG01069761.1	member ras oncogene family	0.00757576
comp186136_c0_seq5	GBRG01069763.1	ras-related protein rab-11a isoform 2	0.0116505
comp186136_c0_seq7	GBRG01069765.1	NA	0.017192
comp186137_c0_seq1	GBRG01069767.1	ubtf protein	0.0031407
comp186145_c1_seq1	GBRG01069785.1	PREDICTED: uncharacterized protein LOC101238855	0.0118939
comp186151_c0_seq1	GBRG01069810.1	eukaryotic translation initiation factor 5	0.00720906
comp186168_c0_seq1	GBRG01069898.1	NA	0.00176056
comp186168_c0_seq2	GBRG01069899.1	NA	0.00176056
comp186168_c0_seq3	GBRG01069900.1	NA	0.00178891
comp186168_c0_seq4	GBRG01069901.1	NA	0.00180505
comp186168_c0_seq5	GBRG01069902.1	NA	0.00183486
comp186186_c0_seq1	GBRG01070022.1	eukaryotic translation initiation factor 4e-binding protein 2	0.00410256
comp186223_c0_seq1	GBRG01070152.1	rna-binding protein 15b-like	0.000718907
comp186246_c0_seq1	GBRG01070320.1	enhancer of yellow 2 transcription factor homolog	0.00155521
comp186248_c0_seq1	GBRG01070332.1	NA	0.000934579
comp186248_c0_seq2	GBRG01070333.1	NA	0.00101781
comp186269_c0_seq1	GBRG01070424.1	methylmalonyl epimerase	0.00143678
comp186273_c1_seq1	GBRG01070434.1	histone -like	0.126374
comp186273_c3_seq1	GBRG01070447.1	histone -like	0.121265
comp186278_c1_seq1	GBRG01070468.1	NA	0.00120773
comp186278_c1_seq2	GBRG01070469.1	NA	0.00173611
comp186278_c1_seq3	GBRG01070470.1	NA	0.00177305
comp186278_c1_seq4	GBRG01070471.1	NA	0.00201816
comp186315_c0_seq1	GBRG01070652.1	merozoite surface protein partial	0.00736498
comp186337_c0_seq1	GBRG01070769.1	ubiquitin-conjugating enzyme e2h	0.00120919
comp186358_c0_seq1	GBRG01070862.1	non-specific lipid-transfer protein	0.0319917
comp186358_c0_seq2	GBRG01070863.1	non-specific lipid-transfer protein	0.0293333
comp186363_c0_seq1	GBRG01070882.1	NA	0.00137931
comp186366_c0_seq11	GBRG01070907.1	zinc - partial	0.0103017
comp186366_c0_seq14	GBRG01070910.1	NA	0.00545596
comp186366_c0_seq15	GBRG01070911.1	NA	0.00550747
comp186366_c0_seq16	GBRG01070912.1	NA	0.00555997
comp186366_c0_seq17	GBRG01070913.1	NA	0.00561347
comp186366_c0_seq18	GBRG01070914.1	NA	0.00566802
comp186366_c0_seq19	GBRG01070915.1	NA	0.00594228
comp186366_c0_seq20	GBRG01070916.1	astacin 3	0.00615655
comp186366_c0_seq3	GBRG01070899.1	NA	0.00462046
comp186366_c0_seq4	GBRG01070900.1	NA	0.00465426
comp186366_c0_seq5	GBRG01070901.1	NA	0.00469169
comp186386_c0_seq1	GBRG01070985.1	cytochrome c oxidase copper chaperone	0.011657
comp186386_c0_seq2	GBRG01070986.1	cytochrome c oxidase copper chaperone	0.0128558
comp186393_c0_seq1	GBRG01071033.1	protein canopy 4-like	0.00876601
comp186433_c1_seq1	GBRG01071194.1	NA	0.00448833
comp186433_c1_seq2	GBRG01071195.1	uridine-cytidine kinase 2	0.00568828
comp186435_c0_seq1	GBRG01251596.1	gmp reductase 2	0.0224626
comp186435_c0_seq2	GBRG01251595.1	gmp reductase 2	0.0234579
comp186435_c0_seq3	GBRG01251594.1	gmp reductase 2	0.00167504
comp186435_c2_seq1	GBRG01251593.1	gmp reductase 2	0.0232158
comp186435_c2_seq2	GBRG01251592.1	gmp reductase 2	0.0232558
comp186468_c0_seq1	GBRG01071353.1	vacuolar protein sorting-associated protein 26b	0.00260417
comp186484_c0_seq1	GBRG01071395.1	cysteine mitochondrial-like	0.00734394
comp186484_c0_seq2	GBRG01071396.1	cysteine mitochondrial	0.00744879
comp186487_c0_seq3	GBRG01251468.1	histone h4	0.480645
comp186487_c1_seq2	GBRG01000124.1	protein	0.423898
comp186487_c1_seq3	GBRG01251509.1	histone h4	0.529307
comp186501_c0_seq1	GBRG01251590.1	thymosin beta homologue	0.134933
comp186501_c0_seq2	GBRG01251589.1	thymosin beta homologue	0.182933
comp186501_c0_seq3	GBRG01071472.1	thymosin beta homologue	0.143551
comp186503_c0_seq1	GBRG01071475.1	comm domain-containing protein 3	0.00183655
comp186531_c0_seq1	GBRG01071654.1	adp-ribosylation factor 1	0.00224215
comp186533_c0_seq1	GBRG01071657.1	sp1 protein	0.00983359
comp186533_c0_seq2	GBRG01071658.1	suppressor of tumorigenicity protein partial	0.0140237
comp186533_c0_seq5	GBRG01071661.1	NA	0.0467626
comp186533_c0_seq6	GBRG01071662.1	NA	0.0593607
comp186541_c0_seq1	GBRG01071701.1	thiomorpholine-carboxylate dehydrogenase	0.0131148
comp186541_c0_seq2	GBRG01071702.1	mu-crystallin homolog	0.0143954
comp186541_c0_seq3	GBRG01071703.1	thiomorpholine-carboxylate dehydrogenase	0.00802139
comp186544_c0_seq1	GBRG01071711.1	c-3 sterol dehydrogenase 3-beta-hydroxysteroid	0.00243457
comp186549_c0_seq1	GBRG01071739.1	SMAD1/5 mothers against decapentaplegic homolog 3-like	0.000555556
comp186561_c0_seq1	GBRG01071826.1	proteasome subunit beta type-6	0.0647321
comp186576_c0_seq1	GBRG01071860.1	chromosome 18 open reading frame 8	0.000418936
comp186580_c0_seq1	GBRG01071869.1	NA	0.0209724
comp186580_c0_seq2	GBRG01071870.1	btb poz domain-containing protein kctd2	0.0222447
comp186617_c3_seq1	GBRG01072080.1	NA	0.00180018
comp186617_c3_seq2	GBRG01072081.1	receptor expression-enhancing protein 2	0.00194269
comp186617_c3_seq3	GBRG01072082.1	isoform j	0.00204499
comp186629_c0_seq1	GBRG01072154.1	proteasome subunit alpha type-6	0.158458
comp186651_c1_seq1	GBRG01072253.1	histone h2b -like	0.130039
comp186660_c0_seq1	GBRG01072279.1	prostaglandin d2 hematopoietic-like	0.00298507
comp186661_c0_seq1	GBRG01251588.1	protein	0.666023
comp186675_c0_seq1	GBRG01072361.1	acyl- thioesterase 7	0.00104657
comp186675_c0_seq2	GBRG01072362.1	acyl- thioesterase 7	0.00106045
comp186698_c0_seq1	GBRG01251587.1	PREDICTED: similar to predicted protein, partial [Hydra magnipapillata]	0.00458015
comp186721_c0_seq5	GBRG01072546.1	protein	0.00104058
comp186733_c1_seq1	GBRG01072618.1	proline-serine-threonine phosphatase-interacting protein 1	0.000621891
comp186733_c1_seq2	GBRG01072619.1	cytidine deaminase	0.00150716
comp186733_c1_seq3	GBRG01072620.1	NA	0.00156863
comp186734_c0_seq1	GBRG01072624.1	NA	0.000557724
comp186746_c0_seq1	GBRG01251741.1	gelsolin-like protein 2-like	0.0539662
comp186755_c0_seq1	GBRG01251585.1	collagen alpha-1 chain precursor	0.156376
comp186774_c0_seq1	GBRG01072840.1	calpain isoform cra_a	0.0027735
comp186790_c0_seq1	GBRG01072908.1	signal peptidase complex catalytic subunit sec11a	0.00138217
comp186810_c0_seq1	GBRG01072956.1	trafficking protein particle complex subunit 4	0.00282008
comp186813_c1_seq1	GBRG01251584.1	dnaj homolog subfamily a member 2	0.0124264
comp186821_c0_seq1	GBRG01073015.1	enoyl- mitochondrial precursor	0.0128824
comp186823_c0_seq1	GBRG01073018.1	NA	0.00395257
comp186823_c0_seq2	GBRG01073019.1	NA	0.00406386
comp186823_c0_seq3	GBRG01073020.1	supervillin- partial	0.00460375
comp186823_c0_seq4	GBRG01073021.1	supervillin- partial	0.00475543
comp186835_c0_seq5	GBRG01073098.1	mchain complex of the 2nd and 3rd lim domains of tes with the evh1 domain of mena and the n-terminal domain of actin-like protein arp7a	0.00286944
comp186835_c0_seq6	GBRG01073099.1	enabled homolog	0.00295203
comp186837_c0_seq1	GBRG01073106.1	NA	0.00361882
comp186837_c0_seq2	GBRG01073107.1	NA	0.00367647
comp186837_c0_seq3	GBRG01073108.1	NA	0.00368098
comp186837_c0_seq4	GBRG01073109.1	NA	0.00372671
comp186837_c0_seq5	GBRG01073110.1	NA	0.00374065
comp186837_c0_seq6	GBRG01073111.1	NA	0.00378788
comp186838_c0_seq1	GBRG01073112.1	hypothetical protein BRAFLDRAFT_124958	0.00295421
comp186841_c0_seq4	GBRG01073121.1	tektin a1	0.00180505
comp186841_c0_seq5	GBRG01073122.1	tektin a1	0.00180505
comp186841_c1_seq1	GBRG01073126.1	tektin a1	0.00090009
comp186845_c0_seq1	GBRG01073161.1	NA	0.000257931
comp186845_c0_seq2	GBRG01073162.1	NA	0.00027049
comp186845_c0_seq3	GBRG01073163.1	collagen alpha-1 chain precursor	0.000285225
comp186845_c0_seq4	GBRG01073164.1	NA	0.000300661
comp186857_c0_seq1	GBRG01251852.1	ribosomal protein l3	0.0320417
comp186880_c0_seq1	GBRG01073315.1	glycosyl family 13 alpha-glucosidase	0.000868056
comp186898_c3_seq1	GBRG01073424.1	single-stranded dna-binding mitochondrial	0.00554785
comp186899_c0_seq1	GBRG01251582.1	calcyclin binding protein	0.00642398
comp186914_c0_seq1	GBRG01073486.1	coiled-coil domain-containing protein 11-like	0.000866176
comp186915_c0_seq1	GBRG01073488.1	crk-like protein	0.0123023
comp186916_c0_seq1	GBRG01073490.1	NA	0.000397772
comp186916_c0_seq2	GBRG01073491.1	NA	0.000781861
comp186924_c1_seq1	GBRG01073523.1	proclotting enzyme-like	0.0107284
comp186930_c0_seq1	GBRG01073553.1	enoyl- hydratase isomerase family protein	0.0130101
comp186956_c0_seq1	GBRG01073697.1	internalin protein	0.00550964
comp186961_c0_seq1	GBRG01073706.1	large subunit gtpase 1 homolog	0.000436872
comp186961_c1_seq1	GBRG01073707.1	NA	0.00882724
comp186961_c1_seq3	GBRG01073709.1	nedd8 precursor	0.0104322
comp186970_c2_seq3	GBRG01073763.1	lectin 1b	0.00704225
comp186976_c5_seq6	GBRG01073816.1	NA	0.00414938
comp186983_c2_seq5	GBRG01073864.1	dolichyl-phosphate mannosyltransferase polypeptide catalytic subunit	0.00438596
comp186993_c0_seq1	GBRG01251731.1	small nuclear ribonucleoprotein sm d1	0.00751315
comp187008_c0_seq1	GBRG01073984.1	aldehyde dehydrogenase 7 member a1	0.0240407
comp187008_c0_seq2	GBRG01073985.1	aldehyde dehydrogenase 7 member a1	0.0242086
comp187008_c0_seq3	GBRG01073986.1	aldehyde dehydrogenase 7 member a1	0.0254279
comp187008_c0_seq4	GBRG01073987.1	aldehyde dehydrogenase 7 member a1	0.0256158
comp187064_c0_seq1	GBRG01074342.1	NA	0.00790167
comp187064_c0_seq2	GBRG01074343.1	NA	0.00963855
comp187068_c0_seq3	GBRG01074360.1	immunoglobulin domain protein	0.0191571
comp187070_c0_seq1	GBRG01074363.1	NA	0.0135593
comp187084_c0_seq1	GBRG01074427.1	atpase asna1	0.00415282
comp187089_c0_seq1	GBRG01074446.1	trna-dihydrouridine synthase 3-like	0.000496771
comp187094_c0_seq1	GBRG01074460.1	follistatin-related protein 5-like	0.00582411
comp187116_c0_seq3	GBRG01074595.1	rna-binding protein 8a	0.00895522
comp187116_c0_seq4	GBRG01074596.1	NA	0.0102041
comp187116_c0_seq5	GBRG01074597.1	rna-binding protein 8a-like	0.0102041
comp187116_c1_seq2	GBRG01074601.1	rna-binding protein 8a	0.0221465
comp187116_c1_seq5	GBRG01074604.1	NA	0.01
comp187116_c1_seq6	GBRG01074605.1	rna-binding protein 8a	0.0102041
comp187128_c0_seq1	GBRG01074675.1	serine racemase	0.0124088
comp187136_c0_seq1	GBRG01074720.1	alpha-1-macroglobulin- partial	0.00448682
comp187136_c0_seq2	GBRG01074721.1	NA	0.00464846
comp187189_c0_seq2	GBRG01251579.1	acyl carrier mitochondrial precursor	0.00897436
comp187202_c1_seq1	GBRG01075075.1	protein o-glucosyltransferase 1-like	0.000495786
comp187209_c0_seq1	GBRG01075121.1	multiple coagulation factor deficiency 2	0.0401837
comp187209_c0_seq2	GBRG01075122.1	multiple coagulation factor deficiency protein 2 homolog	0.0405093
comp187211_c0_seq1	GBRG01075125.1	myeloid leukemia factor 2	0.000708215
comp187222_c0_seq3	GBRG01075157.1	NA	0.0152174
comp187222_c1_seq3	GBRG01075163.1	NA	0.0184697
comp187237_c0_seq1	GBRG01075307.1	eukaryotic translation initiation factor 4e type 3	0.00260643
comp187248_c0_seq1	GBRG01075356.1	upf0587 protein c1orf123 homolog	0.00238379
comp187248_c0_seq2	GBRG01075357.1	upf0587 protein c1orf123 homolog	0.00241546
comp187266_c0_seq1	GBRG01075469.1	ras-related protein rab-22a	0.000962464
comp187269_c0_seq1	GBRG01075489.1	arf-gap with dual ph domain-containing protein 1-like	0.00351288
comp187269_c0_seq2	GBRG01075490.1	arf-gap with dual ph domain-containing protein 1-like	0.00404585
comp187294_c0_seq1	GBRG01075625.1	es1 protein mitochondrial-like isoform 1	0.0645482
comp187318_c0_seq1	GBRG01075779.1	60s ribosome subunit biogenesis protein nip7 homolog	0.00324886
comp187318_c0_seq2	GBRG01075780.1	60s ribosome subunit biogenesis protein nip7 homolog	0.00484496
comp187342_c0_seq1	GBRG01075869.1	gpi-anchor transamidase	0.00144823
comp187342_c0_seq2	GBRG01075870.1	gpi-anchor transamidase-like	0.00153374
comp187343_c0_seq1	GBRG01075871.1	vesicular integral-membrane protein vip36-like	0.0019802
comp187343_c0_seq2	GBRG01075872.1	vesicular integral-membrane protein vip36-like	0.00235664
comp187343_c0_seq6	GBRG01075876.1	lyr motif-containing protein 4	0.00166945
comp187343_c0_seq7	GBRG01075877.1	lyr motif-containing protein 4	0.0016835
comp187354_c0_seq1	GBRG01075928.1	PREDICTED: hypothetical protein [Hydra magnipapillata]	0.00125471
comp187356_c0_seq1	GBRG01075938.1	group 3 secretory phospholipase a2-like	0.00104275
comp187356_c0_seq2	GBRG01075939.1	phospholipase a2	0.00107124
comp187356_c0_seq3	GBRG01075940.1	NA	0.00108755
comp187356_c0_seq4	GBRG01075941.1	NA	0.00111857
comp187365_c1_seq2	GBRG01076005.1	ring domain	0.0155807
comp187389_c0_seq1	GBRG01251883.1	fibrillar collagen	0.267325
comp187391_c0_seq1	GBRG01076209.1	thiopurine s-methyltransferase	0.0320733
comp187420_c0_seq1	GBRG01076434.1	dimethylglycine dehydrogenase	0.0293246
comp187435_c0_seq1	GBRG01076528.1	protein	0.0459184
comp187435_c0_seq2	GBRG01076529.1	protein	0.0841121
comp187443_c0_seq1	GBRG01076636.1	rab-protein 2	0.0234124
comp187443_c0_seq2	GBRG01076637.1	rab-protein 2	0.0302905
comp187455_c0_seq1	GBRG01076669.1	adenylosuccinate synthetase	0.0248092
comp187457_c0_seq1	GBRG01076683.1	melanotransferrin precursor	0.0332574
comp187457_c0_seq2	GBRG01076684.1	low quality protein: melanotransferrin	0.0164863
comp187457_c0_seq3	GBRG01076685.1	melanotransferrin	0.119243
comp187457_c0_seq4	GBRG01076686.1	melanotransferrin precursor	0.1013
comp187461_c1_seq1	GBRG01076703.1	osteoclast-stimulating factor 1	0.00188857
comp187467_c0_seq1	GBRG01251576.1	signal sequence delta	0.0432432
comp187491_c0_seq1	GBRG01076823.1	rhamnospondin 1	0.00208333
comp187495_c0_seq1	GBRG01076860.1	deoxyhypusine hydroxylase	0.000928505
comp187498_c0_seq1	GBRG01076890.1	NA	0.0023753
comp187498_c0_seq2	GBRG01076891.1	intraflagellar transport protein 27 homolog	0.00256739
comp187520_c0_seq1	GBRG01251575.1	transmembrane emp24 domain-containing protein 10 precursor	0.00949094
comp187523_c0_seq1	GBRG01076979.1	guanidinoacetate n-methyltransferase	0.000967118
comp187530_c0_seq1	GBRG01076997.1	NA	0.00771208
comp187530_c0_seq2	GBRG01076998.1	NA	0.0267559
comp187530_c0_seq5	GBRG01077001.1	NA	0.0239234
comp187530_c0_seq6	GBRG01077002.1	NA	0.0328947
comp187547_c0_seq1	GBRG01251570.1	stress-associated endoplasmic reticulum protein 1	0.000549753
comp187547_c0_seq2	GBRG01251569.1	NA	0.00097371
comp187547_c1_seq1	GBRG01000153.1	protein	0.00718276
comp187547_c1_seq2	GBRG01000154.1	protein	0.00825688
comp187550_c0_seq4	GBRG01077090.1	NA	0.0275591
comp187550_c0_seq5	GBRG01077091.1	NA	0.0282258
comp187550_c0_seq6	GBRG01077092.1	NA	0.0282258
comp187550_c2_seq1	GBRG01077096.1	cug-bp- and etr-3-like factor 3	0.0108359
comp187550_c2_seq2	GBRG01077097.1	cugbp elav-like family member 4-like	0.0166667
comp187550_c2_seq6	GBRG01077101.1	NA	0.0282258
comp187573_c0_seq1	GBRG01251568.1	electron transfer flavoprotein subunit beta	0.0824838
comp187592_c0_seq1	GBRG01077302.1	riken cdna 0610007p06 variant 2	0.00308008
comp187601_c0_seq1	GBRG01077351.1	selenoprotein 1	0.000896057
comp187607_c0_seq1	GBRG01077370.1	replication protein a 14 kda subunit	0.00552995
comp187607_c0_seq2	GBRG01077371.1	replication protein a 14 kda subunit	0.00881057
comp187607_c0_seq3	GBRG01077372.1	replication protein a 14 kda subunit	0.0107143
comp187607_c0_seq5	GBRG01077374.1	replication protein a 14 kda subunit	0.0115385
comp187616_c0_seq1	GBRG01251567.1	death-associated protein kinase 3	0.217709
comp187619_c0_seq1	GBRG01077426.1	comm domain-containing protein 8	0.0008285
comp187619_c0_seq2	GBRG01077427.1	NA	0.000876424
comp187624_c1_seq1	GBRG01077445.1	sorbitol dehydrogenase-like	0.00567303
comp187624_c1_seq2	GBRG01077446.1	sorbitol dehydrogenase-like	0.00635471
comp187633_c0_seq1	GBRG01077520.1	NA	0.00356718
comp187637_c0_seq1	GBRG01077559.1	rna-binding protein 12b	0.00554785
comp187637_c0_seq2	GBRG01077560.1	epithelial splicing regulatory protein 2-like	0.00583374
comp187637_c1_seq1	GBRG01077572.1	NA	0.00623053
comp187637_c1_seq2	GBRG01077573.1	NA	0.00814664
comp187638_c0_seq1	GBRG01077590.1	u6 snrna-associated sm-like protein lsm8	0.00299401
comp187648_c0_seq1	GBRG01077638.1	ben domain-containing protein 3-like	0.000588928
comp187658_c4_seq2	GBRG01077678.1	NA	0.000914913
comp187658_c4_seq3	GBRG01077679.1	NA	0.000963391
comp187664_c0_seq1	GBRG01077715.1	exosome complex exonuclease rrp41	0.00220913
comp187670_c1_seq1	GBRG01077769.1	prefoldin subunit 5	0.00585938
comp187670_c3_seq1	GBRG01077783.1	prefoldin subunit 5	0.00585938
comp187683_c0_seq1	GBRG01252169.1	60s ribosomal protein l7-like	0.0341515
comp187683_c0_seq2	GBRG01252170.1	60s ribosomal protein l7	0.0622568
comp187693_c0_seq2	GBRG01077884.1	NA	0.00339559
comp187703_c2_seq11	GBRG01077963.1	NA	0.0197183
comp187722_c4_seq1	GBRG01251296.1	universal stress protein	0.0152575
comp187722_c4_seq2	GBRG01251310.1	universal stress protein	0.0164722
comp187728_c0_seq1	GBRG01078127.1	samd14 protein	0.00324886
comp187740_c0_seq1	GBRG01251564.1	peroxiredoxin 6	0.400199
comp187740_c1_seq1	GBRG01251563.1	peroxiredoxin 6	0.400199
comp187741_c0_seq1	GBRG01000767.1	iron-sulfur cluster assembly enzyme mitochondrial	0.0126126
comp187741_c0_seq2	GBRG01000768.1	iron-sulfur cluster assembly enzyme mitochondrial	0.0126582
comp187751_c1_seq4	GBRG01078226.1	microsomal glutathione s-transferase- isoform a	0.00365408
comp187751_c1_seq5	GBRG01078227.1	microsomal glutathione s-transferase- isoform a	0.00398936
comp187766_c2_seq1	GBRG01078326.1	lim and sh3 domain protein 1	0.0509317
comp187766_c2_seq2	GBRG01078327.1	lim and sh3 domain protein 1	0.05125
comp187766_c2_seq3	GBRG01078328.1	NA	0.0685046
comp187771_c0_seq1	GBRG01078363.1	alanine--glyoxylate aminotransferase 2-like	0.00319616
comp187772_c0_seq1	GBRG01078364.1	guanine nucleotide-binding protein subunit alpha-13	0.00985829
comp187773_c0_seq1	GBRG01251561.1	tropomyosin invertebrate	0.0671429
comp187773_c0_seq2	GBRG01251560.1	tropomyosin	0.20524
comp187795_c0_seq1	GBRG01000160.1	protein	0.0505618
comp187825_c0_seq1	GBRG01078629.1	homeobox prox 1	0.00192308
comp187828_c0_seq1	GBRG01078639.1	pleckstrin homology domain-containing family a member 8-like	0.00889878
comp187832_c2_seq1	GBRG01078654.1	isoform b	0.00213767
comp187832_c2_seq2	GBRG01078655.1	hnrnp protein	0.00215054
comp187832_c2_seq3	GBRG01078656.1	splicing arginine serine-rich 4	0.00233863
comp187832_c2_seq5	GBRG01078658.1	isoform f	0.00519751
comp187832_c2_seq6	GBRG01078659.1	splicing arginine serine-rich 4	0.00546448
comp187841_c0_seq1	GBRG01078726.1	neuroblastoma ras viral oncogene-like protein	0.0108382
comp187841_c0_seq2	GBRG01078727.1	neuroblastoma ras viral oncogene-like protein	0.0109649
comp187850_c0_seq1	GBRG01078747.1	tm2 domain-containing protein cg11103-like	0.00248756
comp187850_c0_seq2	GBRG01078748.1	tm2 domain-containing protein cg11103-like	0.0026455
comp187850_c0_seq3	GBRG01078749.1	NA	0.00335008
comp187859_c0_seq1	GBRG01078783.1	pdz domain-containing protein gipc1-like	0.000630915
comp187870_c0_seq1	GBRG01251559.1	gm2 activator protein	0.0426985
comp187871_c1_seq3	GBRG01078859.1	u6 snrna-associated sm-like protein lsm4-like	0.00501672
comp187871_c1_seq4	GBRG01078860.1	u6 snrna-associated sm-like protein lsm4-like	0.00533808
comp187871_c1_seq8	GBRG01078864.1	NA	0.00983607
comp187871_c1_seq9	GBRG01078865.1	NA	0.00983607
comp187871_c2_seq1	GBRG01078868.1	polymerase delta-interacting protein 2	0.00381194
comp187871_c2_seq2	GBRG01078869.1	polymerase delta-interacting protein 2	0.00673149
comp187871_c3_seq3	GBRG01078878.1	u6 snrna-associated sm-like protein lsm4-like	0.0084507
comp187871_c3_seq4	GBRG01078879.1	u6 snrna-associated sm-like protein lsm4-like	0.00872093
comp187881_c0_seq1	GBRG01078922.1	sjchgc05781 protein	0.00357782
comp187884_c2_seq1	GBRG01078936.1	NA	0.00513611
comp187884_c2_seq2	GBRG01078937.1	NA	0.00516396
comp187884_c2_seq3	GBRG01078938.1	delta-1-pyrroline-5-carboxylate synthase-like	0.00519211
comp187884_c2_seq4	GBRG01078939.1	NA	0.00536769
comp187884_c2_seq5	GBRG01078940.1	NA	0.00539811
comp187884_c2_seq6	GBRG01078941.1	NA	0.00540103
comp187884_c2_seq7	GBRG01078942.1	delta-1-pyrroline-5-carboxylate synthase-like	0.00542888
comp187884_c2_seq8	GBRG01078943.1	delta-1-pyrroline-5-carboxylate synthase-like	0.00543183
comp187884_c2_seq9	GBRG01078944.1	delta-1-pyrroline-5-carboxylate synthase-like	0.00546299
comp187886_c0_seq1	GBRG01078945.1	NA	0.012333
comp187896_c0_seq1	GBRG01078985.1	sorting nexin 6	0.00867209
comp187910_c2_seq4	GBRG01079033.1	ampd2 protein	0.00321027
comp187935_c0_seq1	GBRG01079158.1	NA	0.000682594
comp187936_c0_seq1	GBRG01079159.1	glucose transporter	0.00146771
comp187943_c0_seq1	GBRG01000163.1	microtubule-associated proteins 1a 1b light chain 3c-like	0.00122699
comp187950_c0_seq1	GBRG01079255.1	smoothelin-like protein 1	0.00245776
comp187950_c0_seq2	GBRG01079256.1	smoothelin-like protein 1	0.00249844
comp187950_c0_seq3	GBRG01079257.1	smoothelin-like protein 2	0.00278164
comp187968_c0_seq1	GBRG01251555.1	poly -binding protein 4 isoform c	0.0889047
comp187987_c0_seq1	GBRG01079483.1	sumo-conjugating enzyme ubc9-b	0.00867888
comp187987_c0_seq2	GBRG01079484.1	sumo-conjugating enzyme ubc9-b	0.00878906
comp187992_c0_seq1	GBRG01079505.1	ubiquitin-conjugating enzyme e2-22 kda-like	0.00754717
comp187997_c2_seq1	GBRG01079519.1	aldehyde dehydrogenase 8 member a1	0.0042943
comp187999_c0_seq1	GBRG01079536.1	surfeit locus protein 2	0.00125
comp188002_c0_seq1	GBRG01251554.1	developmentally regulated gtp binding protein 1	0.0189915
comp188002_c0_seq2	GBRG01251553.1	developmentally regulated gtp binding protein 1	0.023539
comp188051_c0_seq1	GBRG01079817.1	isoform cra_c	0.00588928
comp188062_c5_seq1	GBRG01000166.1	n -dimethylarginine dimethylaminohydrolase 1	0.00890076
comp188062_c5_seq10	GBRG01000168.1	n -dimethylarginine dimethylaminohydrolase 1-like	0.0224719
comp188062_c5_seq12	GBRG01000169.1	n -dimethylarginine dimethylaminohydrolase 1-like	0.023166
comp188062_c5_seq3	GBRG01000167.1	n -dimethylarginine dimethylaminohydrolase 1	0.0179325
comp188066_c0_seq1	GBRG01079921.1	synaptophysin	0.0150995
comp188074_c0_seq1	GBRG01079971.1	endoplasmin precursor	0.0861128
comp188074_c0_seq2	GBRG01079972.1	endoplasmin precursor	0.0865854
comp188077_c0_seq1	GBRG01079980.1	PREDICTED: uncharacterized protein CXorf65 homolog	0.000629723
comp188077_c0_seq4	GBRG01079983.1	protein	0.00130378
comp188077_c0_seq5	GBRG01079984.1	protein	0.00158228
comp188100_c0_seq1	GBRG01080097.1	exportin-1	0.00364182
comp188103_c0_seq1	GBRG01080103.1	sarcolemmal membrane-associated protein isoform 2	0.00244598
comp188110_c0_seq1	GBRG01251552.1	ribosomal protein sa	0.0778761
comp188139_c0_seq1	GBRG01000171.1	dna damage-binding protein 1	0.00209864
comp188150_c1_seq1	GBRG01080304.1	rna-binding protein with serine-rich domain 1	0.00455512
comp188150_c2_seq7	GBRG01080312.1	rna-binding protein with serine-rich domain 1	0.0157068
comp188150_c2_seq8	GBRG01080313.1	rna-binding protein with serine-rich domain 1	0.0157895
comp188160_c0_seq1	GBRG01251551.1	atp:adp antiporter	0.325265
comp188170_c0_seq1	GBRG01080443.1	sco-spondin- partial	0.00598802
comp188171_c0_seq1	GBRG01080444.1	transmembrane protein	0.00228833
comp188171_c0_seq2	GBRG01080445.1	transmembrane protein 205	0.00228833
comp188171_c0_seq3	GBRG01080446.1	NA	0.00306279
comp188184_c0_seq1	GBRG01080536.1	NA	0.00792079
comp188184_c0_seq2	GBRG01080537.1	NA	0.00729927
comp188184_c0_seq3	GBRG01080538.1	NA	0.00857143
comp188184_c0_seq5	GBRG01080540.1	NA	0.0106383
comp188191_c0_seq1	GBRG01080571.1	z band alternatively spliced pdz-motif protein isoform j	0.025177
comp188191_c0_seq2	GBRG01080572.1	z band alternatively spliced pdz-motif protein isoform j	0.0244111
comp188194_c0_seq1	GBRG01080586.1	serine protease 27-like	0.00161355
comp188194_c0_seq2	GBRG01080587.1	serine protease 27-like	0.00193143
comp188195_c0_seq1	GBRG01080590.1	programmed cell death 5	0.00334076
comp188198_c0_seq1	GBRG01080598.1	nadh dehydrogenase	0.0408958
comp188200_c1_seq1	GBRG01080608.1	NA	0.00147059
comp188200_c1_seq2	GBRG01080609.1	small nuclear ribonucleoprotein sm d3	0.00192555
comp188200_c1_seq3	GBRG01080610.1	small nuclear ribonucleoprotein sm d3	0.00196721
comp188200_c1_seq5	GBRG01080612.1	small nuclear ribonucleoprotein sm d3	0.00263389
comp188201_c0_seq1	GBRG01080621.1	tetratricopeptide repeat protein 35-like	0.00623053
comp188209_c0_seq1	GBRG01251549.1	phosphoribosyl pyrophosphate synthetase-associated protein 2	0.00145349
comp188209_c0_seq2	GBRG01080654.1	phosphoribosyl pyrophosphate synthetase-associated protein 2	0.00161943
comp188219_c1_seq1	GBRG01080724.1	tricarboxylate transport mitochondrial-like	0.00211416
comp188219_c1_seq2	GBRG01080725.1	solute carrier family 25 (mitochondrial carrier citrate transporter) member 1	0.00215866
comp188235_c0_seq1	GBRG01080804.1	mitogen-activated protein kinase-activated protein kinase 2	0.00692042
comp188241_c0_seq1	GBRG01080831.1	protein	0.00194363
comp188243_c0_seq1	GBRG01080837.1	hypothetical protein BRAFLDRAFT_100558 [Branchiostoma floridae]	0.0324826
comp188243_c0_seq2	GBRG01080838.1	ef-hand domain-containing protein d1	0.0326645
comp188245_c0_seq1	GBRG01080844.1	predicted protein	0.000938967
comp188246_c0_seq1	GBRG01080845.1	NA	0.00155844
comp188246_c0_seq2	GBRG01080846.1	NA	0.00155844
comp188246_c0_seq3	GBRG01080847.1	nedd8-activating enzyme e1 catalytic subunit isoform 2	0.00156986
comp188246_c0_seq4	GBRG01080848.1	ubiquitin-like modifier activating enzyme 3	0.00156986
comp188246_c0_seq5	GBRG01080849.1	NA	0.000553403
comp188246_c0_seq6	GBRG01080850.1	NA	0.000553403
comp188246_c0_seq7	GBRG01080851.1	nedd8-activating enzyme e1 catalytic subunit isoform 2	0.000557724
comp188246_c0_seq8	GBRG01080852.1	nedd8-activating enzyme e1 catalytic subunit isoform 2	0.000557724
comp188260_c0_seq1	GBRG01080917.1	NA	0.00606061
comp188271_c0_seq1	GBRG01080954.1	tyrosine-protein kinase src42a-like isoform 1	0.0102647
comp188271_c0_seq10	GBRG01080963.1	NA	0.00447094
comp188271_c0_seq2	GBRG01080955.1	NA	0.00838457
comp188271_c0_seq3	GBRG01080956.1	tyrosine-protein kinase src42a	0.00870575
comp188271_c0_seq4	GBRG01080957.1	NA	0.00295276
comp188271_c0_seq5	GBRG01080958.1	tyrosine-protein kinase src42a-like isoform 1	0.0030303
comp188271_c0_seq6	GBRG01080959.1	NA	0.00328228
comp188271_c0_seq7	GBRG01080960.1	tyrosine-protein kinase	0.00334448
comp188271_c0_seq9	GBRG01080962.1	tyrosine-protein kinase src42a-like	0.00391134
comp188282_c0_seq1	GBRG01081018.1	dnaj homolog subfamily c member 21	0.00102669
comp188282_c0_seq2	GBRG01081019.1	dnaj homolog subfamily c member 21 isoform 1	0.00102987
comp188282_c0_seq3	GBRG01081020.1	dnaj homolog subfamily c member 21	0.0010433
comp188282_c0_seq4	GBRG01081021.1	NA	0.00104657
comp188301_c0_seq1	GBRG01081118.1	ras-related protein ral-a-like	0.00307031
comp188304_c0_seq1	GBRG01081124.1	epidermal retinol dehydrogenase 2-like	0.00416474
comp188304_c0_seq2	GBRG01081125.1	epidermal retinol dehydrogenase 2-like	0.00422139
comp188314_c0_seq1	GBRG01081208.1	NA	0.00180343
comp188314_c0_seq2	GBRG01081209.1	coiled-coil-helix-coiled-coil-helix domain-containing protein 7	0.00186916
comp188315_c0_seq1	GBRG01251547.1	ras-related c3 botulinum toxin substrate 1	0.0213235
comp188324_c0_seq1	GBRG01081284.1	dual adapter for phosphotyrosine and 3-phosphotyrosine and 3-phosphoinositide-like	0.00657414
comp188324_c0_seq2	GBRG01081285.1	dual adapter for phosphotyrosine and 3-phosphotyrosine and 3-phosphoinositide-like	0.00664697
comp188325_c0_seq1	GBRG01081287.1	protein farnesyltransferase geranylgeranyltransferase type-1 subunit alpha	0.00302801
comp188329_c0_seq1	GBRG01251545.1	elongation factor 1-beta-like	0.00677638
comp188366_c0_seq1	GBRG01081594.1	NA	0.00115652
comp188366_c0_seq2	GBRG01081595.1	NA	0.0011655
comp188374_c0_seq1	GBRG01081650.1	thioredoxin domain containing 4 (endoplasmic reticulum)	0.0205314
comp188396_c1_seq1	GBRG01081752.1	dehydrogenase reductase sdr family member 1	0.00658979
comp188396_c1_seq2	GBRG01081753.1	NA	0.006628
comp188430_c0_seq1	GBRG01081995.1	predicted protein	0.000490677
comp188430_c0_seq2	GBRG01081996.1	NA	0.00140449
comp188454_c0_seq1	GBRG01000178.1	NA	0.0269637
comp188454_c0_seq2	GBRG01251359.1	NA	0.030303
comp188489_c0_seq1	GBRG01082400.1	fibrillin- partial	0.00097371
comp188490_c0_seq1	GBRG01251541.1	transmembrane protease serine 6	0.0625346
comp188490_c0_seq2	GBRG01000180.1	transmembrane protease serine 6	0.092623
comp188503_c1_seq1	GBRG01082483.1	p21-activated protein kinase-interacting protein 1-like	0.000638162
comp188504_c0_seq1	GBRG01082484.1	loc495958 protein	0.01375
comp188511_c0_seq1	GBRG01082526.1	mitochondrial substrate carrier family protein ucpb-like	0.00155642
comp188517_c1_seq1	GBRG01082572.1	matrix metalloproteinase	0.00960828
comp188517_c1_seq2	GBRG01082573.1	NA	0.0101167
comp188517_c1_seq3	GBRG01082574.1	matrix metalloproteinase	0.0101483
comp188517_c1_seq4	GBRG01082575.1	matrix metalloproteinase-24-like	0.0107172
comp188529_c0_seq1	GBRG01082659.1	l-rhamnose-binding lectin partial	0.000746826
comp188529_c0_seq2	GBRG01082660.1	NA	0.00095057
comp188529_c0_seq3	GBRG01082661.1	l-rhamnose-binding lectin partial	0.00117925
comp188529_c0_seq4	GBRG01082662.1	b chain rhamnose-binding lectin csl3	0.00179533
comp188547_c0_seq1	GBRG01251540.1	protein disulfide-isomerase a3 precursor	0.0364004
comp188551_c0_seq1	GBRG01082824.1	NA	0.0131004
comp188551_c0_seq2	GBRG01082825.1	achain the structure of recombinant plasminogen kringle 1 and the fibrin binding site	0.0140449
comp188551_c0_seq3	GBRG01082826.1	NA	0.0198437
comp188551_c0_seq6	GBRG01082829.1	NA	0.00318725
comp188552_c0_seq1	GBRG01082830.1	adp-ribosylation factor 1	0.0274223
comp188559_c0_seq1	GBRG01082869.1	protein	0.00220588
comp188559_c0_seq2	GBRG01082870.1	protein	0.00389105
comp188559_c0_seq3	GBRG01082871.1	NA	0.00490998
comp188560_c0_seq1	GBRG01082876.1	protein	0.00181653
comp188587_c0_seq1	GBRG01083094.1	pancreatic lipase	0.00145666
comp188589_c0_seq1	GBRG01083110.1	protein unc-119 homolog a-like	0.00678733
comp188589_c0_seq2	GBRG01083111.1	unc-119 homolog 2	0.00682335
comp188594_c0_seq1	GBRG01083130.1	synaptosomal-associated protein 25	0.0177903
comp188596_c0_seq1	GBRG01083137.1	3-hydroxyacyl- dehydrogenase type-2-like isoform 1	0.298039
comp188611_c1_seq1	GBRG01251539.1	mitochondrial atp synthase gamma chain	0.0276074
comp188611_c1_seq2	GBRG01000192.1	mitochondrial atp synthase gamma chain	0.0354331
comp188611_c1_seq3	GBRG01000193.1	mitochondrial atp synthase gamma chain	0.0387097
comp188611_c1_seq4	GBRG01000194.1	mitochondrial atp synthase gamma chain	0.00913242
comp188611_c1_seq5	GBRG01000195.1	atp h+ mitochondrial f1 gamma polypeptide 1	0.0193237
comp188619_c0_seq1	GBRG01083323.1	piwi-like protein 1-like	0.0438913
comp188627_c0_seq1	GBRG01083379.1	NA	0.00270088
comp188627_c0_seq2	GBRG01083380.1	NA	0.00282686
comp188631_c0_seq1	GBRG01000196.1	protein ltv1 homolog	0.000587544
comp188638_c0_seq1	GBRG01083435.1	protein	0.00133067
comp188643_c0_seq1	GBRG01251538.1	armet-like protein precursor	0.029204
comp188649_c0_seq1	GBRG01083491.1	n-alpha-acetyltransferase 50	0.00330396
comp188662_c0_seq1	GBRG01083543.1	NA	0.000798977
comp188662_c0_seq2	GBRG01083544.1	rna-binding protein 16	0.000802826
comp188675_c0_seq1	GBRG01083598.1	c-myc binding protein	0.00496278
comp188675_c0_seq2	GBRG01083599.1	c-myc binding protein	0.00505051
comp188677_c0_seq1	GBRG01083603.1	sperm-associated antigen 7 homolog	0.00496524
comp188677_c0_seq2	GBRG01083604.1	sperm-associated antigen 7	0.00535906
comp188677_c0_seq3	GBRG01083605.1	NA	0.0106383
comp188677_c0_seq5	GBRG01083607.1	NA	0.0126263
comp188678_c0_seq1	GBRG01083608.1	zinc knuckle protein	0.00106823
comp188678_c0_seq10	GBRG01083617.1	lim domain containing protein	0.00636943
comp188678_c0_seq11	GBRG01083618.1	lim domain-containing protein 2	0.00729262
comp188678_c0_seq12	GBRG01083619.1	lim domain-containing protein 2	0.00866739
comp188678_c0_seq3	GBRG01083610.1	zinc knuckle protein	0.00119671
comp188678_c0_seq4	GBRG01083611.1	integrase core domain protein	0.00159014
comp188678_c0_seq6	GBRG01083613.1	NA	0.0018926
comp188678_c0_seq7	GBRG01083614.1	lim domain containing protein	0.00608365
comp188678_c0_seq8	GBRG01083615.1	lim domain-containing protein 2	0.00613968
comp188678_c0_seq9	GBRG01083616.1	lim domain containing protein	0.00630915
comp188683_c0_seq1	GBRG01251537.1	d chain the structure of f1-atpase inhibited by	0.594001
comp188688_c0_seq1	GBRG01083665.1	NA	0.00195312
comp188688_c0_seq2	GBRG01083666.1	NA	0.000979432
comp188698_c1_seq1	GBRG01083749.1	polyamine oxidase	0.00107914
comp188702_c0_seq1	GBRG01083767.1	laminin subunit gamma-1	0.0130293
comp188716_c0_seq1	GBRG01083856.1	hepatitis b virus x-interacting protein homolog	0.029987
comp188733_c0_seq1	GBRG01083964.1	protein	0.00239234
comp188754_c0_seq1	GBRG01251536.1	eukaryotic translation initiation factor subunit 5 47kda	0.0188261
comp188755_c0_seq1	GBRG01084055.1	NA	0.00153492
comp188755_c0_seq2	GBRG01084056.1	nucleoside diphosphate-linked moiety x motif 6-like	0.001554
comp188755_c0_seq3	GBRG01084057.1	NA	0.00160901
comp188755_c0_seq4	GBRG01084058.1	nucleoside diphosphate-linked moiety x motif 6	0.00162999
comp188756_c0_seq1	GBRG01251535.1	protein	0.0006035
comp188768_c0_seq1	GBRG01084096.1	serpin b4-like	0.0042005
comp188777_c0_seq1	GBRG01084147.1	NA	0.00193673
comp188777_c0_seq2	GBRG01084148.1	NA	0.00237718
comp188777_c0_seq3	GBRG01000198.1	NA	0.00600858
comp188777_c0_seq4	GBRG01000199.1	NA	0.00729927
comp188777_c0_seq5	GBRG01084149.1	NA	0.00347222
comp188780_c0_seq1	GBRG01084157.1	influenza virus ns1a-binding protein homolog isoform 1	0.000402739
comp188796_c0_seq1	GBRG01251534.1	60s ribosomal protein l10	0.0174897
comp188796_c1_seq1	GBRG01084249.1	protein fam135a-like	0.00131105
comp188818_c0_seq1	GBRG01251532.1	obg-like atpase 1	0.0402341
comp188825_c1_seq1	GBRG01084387.1	ii-fbpl precursor	0.0532955
comp188825_c1_seq2	GBRG01084388.1	NA	0.0567495
comp188833_c0_seq1	GBRG01084461.1	vesicle-associated membrane associated protein b and c	0.00560852
comp188835_c1_seq2	GBRG01084467.1	ubiquitin c	0.865854
comp188835_c1_seq3	GBRG01000201.1	ubiquitin c	0.865854
comp188835_c1_seq4	GBRG01000202.1	ubiquitin c	0.865854
comp188835_c1_seq5	GBRG01084468.1	NA	0.910256
comp188835_c1_seq6	GBRG01084469.1	ubiquitin	0.18894
comp188835_c1_seq7	GBRG01084470.1	NA	0.962963
comp188835_c1_seq8	GBRG01000203.1	NA	0.976526
comp188835_c1_seq9	GBRG01084471.1	NA	0.990476
comp188835_c3_seq2	GBRG01084472.1	synthetic ubiquitin	0.535503
comp188835_c3_seq5	GBRG01084473.1	ubiquitin c	0.910256
comp188835_c3_seq6	GBRG01084474.1	ubiquitin c	0.910256
comp188835_c3_seq7	GBRG01084475.1	ubiquitin isoform cra_e	0.79386
comp188835_c3_seq9	GBRG01084476.1	minor isoform	0.193396
comp188838_c0_seq1	GBRG01084487.1	centrin-1	0.00211864
comp188838_c0_seq2	GBRG01084488.1	NA	0.00235294
comp188838_c0_seq3	GBRG01084489.1	NA	0.00246305
comp188838_c0_seq4	GBRG01084490.1	centrin-2- partial	0.0028463
comp188838_c0_seq5	GBRG01084491.1	centrin-1	0.00300903
comp188843_c0_seq1	GBRG01084528.1	acyl-protein thioesterase 1	0.000938086
comp188843_c0_seq2	GBRG01084529.1	NA	0.00094162
comp188843_c0_seq3	GBRG01084530.1	NA	0.000967118
comp188843_c0_seq4	GBRG01084531.1	NA	0.000970874
comp188843_c0_seq5	GBRG01084532.1	lysophospholipase isoform cra_a	0.000978474
comp188843_c0_seq6	GBRG01084533.1	NA	0.0010101
comp188846_c0_seq1	GBRG01084566.1	nadh dehydrogenase	0.0163462
comp188855_c4_seq1	GBRG01084641.1	comm domain-containing protein 9	0.000874891
comp188861_c0_seq1	GBRG01084661.1	c-1-tetrahydrofolate cytoplasmic	0.0161435
comp188863_c0_seq1	GBRG01084665.1	NA	0.000857265
comp188863_c0_seq3	GBRG01084667.1	NA	0.0011409
comp188864_c0_seq1	GBRG01084669.1	mucin related 89f	0.000544366
comp188864_c0_seq2	GBRG01084670.1	NA	0.000549753
comp188868_c0_seq1	GBRG01084700.1	NA	0.00110254
comp188868_c0_seq2	GBRG01084701.1	rrna-processing protein fcf1 homolog	0.00116414
comp188886_c0_seq1	GBRG01084793.1	isoform cra_a	0.00184706
comp188894_c0_seq1	GBRG01084835.1	2og-fe oxygenase	0.000483092
comp188909_c0_seq1	GBRG01084952.1	protein deltex-2-like	0.000637755
comp188918_c0_seq1	GBRG01085004.1	proteinase inhibitor i4 serpin	0.00881057
comp188919_c0_seq1	GBRG01251948.1	glutathione reductase	0.0120296
comp188922_c0_seq1	GBRG01085015.1	ras-related protein rab-26-like	0.00795756
comp188924_c0_seq1	GBRG01085022.1	protein mago nashi homolog	0.00928382
comp188924_c0_seq2	GBRG01085023.1	protein mago nashi homolog	0.0104167
comp188926_c1_seq1	GBRG01085030.1	PREDICTED: hypothetical protein LOC100634692 [Amphimedon queenslandica]	0.0015625
comp188926_c1_seq2	GBRG01085031.1	NA	0.00157356
comp188926_c1_seq3	GBRG01085032.1	NA	0.00158103
comp188926_c1_seq4	GBRG01085033.1	NA	0.00289226
comp188926_c1_seq5	GBRG01085034.1	PREDICTED: hypothetical protein LOC100634692 [Amphimedon queenslandica]	0.00343053
comp188928_c0_seq1	GBRG01085047.1	tnf receptor-associated factor 4	0.00491918
comp188928_c0_seq2	GBRG01085048.1	tnf receptor associated factor	0.00439239
comp188933_c0_seq1	GBRG01085070.1	ef hand domain protein	0.00110681
comp188933_c0_seq2	GBRG01085071.1	ef hand domain protein	0.00111173
comp188933_c0_seq3	GBRG01085072.1	ef hand domain protein	0.00112486
comp188933_c0_seq4	GBRG01085073.1	ef hand domain protein	0.00138793
comp188942_c0_seq1	GBRG01085113.1	proteasome subunit beta type-1-a	0.00534759
comp188942_c0_seq2	GBRG01085114.1	proteasome subunit beta type 1-a	0.0462963
comp188942_c1_seq1	GBRG01085115.1	proteasome subunit beta type 1-a	0.0759346
comp188943_c0_seq2	GBRG01085117.1	protein lsm12 homolog	0.004995
comp188946_c1_seq1	GBRG01085130.1	glutathione s-transferase	0.00163666
comp188946_c1_seq2	GBRG01085131.1	glutathione s-transferase	0.00374532
comp188947_c0_seq1	GBRG01085137.1	cdc42 small effector protein 2	0.00352941
comp188953_c0_seq1	GBRG01085190.1	NA	0.00147059
comp188953_c0_seq2	GBRG01085191.1	NA	0.00149477
comp188953_c0_seq3	GBRG01085192.1	NA	0.00151286
comp188953_c0_seq4	GBRG01085193.1	NA	0.00164204
comp188953_c0_seq5	GBRG01085194.1	NA	0.00180832
comp188953_c0_seq6	GBRG01085195.1	NA	0.00240964
comp188960_c0_seq1	GBRG01085231.1	breast carcinoma amplified sequence 2	0.00334728
comp188960_c0_seq2	GBRG01085232.1	breast carcinoma amplified sequence 2	0.00371402
comp188968_c0_seq1	GBRG01085271.1	bone morphogenetic protein 1-like	0.00428367
comp188979_c0_seq1	GBRG01085322.1	ribosomal protein s12	0.0020284
comp188991_c1_seq1	GBRG01085396.1	ubiquitin fusion degradation protein 1 homolog	0.005997
comp188994_c0_seq1	GBRG01085413.1	NA	0.0027027
comp189005_c0_seq1	GBRG01085471.1	mms19 nucleotide excision repair protein homolog	0.000293341
comp189012_c1_seq1	GBRG01251951.1	NA	0.00208551
comp189012_c1_seq12	GBRG01251962.1	NA	0.00234834
comp189012_c1_seq14	GBRG01251964.1	NA	0.00237436
comp189012_c1_seq19	GBRG01085518.1	fus interacting protein (serine arginine-rich) 1	0.00607903
comp189012_c1_seq2	GBRG01251952.1	NA	0.002106
comp189012_c1_seq3	GBRG01251953.1	NA	0.00212239
comp189012_c1_seq4	GBRG01251954.1	NA	0.00214362
comp189012_c1_seq5	GBRG01251955.1	NA	0.00216138
comp189012_c1_seq6	GBRG01251956.1	NA	0.00218341
comp189016_c0_seq1	GBRG01085538.1	glycine n-methyltransferase	0.0138581
comp189025_c1_seq1	GBRG01085595.1	frizzled homolog 7a	0.00754717
comp189026_c0_seq1	GBRG01085598.1	lysyl oxidase homolog 2-like	0.00761325
comp189035_c0_seq1	GBRG01085663.1	o- family 3	0.0189831
comp189035_c0_seq2	GBRG01085664.1	o- family 3	0.019297
comp189035_c0_seq3	GBRG01085665.1	caffeoyl- o-methyltransferase	0.0265655
comp189035_c0_seq4	GBRG01085666.1	NA	0.0283688
comp189056_c0_seq1	GBRG01085789.1	protein nhl-1	0.099665
comp189057_c0_seq1	GBRG01085790.1	fibroblast growth factor receptor	0.0018105
comp189060_c1_seq3	GBRG01085803.1	NA	0.0042735
comp189060_c2_seq1	GBRG01085804.1	NA	0.00149925
comp189068_c0_seq1	GBRG01085865.1	NA	0.111888
comp189068_c0_seq2	GBRG01085866.1	proliferating cell nuclear antigen	0.113916
comp189079_c0_seq1	GBRG01085912.1	chromosome 21 open reading frame 2	0.000783699
comp189091_c0_seq1	GBRG01085989.1	dipeptidyl-peptidase 7	0.00956023
comp189091_c0_seq2	GBRG01085990.1	dipeptidyl-peptidase 7	0.0105764
comp189091_c0_seq3	GBRG01085991.1	NA	0.00796601
comp189091_c0_seq4	GBRG01085992.1	NA	0.00891795
comp189091_c0_seq5	GBRG01085993.1	NA	0.00811808
comp189091_c0_seq6	GBRG01085994.1	dipeptidyl-peptidase 7	0.0052356
comp189094_c0_seq2	GBRG01086006.1	glutathione peroxidase 1	0.00254194
comp189094_c0_seq3	GBRG01086007.1	glutathione peroxidase 1	0.00285388
comp189098_c1_seq5	GBRG01086030.1	enoyl- hydratase isomerase	0.00144509
comp189098_c2_seq1	GBRG01086043.1	enoyl- hydratase carnithine racemase	0.00147493
comp189105_c0_seq1	GBRG01086080.1	NA	0.000705716
comp189105_c0_seq2	GBRG01086081.1	NA	0.00078125
comp189115_c0_seq1	GBRG01086166.1	importin subunit alpha-7-like	0.00240964
comp189115_c0_seq2	GBRG01086167.1	NA	0.00245218
comp189120_c0_seq1	GBRG01251968.1	transcriptional regulator	0.000759301
comp189161_c1_seq2	GBRG01086544.1	NA	0.00190961
comp189161_c1_seq3	GBRG01086545.1	protein	0.00192308
comp189165_c0_seq1	GBRG01086566.1	vesicle-trafficking protein sec22a	0.00661521
comp189165_c0_seq2	GBRG01086567.1	NA	0.00675676
comp189168_c1_seq1	GBRG01251973.1	vasa-like protein	0.0141371
comp189168_c1_seq2	GBRG01251974.1	vasa-like protein	0.0179303
comp189176_c0_seq1	GBRG01086615.1	dna-directed rna polymerases and iii subunit rpabc1-like	0.00594648
comp189189_c1_seq1	GBRG01086720.1	NA	0.074
comp189189_c1_seq2	GBRG01086721.1	mechanosensory protein 2-like	0.086516
comp189189_c1_seq3	GBRG01086722.1	mechanosensory protein 2-like	0.0904645
comp189189_c1_seq4	GBRG01086723.1	protein mec- isoform b	0.0906863
comp189189_c1_seq5	GBRG01086724.1	mechanosensory protein 2-like	0.0145455
comp189189_c1_seq6	GBRG01086725.1	prohibitins and stomatins of the pid partial	0.0197368
comp189189_c1_seq7	GBRG01086726.1	mechanosensory protein 2-like	0.0218579
comp189195_c0_seq1	GBRG01086759.1	dihydrofolate reductase	0.0027027
comp189195_c0_seq2	GBRG01086760.1	dihydrofolate reductase	0.00315457
comp189195_c0_seq3	GBRG01086761.1	dihydrofolate reductase	0.00324675
comp189206_c0_seq1	GBRG01086803.1	collagen alpha-4 chain- partial	0.103861
comp189206_c0_seq11	GBRG01086813.1	NA	0.864151
comp189206_c0_seq12	GBRG01086814.1	NA	1.66667
comp189206_c0_seq2	GBRG01086804.1	NA	0.104513
comp189206_c0_seq3	GBRG01086805.1	collagen alpha-4 chain- partial	0.0988019
comp189206_c0_seq9	GBRG01086811.1	NA	0.838828
comp189210_c0_seq1	GBRG01086850.1	protein	0.0214626
comp189215_c0_seq1	GBRG01086892.1	vitelline membrane outer layer protein 1 homolog	0.0117155
comp189220_c0_seq1	GBRG01086921.1	vacuolar h	0.0057995
comp189231_c0_seq1	GBRG01086969.1	tho complex subunit 3	0.000995025
comp189233_c1_seq1	GBRG01086979.1	protein tweety homolog 2-like	0.000736106
comp189233_c1_seq2	GBRG01086980.1	protein tweety homolog 2-like	0.000739372
comp189233_c1_seq3	GBRG01086981.1	protein tweety homolog 2-like	0.000756144
comp189233_c1_seq4	GBRG01086982.1	protein tweety homolog 2	0.00075959
comp189235_c0_seq1	GBRG01086992.1	succinate dehydrogenase iron-sulfur mitochondrial precursor	0.00754976
comp189239_c0_seq1	GBRG01087002.1	n-myc downstream regulated	0.00986651
comp189248_c0_seq1	GBRG01087041.1	exosome complex exonuclease rrp40	0.00114548
comp189254_c0_seq1	GBRG01087057.1	hemicentin 1	0.0209235
comp189265_c0_seq1	GBRG01087126.1	aryl hydrocarbon receptor interacting protein	0.0032345
comp189267_c1_seq1	GBRG01087130.1	four and a half lim domains protein 5 isoform 1	0.000546747
comp189276_c0_seq1	GBRG01087185.1	protein	0.00564972
comp189276_c0_seq2	GBRG01087186.1	myophilin-like	0.00811124
comp189278_c0_seq1	GBRG01087206.1	retinol dehydrogenase 8-like	0.0205438
comp189279_c0_seq1	GBRG01087207.1	ubiquitin carboxyl-terminal hydrolase l5	0.0135458
comp189281_c1_seq1	GBRG01087215.1	NA	0.00292113
comp189281_c1_seq10	GBRG01087224.1	NA	0.0107527
comp189287_c0_seq1	GBRG01251519.1	glutathione s-transferase mu 3	0.0676056
comp189288_c0_seq1	GBRG01087290.1	nuclear transcription factor y subunit alpha	0.00996441
comp189290_c0_seq1	GBRG01087317.1	uracil phosphoribosyltransferase	0.000703235
comp189292_c1_seq1	GBRG01087321.1	NA	0.0347633
comp189292_c1_seq2	GBRG01087322.1	gtp-binding nuclear protein ran	0.0359602
comp189292_c1_seq3	GBRG01087323.1	NA	0.03642
comp189292_c1_seq4	GBRG01087324.1	gtp-binding nuclear protein ran	0.0412824
comp189292_c1_seq5	GBRG01087325.1	gtp-binding nuclear protein ran	0.0699926
comp189292_c1_seq6	GBRG01087326.1	gtp-binding nuclear protein ran	0.0783333
comp189297_c0_seq1	GBRG01087426.1	vesicle-associated membrane protein 7	0.00231303
comp189297_c0_seq2	GBRG01087427.1	vesicle-associated membrane protein 7	0.00243704
comp189297_c0_seq3	GBRG01087428.1	NA	0.00246305
comp189297_c0_seq4	GBRG01087429.1	vesicle-associated membrane protein 7	0.00236967
comp189297_c0_seq5	GBRG01087430.1	NA	0.00247219
comp189297_c0_seq7	GBRG01087432.1	NA	0.00269179
comp189297_c0_seq8	GBRG01087433.1	NA	0.00273973
comp189298_c0_seq1	GBRG01251518.1	zinc metalloproteinase nas-13-like	0.0171885
comp189298_c0_seq2	GBRG01251517.1	protein	0.0173375
comp189310_c0_seq1	GBRG01087523.1	NA	0.0355064
comp189310_c0_seq2	GBRG01087524.1	cysteine and glycine-rich protein 1	0.0356308
comp189320_c0_seq1	GBRG01087565.1	proteasome subunit alpha type-4	0.0507996
comp189322_c0_seq1	GBRG01087584.1	NA	0.000825083
comp189322_c0_seq2	GBRG01087585.1	NA	0.000886525
comp189322_c0_seq3	GBRG01087586.1	NA	0.00121212
comp189335_c0_seq1	GBRG01087701.1	NA	0.00137457
comp189335_c0_seq2	GBRG01087702.1	NA	0.00137646
comp189335_c0_seq3	GBRG01087703.1	protein max-like isoform 1	0.00137931
comp189335_c0_seq4	GBRG01087704.1	NA	0.00138122
comp189335_c0_seq5	GBRG01087705.1	NA	0.00140944
comp189335_c0_seq6	GBRG01087706.1	NA	0.00141143
comp189335_c0_seq7	GBRG01087707.1	NA	0.00141443
comp189335_c0_seq8	GBRG01087708.1	NA	0.00141643
comp189336_c0_seq1	GBRG01087717.1	nuclear transcription factor beta	0.000392619
comp189337_c0_seq1	GBRG01087720.1	NA	0.000368868
comp189337_c0_seq2	GBRG01087721.1	NA	0.000437063
comp189337_c0_seq3	GBRG01087722.1	NA	0.000518672
comp189337_c0_seq4	GBRG01087723.1	NA	0.000578035
comp189337_c0_seq5	GBRG01087724.1	NA	0.000616523
comp189337_c0_seq6	GBRG01087725.1	NA	0.000834028
comp189337_c0_seq8	GBRG01087727.1	NA	0.0011919
comp189337_c0_seq9	GBRG01087728.1	NA	0.00156006
comp189370_c0_seq1	GBRG01251516.1	astacin 3	0.0260814
comp189370_c1_seq1	GBRG01251515.1	astacin 3	0.0278722
comp189370_c1_seq2	GBRG01251574.1	zinc metalloproteinase nas-13-like	0.0293066
comp189370_c1_seq3	GBRG01087920.1	NA	0.0185615
comp189372_c1_seq1	GBRG01087957.1	plasma kallikrein	0.00321226
comp189385_c0_seq1	GBRG01088040.1	prolyl-trna synthetase associated domain-containing protein 1-like	0.00310078
comp189385_c1_seq1	GBRG01088042.1	prolyl-trna synthetase associated domain-containing protein 1-like	0.00307692
comp189389_c0_seq1	GBRG01088053.1	phospholipid scramblase 2-like	0.00409417
comp189392_c0_seq1	GBRG01088061.1	protein	0.000413394
comp189392_c0_seq2	GBRG01088062.1	protein	0.000436491
comp189400_c0_seq1	GBRG01088104.1	comm domain-containing protein 10	0.00135135
comp189400_c0_seq2	GBRG01088105.1	comm domain-containing protein 10	0.00179211
comp189409_c0_seq1	GBRG01088157.1	dynactin 5 p25	0.00134228
comp189414_c0_seq1	GBRG01088175.1	ShK domain-like	0.00363372
comp189414_c0_seq2	GBRG01088176.1	protein	0.00367377
comp189441_c0_seq1	GBRG01088354.1	ras-related protein rab-24	0.000722022
comp189447_c0_seq1	GBRG01088386.1	cytochrome b5 domain containing 2	0.00239425
comp189447_c0_seq2	GBRG01088387.1	NA	0.002849
comp189450_c0_seq1	GBRG01088392.1	cbp80 20-dependent translation initiation factor-like	0.00136054
comp189450_c0_seq2	GBRG01088393.1	cbp80 20-dependent translation initiation factor	0.00156986
comp189450_c0_seq3	GBRG01088394.1	cbp80 20-dependent translation initiation factor	0.0016488
comp189450_c0_seq4	GBRG01088395.1	NA	0.00187266
comp189450_c0_seq5	GBRG01088396.1	NA	0.00229358
comp189450_c0_seq6	GBRG01088397.1	NA	0.00246609
comp189460_c0_seq1	GBRG01088462.1	low quality protein: prkc apoptosis wt1 regulator	0.00123533
comp189467_c0_seq1	GBRG01088501.1	signal recognition particle 9 kda protein	0.00410397
comp189467_c0_seq2	GBRG01088502.1	signal recognition particle 9 kda protein	0.00423729
comp189478_c0_seq1	GBRG01088566.1	rib43a-like with coiled-coils protein 2-like	0.0037037
comp189480_c0_seq1	GBRG01088568.1	oxysterol binding 9	0.000998004
comp189483_c0_seq1	GBRG01088574.1	retinol dehydrogenase 11-like	0.0194332
comp189486_c1_seq2	GBRG01088586.1	coiled-coil domain-containing protein 124	0.0202429
comp189487_c0_seq2	GBRG01088590.1	NA	0.00321027
comp189505_c0_seq1	GBRG01088694.1	myosin regulatory light polypeptide 9	0.33526
comp189505_c0_seq2	GBRG01088695.1	myosin regulatory light polypeptide 9	0.338192
comp189505_c0_seq3	GBRG01088696.1	myosin regulatory light polypeptide 9	0.34262
comp189505_c0_seq4	GBRG01251508.1	myosin regulatory light polypeptide 9	0.511002
comp189517_c0_seq1	GBRG01088760.1	protein phosphatase 1 regulatory subunit 14c-like	0.00247066
comp189517_c0_seq2	GBRG01088761.1	protein phosphatase 1 regulatory subunit 14c-like	0.00333611
comp189517_c0_seq3	GBRG01088762.1	protein phosphatase 1 regulatory subunit 14c-like	0.00394867
comp189520_c0_seq1	GBRG01251507.1	n-acyl-phosphatidylethanolamine-hydrolyzing phospholipase d	0.0583333
comp189526_c0_seq1	GBRG01251506.1	spermidine synthase	0.000808407
comp189526_c0_seq2	GBRG01251505.1	spermidine synthase	0.0008726
comp189533_c0_seq1	GBRG01088832.1	lactotransferrin precursor	0.0502283
comp189539_c0_seq1	GBRG01088863.1	NA	0.00157916
comp189539_c0_seq2	GBRG01088864.1	pericentriolar material 1	0.00158856
comp189539_c0_seq3	GBRG01088865.1	NA	0.00200803
comp189539_c0_seq4	GBRG01088866.1	NA	0.00202327
comp189558_c0_seq1	GBRG01088988.1	h aca ribonucleoprotein complex subunit 4	0.0031348
comp189559_c0_seq1	GBRG01088989.1	methylthioribose-1-phosphate isomerase-like	0.00212164
comp189569_c0_seq1	GBRG01089038.1	calcium-binding protein 39	0.00128452
comp189573_c0_seq1	GBRG01089046.1	nucleolar protein 4	0.00106952
comp189573_c0_seq2	GBRG01089047.1	NA	0.002079
comp189595_c3_seq1	GBRG01000224.1	Hemicentin-2	0.0477924
comp189595_c4_seq1	GBRG01000225.1	protein	0.0477056
comp189595_c4_seq2	GBRG01000226.1	protein	0.0487918
comp189595_c4_seq3	GBRG01000227.1	NA	0.0487918
comp189606_c0_seq1	GBRG01089199.1	neuro-oncological ventral antigen 1	0.0193798
comp189607_c0_seq1	GBRG01089200.1	selenocysteine-specific elongation factor	0.00265675
comp189608_c0_seq1	GBRG01089201.1	hypothetical protein TRIADDRAFT_54443	0.00123001
comp189611_c0_seq1	GBRG01251501.1	proteasome ( macropain) alpha 5	0.0869231
comp189613_c0_seq1	GBRG01089233.1	udp-glucose pyrophosphorylase 2	0.00770925
comp189613_c0_seq2	GBRG01089234.1	NA	0.00782123
comp189613_c0_seq3	GBRG01089235.1	utp--glucose-1-phosphate uridylyltransferase	0.0066778
comp189613_c0_seq4	GBRG01089236.1	NA	0.00883392
comp189613_c0_seq5	GBRG01089237.1	NA	0.00915751
comp189613_c0_seq6	GBRG01089238.1	NA	0.00915751
comp189613_c0_seq7	GBRG01089239.1	udp-glucose pyrophosphorylase 2	0.00609756
comp189613_c1_seq1	GBRG01089245.1	udp-glucose pyrophosphorylase 2	0.0078125
comp189613_c1_seq10	GBRG01089254.1	utp--glucose-1-phosphate uridylyltransferase-like	0.00766284
comp189613_c1_seq11	GBRG01089255.1	udp-glucose pyrophosphorylase 2	0.00787402
comp189613_c1_seq2	GBRG01089246.1	NA	0.00591716
comp189613_c1_seq3	GBRG01089247.1	NA	0.00591716
comp189613_c1_seq4	GBRG01089248.1	utp--glucose-1-phosphate uridylyltransferase-like	0.00617284
comp189613_c1_seq9	GBRG01089253.1	NA	0.00766284
comp189623_c1_seq1	GBRG01089306.1	PREDICTED: hypothetical protein [Hydra magnipapillata]	0.0129991
comp189625_c0_seq1	GBRG01089311.1	mgc89871 protein	0.00312012
comp189627_c1_seq1	GBRG01089315.1	phd finger-like domain-containing protein 5a	0.00789474
comp189631_c0_seq1	GBRG01089342.1	upf0414 transmembrane protein c20orf30 homolog	0.00101937
comp189631_c0_seq2	GBRG01089343.1	upf0414 transmembrane protein c20orf30 homolog	0.00103896
comp189639_c0_seq1	GBRG01089391.1	NA	0.00121877
comp189639_c0_seq2	GBRG01089392.1	NA	0.00122699
comp189639_c0_seq3	GBRG01089393.1	cd151 molecule (raph blood group)	0.00201005
comp189639_c0_seq4	GBRG01089394.1	NA	0.00203252
comp189649_c2_seq10	GBRG01251500.1	neurocalcin homolog	0.0768421
comp189649_c2_seq11	GBRG01251499.1	neurocalcin homolog	0.0768421
comp189649_c2_seq14	GBRG01000228.1	neurocalcin homolog	0.0366197
comp189658_c6_seq1	GBRG01089538.1	member ras oncogene family	0.0062435
comp189658_c6_seq2	GBRG01089539.1	member ras oncogene family	0.00918836
comp189658_c6_seq3	GBRG01089540.1	NA	0.0116009
comp189658_c6_seq4	GBRG01089541.1	ras-related protein rab-18-like	0.0134771
comp189658_c6_seq5	GBRG01089542.1	NA	0.0147493
comp189658_c6_seq6	GBRG01089543.1	member ras oncogene family	0.015015
comp189660_c0_seq1	GBRG01089556.1	viral iap-associated factor homolog	0.00125865
comp189670_c0_seq1	GBRG01089595.1	mitochondrial ribosomal protein s18b	0.00237342
comp189704_c1_seq1	GBRG01089869.1	dek oncogene	0.0326449
comp189704_c1_seq2	GBRG01089870.1	dek oncogene	0.0363771
comp189706_c0_seq1	GBRG01251498.1	eukaryotic translation initiation factor 3 subunit d	0.0132743
comp189716_c0_seq1	GBRG01089952.1	26s proteasome non-atpase regulatory subunit 14	0.0432473
comp189719_c1_seq1	GBRG01251497.1	histone acetyltransferase kat5-like isoform 2	0.000381534
comp189724_c0_seq1	GBRG01089979.1	5 -amp-activated protein kinase subunit beta-2	0.00383509
comp189732_c0_seq1	GBRG01090029.1	cell division control protein 2 homolog	0.00075188
comp189735_c0_seq1	GBRG01090051.1	methyltransferase-like protein 14	0.00102775
comp189736_c1_seq1	GBRG01251486.1	s-adenosylmethionine synthase isoform type-2	0.0749863
comp189736_c1_seq2	GBRG01251496.1	s-adenosylmethionine synthase isoform type-2	0.0802578
comp189742_c0_seq1	GBRG01090097.1	matrix metalloproteinase-15	0.0147826
comp189742_c0_seq12	GBRG01090108.1	NA	0.0747253
comp189742_c0_seq2	GBRG01090098.1	matrix metalloproteinase-15	0.0149451
comp189742_c0_seq3	GBRG01090099.1	NA	0.0195066
comp189742_c0_seq4	GBRG01090100.1	NA	0.0273532
comp189742_c0_seq7	GBRG01090103.1	NA	0.0297463
comp189742_c0_seq8	GBRG01090104.1	72 kda type iv collagenase-like	0.0472727
comp189748_c0_seq1	GBRG01090127.1	nuclear receptor subfamily group member 1	0.000738371
comp189748_c0_seq2	GBRG01090128.1	NA	0.000769625
comp189750_c0_seq1	GBRG01251494.1	nascent polypeptide-associated complex subunit alpha	0.132856
comp189757_c2_seq1	GBRG01090204.1	thap domain-containing protein 9-like	0.00260643
comp189757_c2_seq2	GBRG01090205.1	mgc53213 protein	0.0036855
comp189757_c2_seq3	GBRG01090206.1	mgc53213 protein	0.00369914
comp189759_c0_seq1	GBRG01090217.1	multicopper oxidase	0.00103164
comp189763_c0_seq1	GBRG01090235.1	coiled-coil domain-containing protein 96	0.00168634
comp189764_c0_seq1	GBRG01090237.1	30s ribosomal protein s11	0.00191327
comp189764_c0_seq2	GBRG01090238.1	30s ribosomal protein s11	0.00292969
comp189764_c0_seq3	GBRG01090239.1	30s ribosomal protein s11	0.00321199
comp189770_c0_seq1	GBRG01090278.1	rab-like protein 5	0.000759878
comp189770_c0_seq2	GBRG01090279.1	rab-like protein 5	0.000777001
comp189774_c0_seq1	GBRG01090303.1	NA	0.00133422
comp189774_c0_seq5	GBRG01090307.1	duf1772-domain-containing protein	0.00292826
comp189796_c0_seq1	GBRG01090437.1	atp-dependent rna helicase a	0.00635324
comp189807_c0_seq1	GBRG01090544.1	NA	0.00308325
comp189807_c0_seq2	GBRG01090545.1	NA	0.00314136
comp189807_c0_seq3	GBRG01090546.1	NA	0.00502513
comp189809_c0_seq3	GBRG01090552.1	neuronal pentraxin 1-like	0.00207039
comp189809_c1_seq1	GBRG01090555.1	bryohealin precursor	0.0274223
comp189825_c0_seq1	GBRG01090655.1	collagen type iv alpha-3-binding protein	0.0016214
comp189828_c0_seq1	GBRG01090739.1	protein gtlf3b	0.00193798
comp189830_c0_seq1	GBRG01000233.1	26s protease regulatory subunit 8	0.0121212
comp189862_c2_seq1	GBRG01090951.1	protein arginine n-methyltransferase 1	0.0126002
comp189869_c1_seq1	GBRG01090986.1	ethylmalonic encephalopathy 1	0.0720562
comp189872_c0_seq1	GBRG01091000.1	aminoacyl trna synthase complex-interacting multifunctional protein 2	0.00576606
comp189873_c0_seq1	GBRG01091001.1	NA	0.00288184
comp189886_c0_seq1	GBRG01091139.1	charged multivesicular body protein 5	0.00208333
comp189886_c0_seq2	GBRG01091140.1	charged multivesicular body protein 5	0.00243309
comp189910_c0_seq1	GBRG01091262.1	sideroflexin 2	0.00914634
comp189915_c1_seq1	GBRG01091287.1	exosome complex component csl4-like isoform 1	0.000935454
comp189915_c1_seq2	GBRG01091288.1	exosome component 1	0.000959693
comp189915_c1_seq5	GBRG01091291.1	exosome component 1	0.00128535
comp189915_c1_seq6	GBRG01091292.1	NA	0.00133156
comp189916_c0_seq1	GBRG01091301.1	rrna 2 -o-methyltransferase fibrillarin-like	0.0462185
comp189916_c0_seq2	GBRG01091302.1	rrna 2 -o-methyltransferase fibrillarin-like	0.046875
comp189927_c0_seq1	GBRG01091348.1	nadh-ubiquinone oxidoreductase b12	0.000600962
comp189930_c0_seq1	GBRG01091356.1	NA	0.0591017
comp189930_c0_seq2	GBRG01091357.1	NA	0.0625
comp189930_c0_seq3	GBRG01091358.1	NA	0.0652742
comp189941_c0_seq1	GBRG01091422.1	mps one binder kinase activator-like 3	0.00505051
comp189941_c0_seq2	GBRG01091423.1	mps one binder kinase activator-like 3	0.00507099
comp189941_c1_seq1	GBRG01091424.1	transformer-2 protein homolog beta isoform 2	0.00112486
comp189941_c1_seq2	GBRG01091425.1	transformer-2 protein homolog beta	0.00114943
comp189945_c0_seq1	GBRG01091449.1	NA	0.000818331
comp189945_c0_seq2	GBRG01091450.1	NA	0.000823723
comp189947_c2_seq1	GBRG01251490.1	clathrin light chain a	0.0100503
comp189947_c2_seq5	GBRG01251489.1	clathrin light chain a	0.0227273
comp189948_c0_seq1	GBRG01091472.1	phosphomannomutase 2	0.0245262
comp189948_c0_seq2	GBRG01091473.1	NA	0.02019
comp189952_c2_seq1	GBRG01091487.1	helicase mov-10	0.00118765
comp189952_c2_seq2	GBRG01091488.1	NA	0.0014556
comp189956_c0_seq1	GBRG01091509.1	multiple pdz domain protein	0.00133541
comp189956_c0_seq2	GBRG01091510.1	NA	0.000713267
comp189959_c0_seq1	GBRG01091514.1	ubiquitin-like-conjugating enzyme atg3	0.00477707
comp189959_c0_seq2	GBRG01091515.1	ubiquitin-like-conjugating enzyme atg3	0.00541028
comp189964_c0_seq1	GBRG01091562.1	NA	0.000428449
comp189979_c0_seq1	GBRG01091645.1	ribonuclease oy-like	0.0134831
comp189979_c0_seq2	GBRG01091646.1	NA	0.0145044
comp189979_c0_seq3	GBRG01091647.1	ribonuclease oy-like	0.0196507
comp189981_c1_seq1	GBRG01091662.1	NA	0.00257637
comp189981_c1_seq2	GBRG01091663.1	protein	0.00262074
comp189981_c1_seq3	GBRG01091664.1	protein	0.00278884
comp189989_c0_seq1	GBRG01091712.1	ubx domain-containing protein 7	0.000990099
comp189989_c0_seq2	GBRG01091713.1	ubx domain-containing protein 7	0.00102302
comp190004_c2_seq1	GBRG01091821.1	heterogeneous nuclear ribonucleoprotein u-like protein 1-like	0.00559701
comp190004_c2_seq2	GBRG01091822.1	heterogeneous nuclear ribonucleoprotein u	0.0190892
comp190004_c2_seq3	GBRG01091823.1	heterogeneous nuclear ribonucleoprotein u	0.0193852
comp190005_c0_seq1	GBRG01091827.1	beta-adrenergic receptor kinase 2	0.00257898
comp190006_c0_seq1	GBRG01091828.1	moco sulphurase c-terminal domain containing 2	0.00116212
comp190007_c0_seq1	GBRG01091829.1	vesicle-associated membrane protein 3	0.00759878
comp190010_c0_seq1	GBRG01091848.1	NA	0.00299222
comp190010_c0_seq2	GBRG01091849.1	parkin co-regulated gene protein	0.00302847
comp190010_c0_seq3	GBRG01091850.1	NA	0.00311721
comp190010_c0_seq4	GBRG01091851.1	NA	0.00315657
comp190010_c0_seq5	GBRG01091852.1	parkin co-regulated gene protein	0.00364964
comp190010_c0_seq6	GBRG01091853.1	parkin coregulated gene	0.0037037
comp190013_c3_seq1	GBRG01091878.1	hermansky-pudlak syndrome 3 protein	0.000444346
comp190013_c3_seq2	GBRG01091879.1	NA	0.000480538
comp190013_c3_seq3	GBRG01091880.1	NA	0.000534045
comp190013_c3_seq4	GBRG01091881.1	NA	0.000587199
comp190017_c0_seq1	GBRG01091901.1	peptidylprolyl isomerase b (cyclophilin b)	0.0441176
comp190029_c0_seq1	GBRG01091943.1	NA	0.00518135
comp190029_c0_seq2	GBRG01091944.1	cytochrome p450	0.0212766
comp190038_c0_seq1	GBRG01092000.1	coiled-coil domain-containing protein 104	0.000954654
comp190063_c0_seq1	GBRG01092171.1	predicted protein [Nematostella vectensis]	0.00358637
comp190063_c0_seq2	GBRG01092172.1	predicted protein	0.00361882
comp190064_c0_seq1	GBRG01092174.1	atp-binding cassette sub-family b member mitochondrial	0.00112892
comp190064_c2_seq1	GBRG01092179.1	dna-directed rna polymerase ii subunit rpb4	0.00280112
comp190064_c2_seq2	GBRG01092180.1	dna-directed rna polymerase ii subunit rpb4	0.00369686
comp190068_c1_seq1	GBRG01092197.1	methylase involved in ubiquinone menaquinone biosynthesis	0.00192802
comp190068_c1_seq2	GBRG01092198.1	death-associated protein 1	0.00383142
comp190068_c1_seq3	GBRG01092199.1	death-associated protein 1	0.00390244
comp190068_c1_seq4	GBRG01092200.1	death-associated protein 1	0.00409836
comp190068_c1_seq5	GBRG01092201.1	death-associated protein 1	0.00417973
comp190068_c1_seq6	GBRG01092202.1	death-associated protein 1	0.00468933
comp190081_c0_seq1	GBRG01092314.1	au rna binding protein enoyl-coenzyme a hydratase	0.0346577
comp190084_c0_seq1	GBRG01092369.1	chromosome 1 open reading frame 77	0.00555556
comp190084_c0_seq2	GBRG01092370.1	chromosome 1 open reading frame 77	0.00579374
comp190086_c0_seq1	GBRG01092372.1	ceramide synthase 5	0.0029347
comp190093_c0_seq1	GBRG01092396.1	chromosome 6 open reading frame 150	0.00100301
comp190102_c0_seq1	GBRG01092433.1	oxidoreductase htatip2-like	0.00570497
comp190102_c0_seq2	GBRG01092434.1	NA	0.00688468
comp190102_c0_seq4	GBRG01092436.1	NA	0.00193798
comp190111_c0_seq2	GBRG01092513.1	NA	0.003314
comp190111_c0_seq3	GBRG01092514.1	sacs protein	0.00344234
comp190111_c0_seq4	GBRG01092515.1	NA	0.00363306
comp190111_c0_seq5	GBRG01092516.1	NA	0.00364631
comp190111_c0_seq6	GBRG01092517.1	NA	0.00403633
comp190122_c0_seq1	GBRG01092598.1	subfamily member 6	0.00152091
comp190130_c1_seq1	GBRG01092610.1	four and a half lim domains protein 2	0.00587372
comp190130_c1_seq2	GBRG01092611.1	tropomyosin a	0.00661084
comp190142_c1_seq1	GBRG01092737.1	nitrilase member 2	0.0106707
comp190142_c1_seq3	GBRG01092739.1	omega-amidase nit2-like	0.015544
comp190142_c1_seq5	GBRG01092741.1	nitrilase cyanide hydratase and apolipoprotein n-acyltransferase	0.0184697
comp190142_c4_seq1	GBRG01092749.1	u6 snrna-associated sm-like protein	0.00512821
comp190142_c4_seq2	GBRG01092750.1	u6 snrna-associated sm-like protein	0.0060241
comp190142_c5_seq2	GBRG01092757.1	u6 snrna-associated sm-like protein lsm7	0.0183673
comp190142_c5_seq3	GBRG01092758.1	u6 snrna-associated sm-like protein	0.0195652
comp190146_c4_seq1	GBRG01092778.1	v-type proton atpase subunit d	0.00239808
comp190152_c0_seq1	GBRG01092820.1	ap-1 complex subunit mu-1-like	0.00535396
comp190158_c2_seq1	GBRG01092853.1	PREDICTED: uncharacterized protein LOC100208799	0.00771971
comp190158_c2_seq2	GBRG01092854.1	PREDICTED: uncharacterized protein LOC100208799	0.0081864
comp190162_c0_seq1	GBRG01092896.1	proteasome ( macropain) 26s non- 9	0.00191755
comp190163_c0_seq1	GBRG01092897.1	proteasome subunit alpha type-3	0.00969305
comp190168_c2_seq1	GBRG01092939.1	uncharacterized oxidoreductase yrbe-like	0.00236967
comp190168_c2_seq10	GBRG01092948.1	uncharacterized oxidoreductase yrbe-like	0.00430416
comp190168_c2_seq16	GBRG01092954.1	NA	0.00574713
comp190168_c2_seq2	GBRG01092940.1	NA	0.0027248
comp190168_c2_seq3	GBRG01092941.1	uncharacterized oxidoreductase yrbe-like	0.00275229
comp190168_c2_seq30	GBRG01092968.1	uncharacterized oxidoreductase yrbe-like	0.00793651
comp190168_c2_seq4	GBRG01092942.1	uncharacterized oxidoreductase yrbe-like	0.00294985
comp190173_c1_seq1	GBRG01092997.1	NA	0.00393443
comp190173_c1_seq10	GBRG01093006.1	NA	0.0113636
comp190173_c1_seq11	GBRG01093007.1	NA	0.0113636
comp190173_c1_seq13	GBRG01093009.1	NA	0.0116959
comp190173_c1_seq14	GBRG01093010.1	NA	0.0116959
comp190173_c1_seq15	GBRG01093011.1	NA	0.010989
comp190173_c1_seq17	GBRG01093013.1	NA	0.011976
comp190173_c1_seq2	GBRG01092998.1	NA	0.00457666
comp190173_c1_seq4	GBRG01093000.1	NA	0.0055325
comp190173_c1_seq5	GBRG01093001.1	NA	0.0056101
comp190173_c1_seq6	GBRG01093002.1	NA	0.00573888
comp190173_c1_seq7	GBRG01093003.1	NA	0.00705467
comp190179_c0_seq1	GBRG01093067.1	coatomer subunit zeta-1-like isoform 2	0.00882872
comp190179_c0_seq2	GBRG01093068.1	coatomer subunit zeta-1-like isoform 2	0.0104822
comp190180_c2_seq8	GBRG01093082.1	NA	0.0193548
comp190182_c0_seq1	GBRG01093099.1	26s proteasome non-atpase regulatory subunit 3	0.00978699
comp190190_c0_seq1	GBRG01093130.1	a0zn06_nodsp hemagglutinin-related protein	0.00169587
comp190190_c0_seq2	GBRG01093131.1	a0zn06_nodsp hemagglutinin-related protein	0.0017094
comp190194_c0_seq1	GBRG01093186.1	NA	0.0356872
comp190194_c0_seq4	GBRG01093189.1	NA	0.042471
comp190194_c0_seq8	GBRG01093193.1	NA	0.027907
comp190194_c0_seq9	GBRG01093194.1	NA	0.0895522
comp190196_c0_seq1	GBRG01093197.1	myosin heavy chain isoform a	0.246767
comp190198_c0_seq1	GBRG01093205.1	NA	0.00992411
comp190198_c0_seq2	GBRG01093206.1	NA	0.0136519
comp190200_c0_seq1	GBRG01093217.1	NA	0.00220588
comp190204_c0_seq1	GBRG01093248.1	epsin 2	0.00584307
comp190212_c0_seq1	GBRG01093293.1	tubulin-specific chaperone c	0.000558971
comp190216_c1_seq1	GBRG01093311.1	pleckstrin homology domain-containing family b member 2	0.000451264
comp190216_c1_seq4	GBRG01093314.1	pleckstrin homology domain-containing family b member 2	0.000737463
comp190222_c0_seq1	GBRG01093359.1	isochorismatase domain-containing protein 1	0.00878906
comp190222_c0_seq2	GBRG01093360.1	isochorismatase domain-containing protein 1	0.0108565
comp190226_c1_seq1	GBRG01093385.1	NA	0.00233645
comp190226_c1_seq2	GBRG01093386.1	flavin reductase-like	0.00235988
comp190226_c1_seq3	GBRG01093387.1	flavin reductase-like	0.002457
comp190232_c0_seq1	GBRG01093415.1	nadh dehydrogenase	0.00858896
comp190233_c0_seq1	GBRG01093416.1	ribosome biogenesis regulatory protein homolog	0.000837521
comp190242_c0_seq1	GBRG01093450.1	prohibitin	0.0959253
comp190245_c0_seq1	GBRG01093471.1	protein	0.0161094
comp190245_c0_seq2	GBRG01093472.1	protein	0.0181383
comp190248_c0_seq1	GBRG01251488.1	mitochondrial import receptor subunit tom70	0.00588813
comp190248_c0_seq2	GBRG01093494.1	mitochondrial import receptor subunit tom70-like	0.0208333
comp190248_c0_seq3	GBRG01000244.1	mitochondrial import receptor subunit tom70	0.00641026
comp190248_c1_seq1	GBRG01000245.1	mitochondrial import receptor subunit tom70	0.00708383
comp190248_c1_seq2	GBRG01000246.1	mitochondrial import receptor subunit tom70-like	0.0073187
comp190248_c1_seq3	GBRG01000247.1	mitochondrial import receptor subunit tom70	0.0034662
comp190248_c1_seq4	GBRG01000248.1	mitochondrial import receptor subunit tom70	0.00330033
comp190248_c1_seq7	GBRG01093497.1	mitochondrial import receptor subunit tom70	0.0202899
comp190248_c1_seq8	GBRG01000249.1	mitochondrial import receptor subunit tom70-like	0.00446429
comp190250_c0_seq1	GBRG01093499.1	camp-dependent protein kinase type i-alpha regulatory subunit	0.0127226
comp190250_c0_seq2	GBRG01093500.1	protein camp- type alpha (tissue specific extinguisher 1)	0.0128667
comp190250_c0_seq3	GBRG01093501.1	camp-dependent protein kinase type i-alpha regulatory subunit	0.0134626
comp190250_c0_seq4	GBRG01093502.1	camp-dependent protein kinase type i-alpha regulatory subunit	0.013624
comp190268_c0_seq1	GBRG01093573.1	NA	0.0380228
comp190268_c0_seq3	GBRG01093575.1	NA	0.0425532
comp190268_c0_seq4	GBRG01093576.1	cpd photolyase	0.0471698
comp190268_c1_seq1	GBRG01093577.1	deoxyribodipyrimidine photo-lyase-like	0.0298507
comp190271_c0_seq1	GBRG01093584.1	zinc finger protein ubi-d4	0.00163755
comp190271_c0_seq2	GBRG01093585.1	NA	0.00384615
comp190272_c0_seq1	GBRG01093587.1	hla-b associated transcript 1	0.0143586
comp190272_c0_seq2	GBRG01093588.1	hla-b associated transcript 1	0.00455285
comp190277_c0_seq1	GBRG01093623.1	vacuolar fusion protein ccz1 homolog	0.000601685
comp190284_c1_seq1	GBRG01093648.1	serine carboxypeptidase 1	0.0029036
comp190284_c1_seq2	GBRG01093649.1	NA	0.002936
comp190284_c1_seq3	GBRG01093650.1	NA	0.00363372
comp190316_c0_seq1	GBRG01093874.1	complement component 1 q subcomponent-binding mitochondrial-like	0.0208877
comp190322_c0_seq1	GBRG01251484.1	eukaryotic translation initiation factor 3 subunit k	0.00610501
comp190326_c0_seq1	GBRG01093951.1	serine arginine-rich splicing factor 1-like	0.00271444
comp190326_c0_seq2	GBRG01093952.1	serine arginine-rich splicing factor 1-like	0.00274574
comp190326_c0_seq3	GBRG01093953.1	serine arginine-rich splicing factor 1-like	0.00277778
comp190326_c0_seq4	GBRG01093954.1	serine arginine-rich splicing factor 1-like	0.00281057
comp190346_c0_seq1	GBRG01094099.1	activin-like protein	0.0025113
comp190346_c0_seq2	GBRG01094100.1	NA	0.00243605
comp190349_c0_seq1	GBRG01094110.1	NA	0.00236967
comp190351_c0_seq1	GBRG01094119.1	hydrolase	0.00680272
comp1903642_c0_seq1	GBRG01200335.1	NA	2.16667
comp190370_c0_seq1	GBRG01094293.1	leucine zipper transcription factor-like 1	0.00727995
comp190370_c0_seq2	GBRG01094294.1	leucine zipper transcription factor-like protein 1	0.00961538
comp190378_c0_seq1	GBRG01094341.1	NA	0.00196657
comp190378_c0_seq2	GBRG01094342.1	mitochondrial transcription factor a	0.00211416
comp190396_c0_seq1	GBRG01094516.1	zinc finger mynd domain-containing protein 11 isoform 1	0.00103341
comp190396_c0_seq2	GBRG01094517.1	NA	0.00181818
comp190397_c0_seq1	GBRG01094518.1	protein camp- alpha	0.00894393
comp190397_c0_seq2	GBRG01094519.1	protein camp- alpha	0.00903719
comp190397_c0_seq3	GBRG01094520.1	protein camp- alpha	0.00905608
comp190397_c0_seq4	GBRG01094521.1	protein camp- alpha	0.00915171
comp190413_c0_seq1	GBRG01094607.1	NA	0.00424328
comp190413_c0_seq2	GBRG01094608.1	mandelate racemase muconate lactonizing protein	0.00430416
comp190427_c0_seq1	GBRG01094706.1	predicted protein	0.00157109
comp190428_c0_seq1	GBRG01094707.1	pry1p	0.000922509
comp190435_c0_seq1	GBRG01094736.1	sel1 domain protein repeat-containing protein	0.00262009
comp190435_c0_seq2	GBRG01094737.1	sel1 domain protein repeat-containing protein	0.00265018
comp190435_c0_seq3	GBRG01094738.1	predicted protein	0.00275735
comp190442_c1_seq1	GBRG01094782.1	NA	0.000762777
comp190458_c0_seq1	GBRG01094898.1	mitochondrial ribosomal protein l30	0.0035503
comp190463_c0_seq1	GBRG01094941.1	serine (or cysteine) peptidase clade member isoform cra_a	0.0185376
comp190463_c0_seq2	GBRG01094942.1	serine (or cysteine) peptidase clade member isoform cra_a	0.0186335
comp190467_c0_seq1	GBRG01094965.1	protein o-mannosyl-transferase 2	0.000574053
comp190467_c0_seq2	GBRG01094966.1	protein o-mannosyl-transferase 2	0.000574053
comp190485_c0_seq1	GBRG01095075.1	glutamine synthetase 2	0.0790287
comp190485_c0_seq2	GBRG01095076.1	glutamine synthetase 2	0.0809222
comp190485_c0_seq3	GBRG01095077.1	glutamine synthetase 2	0.0942105
comp190485_c0_seq4	GBRG01095078.1	glutamine synthetase 2	0.0969139
comp190487_c0_seq1	GBRG01095080.1	importin subunit alpha-2	0.00203562
comp190490_c0_seq1	GBRG01095099.1	NA	0.00297999
comp190490_c0_seq10	GBRG01095108.1	NA	0.0035035
comp190490_c0_seq12	GBRG01095110.1	NA	0.00362319
comp190490_c0_seq13	GBRG01095111.1	NA	0.00364015
comp190490_c0_seq14	GBRG01095112.1	neurogenic locus notch homolog protein 2-like	0.00376952
comp190490_c0_seq16	GBRG01095114.1	NA	0.00394589
comp190490_c0_seq18	GBRG01095116.1	NA	0.00412007
comp190490_c0_seq2	GBRG01095100.1	NA	0.00306614
comp190490_c0_seq21	GBRG01095119.1	NA	0.00564061
comp190490_c0_seq22	GBRG01095120.1	NA	0.00595745
comp190490_c0_seq23	GBRG01095121.1	NA	0.00688299
comp190490_c0_seq3	GBRG01095101.1	NA	0.00307828
comp190490_c0_seq4	GBRG01095102.1	cub and sushi domain-containing protein 3-like	0.00317029
comp190490_c0_seq6	GBRG01095104.1	NA	0.00329412
comp190490_c0_seq8	GBRG01095106.1	NA	0.00341463
comp190496_c0_seq1	GBRG01000255.1	hypothetical protein BRAFLDRAFT_74509 [Branchiostoma floridae]	0.00129143
comp190496_c0_seq2	GBRG01000256.1	hypothetical protein BRAFLDRAFT_74509	0.00130039
comp190496_c0_seq3	GBRG01000257.1	hypothetical protein BRAFLDRAFT_74509 [Branchiostoma floridae]	0.00140581
comp190510_c0_seq1	GBRG01095214.1	mitochondrial dicarboxylate carrier-like	0.000902935
comp190510_c0_seq2	GBRG01095215.1	mitochondrial dicarboxylate carrier-like	0.000926784
comp190510_c0_seq3	GBRG01095216.1	mitochondrial dicarboxylate carrier-like	0.000643501
comp190510_c0_seq4	GBRG01095217.1	NA	0.000668003
comp190525_c0_seq1	GBRG01251483.1	astacin 3	0.0087184
comp190528_c0_seq10	GBRG01095327.1	NA	0.028
comp190528_c0_seq2	GBRG01095319.1	adp-ribosylation factor-like protein 6-like	0.0244755
comp190528_c0_seq4	GBRG01095321.1	adp-ribosylation factor-like protein 6-like	0.0254545
comp190528_c0_seq5	GBRG01095322.1	NA	0.0254545
comp190528_c0_seq7	GBRG01095324.1	adp-ribosylation factor-like protein 6-like	0.0259259
comp190528_c0_seq9	GBRG01095326.1	NA	0.0269231
comp190540_c0_seq1	GBRG01095366.1	NA	0.00382979
comp190540_c0_seq2	GBRG01095367.1	serine threonine-protein kinase mark1	0.00384944
comp190540_c0_seq3	GBRG01095368.1	serine threonine-protein kinase mark1	0.00389948
comp190540_c0_seq4	GBRG01095369.1	serine threonine-protein kinase mark1	0.00391986
comp190540_c2_seq1	GBRG01095371.1	serine threonine-protein kinase	0.00144509
comp190552_c0_seq15	GBRG01095460.1	NA	0.0142857
comp190555_c0_seq1	GBRG01095467.1	NA	0.0251451
comp190555_c0_seq2	GBRG01095468.1	vesicle-trafficking protein sec22b-like	0.0254652
comp190555_c0_seq3	GBRG01095469.1	vesicle-trafficking protein sec22b-like	0.0254902
comp190561_c1_seq1	GBRG01095513.1	synaptotagmin vii alpha-like	0.000521105
comp190561_c1_seq2	GBRG01095514.1	synaptotagmin vii alpha-like	0.000559284
comp190568_c0_seq1	GBRG01095546.1	NA	0.00317125
comp190568_c0_seq2	GBRG01095547.1	NA	0.0031881
comp190568_c0_seq3	GBRG01095548.1	rwd domain-containing protein	0.00449775
comp190568_c0_seq4	GBRG01095549.1	NA	0.00453172
comp190569_c0_seq1	GBRG01095550.1	high mobility group protein 20a-like	0.00275786
comp190569_c0_seq2	GBRG01095551.1	high mobility group protein 20a-like	0.00320924
comp190584_c0_seq1	GBRG01095645.1	NA	0.00223964
comp190584_c0_seq2	GBRG01095646.1	NA	0.00444006
comp190595_c3_seq1	GBRG01095696.1	3 (2 ) -bisphosphate nucleotidase 1	0.00351083
comp190595_c3_seq2	GBRG01095697.1	3 (2 ) -bisphosphate nucleotidase 1	0.00354191
comp190597_c0_seq1	GBRG01095707.1	cysteine-rich with egf-like domain protein 2-like	0.000850702
comp190597_c0_seq2	GBRG01095708.1	NA	0.000931532
comp190600_c0_seq1	GBRG01095718.1	serpin peptidase clade b member like 1	0.0319803
comp190600_c0_seq2	GBRG01095719.1	proteinase inhibitor i4 serpin	0.0332268
comp190605_c0_seq1	GBRG01251479.1	tpm2_podca ame: full=tropomyosin-2	0.0487515
comp190605_c0_seq2	GBRG01251478.1	NA	0.0498329
comp190605_c0_seq3	GBRG01251477.1	tropomyosin	0.0807882
comp190605_c0_seq4	GBRG01251476.1	NA	0.085999
comp190629_c0_seq1	GBRG01095883.1	adp-ribosylation factor 6	0.00297619
comp190629_c0_seq2	GBRG01095884.1	adp-ribosylation factor 6	0.00450857
comp190635_c2_seq1	GBRG01095894.1	dcn1-like protein 5	0.0019084
comp190635_c2_seq10	GBRG01095903.1	dcn1-like protein 4	0.00462963
comp190635_c3_seq1	GBRG01095904.1	dcn1-like protein 5	0.0019084
comp190635_c3_seq13	GBRG01095916.1	dcn1-like protein 4	0.00462963
comp190635_c3_seq14	GBRG01095917.1	dcn1-like protein 4 isoform 2	0.00462963
comp190643_c0_seq1	GBRG01095972.1	predicted protein	0.00129702
comp190643_c0_seq2	GBRG01095973.1	predicted protein [Nematostella vectensis]	0.0015674
comp190665_c0_seq1	GBRG01096127.1	ubiquitin carboxyl-terminal hydrolase isozyme l3	0.00210084
comp190665_c0_seq2	GBRG01096128.1	ubiquitin carboxyl-terminal hydrolase isozyme l3	0.00215285
comp190668_c0_seq1	GBRG01096142.1	replication factor c subunit 4	0.00075188
comp190668_c0_seq2	GBRG01096143.1	NA	0.000768049
comp190679_c0_seq1	GBRG01000258.1	myosin heavy chain	0.0727668
comp190679_c0_seq2	GBRG01096207.1	myosin heavy chain	0.0910635
comp190687_c0_seq1	GBRG01096262.1	serine threonine-protein kinase pak 7-like	0.00164654
comp190724_c0_seq1	GBRG01096534.1	e3 ubiquitin-protein ligase arih1	0.00245098
comp190724_c0_seq4	GBRG01096537.1	ariadne ubiquitin-conjugating enzyme e2 binding protein homolog 1	0.00194932
comp190724_c0_seq5	GBRG01096538.1	e3 ubiquitin-protein ligase arih1-like	0.00831601
comp190724_c1_seq1	GBRG01096539.1	protein ariadne-	0.00314218
comp190724_c1_seq6	GBRG01096544.1	ariadne ubiquitin-conjugating enzyme e2 binding protein homolog 1	0.00194932
comp190724_c1_seq7	GBRG01096545.1	ariadne ubiquitin-conjugating enzyme e2 binding protein homolog 1	0.00202429
comp190724_c1_seq8	GBRG01096546.1	e3 ubiquitin-protein ligase arih1l-like isoform 1	0.00202429
comp190728_c0_seq1	GBRG01096573.1	eukaryotic translation initiation factor 2 subunit 3	0.0110081
comp190731_c0_seq1	GBRG01096588.1	allene oxide synthase-lipoxygenase	0.000535045
comp190734_c0_seq1	GBRG01096636.1	probable atp-dependent rna helicase ddx56	0.0019333
comp190738_c2_seq1	GBRG01096647.1	NA	0.00227015
comp190738_c2_seq2	GBRG01096648.1	NA	0.00239091
comp190738_c2_seq3	GBRG01096649.1	NA	0.00281294
comp190738_c2_seq4	GBRG01096650.1	NA	0.00300075
comp190741_c2_seq1	GBRG01096673.1	protein	0.00330518
comp190741_c2_seq2	GBRG01096674.1	protein	0.00336072
comp190744_c0_seq1	GBRG01096684.1	calcium uniporter mitochondrial	0.00908403
comp190778_c0_seq1	GBRG01096979.1	interacting protein 1	0.000656599
comp190784_c0_seq1	GBRG01096998.1	cullin 3	0.000248016
comp190784_c0_seq2	GBRG01096999.1	cullin 3	0.000249252
comp190793_c0_seq1	GBRG01000265.1	serine threonine-protein phosphatase pp1-beta catalytic subunit	0.00339506
comp190793_c0_seq4	GBRG01097040.1	serine threonine-protein phosphatase pp1-beta catalytic subunit	0.00681115
comp190796_c0_seq1	GBRG01097052.1	NA	0.00357782
comp190807_c0_seq1	GBRG01097115.1	transmembrane protein 85-like	0.000794913
comp190809_c0_seq1	GBRG01251475.1	eukaryotic translation initiation factor 3 subunit h	0.0154143
comp190821_c0_seq1	GBRG01097244.1	peptidyl-prolyl cis-trans isomerase b-like	0.00555556
comp190825_c0_seq1	GBRG01000268.1	78 kda glucose-regulated protein precursor	0.160107
comp190829_c2_seq1	GBRG01097293.1	follistatin isoform 2	0.00548082
comp190832_c0_seq1	GBRG01097315.1	NA	0.00614439
comp190832_c0_seq2	GBRG01097316.1	NA	0.00160514
comp190832_c1_seq1	GBRG01097319.1	uncoordinated family member (unc-105)- partial	0.00211416
comp190846_c0_seq1	GBRG01251474.1	glutaryl- mitochondrial-like	0.00421585
comp190846_c0_seq2	GBRG01251473.1	glutaryl-coenzyme a dehydrogenase	0.00425894
comp190859_c0_seq1	GBRG01097504.1	peptidase d	0.016674
comp190865_c0_seq1	GBRG01097527.1	vacuolar protein-sorting-associated protein 36	0.00248344
comp190869_c0_seq1	GBRG01097540.1	n-terminal acetyltransferase complex ard1 subunit homolog a	0.00418216
comp190869_c0_seq2	GBRG01097541.1	n-terminal acetyltransferase complex ard1 subunit homolog a	0.0045755
comp190869_c0_seq5	GBRG01097544.1	n-terminal acetyltransferase complex ard1 subunit homolog a	0.00921187
comp190879_c0_seq1	GBRG01097618.1	mannosyl-oligosaccharide glucosidase	0.00352983
comp190881_c0_seq1	GBRG01097635.1	NA	0.00134771
comp190881_c0_seq2	GBRG01097636.1	NA	0.00150602
comp190881_c0_seq3	GBRG01097637.1	NA	0.00314961
comp190886_c0_seq1	GBRG01097652.1	proteasome subunit alpha type-7	0.00570033
[truncated: 8,969 more rows]

## Sheet: S5B)JellyOM unique proteins 
Blast annotation	PSM/AA	Relative abundance (%)
unknown	12.2928	8.91908
fibrillin	10.3513	7.51043
myosin	9.44069	6.84973
ribosomal protein	5.14588	3.73361
protein	4.63961	3.36629
ubiquitin c	4.41807	3.20555
actin-like	4.12884	2.9957
60 kda heat shock mitochondrial	2.96044	2.14796
60s ribosomal protein	2.60324	1.88879
histones-associated	2.40248	1.74313
40s ribosomal protein-like	2.24313	1.62751
beta 2c	2.04051	1.4805
heat shock proteins	1.75802	1.27554
collagen chains	1.30923	0.949919
t-complex proteins	1.23507	0.896109
aldehyde dehydrogenase	1.16146	0.842704
cytoplasmic actin 1	0.972973	0.705944
nadh dehydrogenase	0.917778	0.665898
ras-associated protein	0.831756	0.603484
ubiquitin family protein	0.811321	0.588657
major vault protein	0.80423	0.583512
peroxiredoxin 6	0.800397	0.580731
ubiquitin isoform cra_e	0.79386	0.575988
uncharacterized protein	0.793546	0.57576
proteasome	0.792413	0.574938
mys_podca ame: full=myosin heavy chain	0.781633	0.567116
ubiquitin-like modifier activating enzyme	0.772762	0.56068
cytochromes	0.76767	0.556986
voltage-dependent anion channel 2	0.72215	0.523959
chaperonin containing subunit 5	0.710426	0.515452
latent-transforming growth factor beta-binding protein 2	0.696429	0.505296
mitochondrial proteins	0.648643	0.470625
ubiquitin a-52 residue ribosomal protein fusion product 1	0.630357	0.457358
actn1 partial	0.608347	0.441389
nucleoside diphosphate kinase b	0.606013	0.439695
d chain the structure of f1-atpase inhibited by	0.594001	0.43098
ubiquitin-conjugating enzyme	0.575908	0.417852
ubiquitin ribosomal protein s27a fusion protein	0.543988	0.394693
eukaryotic translation initiation factor	0.543027	0.393996
atp synthase	0.536219	0.389055
synthetic ubiquitin	0.535503	0.388536
ubiquitin-like protein	0.50719	0.367994
26s protease regulatory subunit	0.495371	0.359419
tubulin alpha-1a chain- partial	0.488165	0.35419
s-adenosylhomocysteine hydrolase	0.472286	0.342669
thymosin beta homologue	0.461416	0.334782
poly (adp-ribose) polymerase	0.456034	0.330878
methylmalonate-semialdehyde dehydrogenase	0.436085	0.316403
f-type lectin 2	0.435531	0.316001
superfast myosin heavy chain	0.426579	0.309506
bryohealin precursor	0.415586	0.30153
chaperonin complex component tcp-1 beta subunit	0.413231	0.299821
thimet oligopeptidase	0.413167	0.299775
peptidylprolyl isomerase a	0.405172	0.293974
adp-ribosylation factor	0.396851	0.287937
tubulin beta-2c chain	0.369255	0.267914
peptidyl-prolyl cis-trans isomerase	0.364625	0.264555
guanine nucleotide binding protein	0.36281	0.263238
hydroxysteroid dehydrogenase-like protein 2	0.361668	0.262409
similar to conserved hypothetical protein [Hydra magnipapillata]	0.354915	0.25751
glutamine synthetase 2	0.351075	0.254724
alpha- sarcomeric-like	0.345643	0.250782
small ubiquitin-related modifier 1 precursor	0.345216	0.250473
follistatin-related protein 1 precursor	0.340413	0.246988
alpha-actinin-4 isoform 4	0.339286	0.24617
succinyl- ligase	0.337632	0.24497
glyceraldehyde-3-phosphate dehydrogenase	0.336238	0.243958
alpha- sarcomeric	0.330793	0.240008
atp:adp antiporter	0.325265	0.235997
3-hydroxyacyl- dehydrogenase type-2-like isoform 1	0.298039	0.216243
microtubule-actin crosslinking factors	0.297246	0.215668
poly -specific endoribonuclease-b-like	0.290276	0.210611
pyruvate kinase muscle isozyme	0.287205	0.208383
tropomyosin	0.286028	0.207529
heterogeneous nuclear ribonucleoprotein	0.279917	0.203095
core histone macro- isoform 1	0.272752	0.197896
stress-70 mitochondrial-like	0.269062	0.195219
alpha isoform a	0.257032	0.186491
translocon-associated protein subunit alpha	0.253981	0.184277
filamin-b isoform 4	0.252725	0.183366
sh3 domain-binding glutamic acid-rich-like protein 3-like	0.252435	0.183155
sh3 domain-binding glutamic acid-rich-like protein 3	0.252331	0.183079
Coagulation factor 5/8 C	0.251101	0.182188
rna-binding protein	0.250414	0.181689
transketolase-like protein 2	0.249421	0.180968
col2a1a protein	0.248535	0.180326
alpha- sarcomeric-like isoform 1	0.244835	0.177641
phospholipase a2	0.239636	0.173869
isoforms	0.230657	0.167354
transcription elongation factor	0.230453	0.167206
elongation factor 1 alpha	0.229567	0.166563
gtp-binding nuclear protein ran	0.225568	0.163662
clathrin heavy chain 1	0.223382	0.162076
elongation factor 2-like	0.222226	0.161237
translational activator gcn1	0.219801	0.159478
death-associated protein kinase 3	0.217709	0.15796
achain nmr study of the fibrillin-1 cbegf12-13 pair of ca2+ binding epidermal growth factor-like domains	0.216972	0.157425
fbn3_human ame: full=fibrillin-3 flags: precursor	0.215686	0.156492
cndp dipeptidase 2 (metallopeptidase m20 family)	0.215664	0.156476
lamin b1	0.214351	0.155523
mechanosensory protein 2-like	0.213384	0.154821
ganglioside gm2 activator-like	0.210557	0.152771
far upstream element binding protein 1	0.205567	0.14915
heavy polypeptide non-muscle	0.205336	0.148982
ferritin high chain	0.202264	0.146753
PREDICTED: hypothetical protein [Hydra magnipapillata]	0.201819	0.146431
superoxide dismutase	0.199179	0.144515
btb poz domain-containing protein	0.198667	0.144144
malate dehydrogenase mitochondrial variant 1	0.196536	0.142598
protein disulfide-isomerase a6-like	0.19372	0.140554
minor isoform	0.193396	0.140319
astacin-like	0.192701	0.139815
neurocalcin homolog	0.192336	0.13955
solute carrier family member-like	0.191177	0.138709
ubiquitin	0.18894	0.137086
h2a histone member v	0.186982	0.135666
phosphonoacetaldehyde hydrolase	0.186452	0.135281
prion-like-(q n-rich)-domain-bearing protein family member (pqn-13)	0.181103	0.1314
prohibitin	0.180971	0.131304
transferrin	0.179467	0.130213
gdp dissociation inhibitor 2	0.178982	0.129861
phosphoglycerate kinase	0.178909	0.129808
dihydrolipoamide dehydrogenase	0.176526	0.128079
prefoldin subunit 2	0.174277	0.126447
succinate dehydrogenase	0.172714	0.125313
endoplasmin precursor	0.172698	0.125302
latent-transforming growth factor beta-binding protein 4	0.1725	0.125158
cg15828 cg15828-pb	0.17015	0.123453
26s proteasome non-atpase regulatory subunit	0.168032	0.121916
viral a-type inclusion protein repeat containing protein	0.16722	0.121327
78 kda glucose-regulated protein precursor	0.160107	0.116166
massive surface protein	0.159858	0.115986
ShK domain	0.158835	0.115243
cre-hsp-6 protein	0.158389	0.11492
splicing arginine serine-rich 4	0.157973	0.114618
deoxyribonuclease	0.157281	0.114116
alpha- sarcomeric-like isoform 2	0.156028	0.113207
s-adenosylmethionine synthase isoform type-2	0.155244	0.112638
transmembrane protease serine 6	0.155158	0.112575
von willebrand factor	0.154748	0.112278
transitional endoplasmic reticulum atpase	0.153874	0.111644
sorting nexin	0.153447	0.111334
vacuolar h	0.151254	0.109743
v-type proton atpase subunits	0.149425	0.108416
poly -specific endoribonuclease-like	0.148882	0.108022
na(+) h(+) exchange regulatory cofactor nhe-rf2	0.148706	0.107894
fatty aldehyde dehydrogenase isoform 2	0.146307	0.106153
stress-70 mitochondrial	0.14569	0.105706
serine threonine-protein phosphatase	0.145591	0.105634
importins	0.144411	0.104778
ruvb-like 1	0.143013	0.103763
peroxiredoxin 1	0.140659	0.102056
musashi homolog 2	0.140575	0.101995
small nuclear ribonucleoprotein	0.136245	0.0988532
member ras oncogene family	0.135791	0.0985237
melanotransferrin precursor	0.134558	0.097629
nascent polypeptide-associated complex subunit alpha	0.132856	0.0963942
ankyrin repeat	0.132826	0.0963727
utrophin- partial	0.12973	0.0941263
peroxiredoxin 4	0.129518	0.0939723
translation elongation factor partial	0.128773	0.0934315
dihydrolipoyl mitochondrial-like	0.127789	0.0927175
short chain dehydrogenase reductase family protein	0.12766	0.0926239
mapmodulin-like protein	0.125316	0.0909236
small subunit ribosomal protein 28	0.123684	0.0897395
alpha- partial	0.122671	0.0890042
protein disulfide isomerase	0.121776	0.0883549
surfeit locus protein 4	0.121397	0.0880802
short chain dehydrogenase	0.120482	0.0874161
melanotransferrin	0.119243	0.0865171
thimet oligopeptidase-like	0.119221	0.086501
serine threonine protein kinase	0.118068	0.0856645
calmodulin	0.117892	0.085537
ap-1 complex subunit	0.116489	0.084519
dna-directed dna/rna polymerase	0.115994	0.08416
zinc metalloproteinase nas-like	0.115477	0.0837844
malate cytoplasmic	0.115191	0.0835775
phosphoenolpyruvate cytosolic	0.114321	0.082946
proliferating cell nuclear antigen	0.113916	0.0826521
stomatin-like protein 2-like	0.11299	0.0819803
14-3-3 protein epsilon	0.112272	0.0814594
laminin	0.110298	0.0800272
delta-1-pyrroline-5-carboxylate mitochondrial	0.110035	0.0798362
s9 ribosomal protein	0.109955	0.0797786
map kinase	0.109925	0.0797567
eukaryotic initiation factor 4a-ii	0.109867	0.0797144
3-hydroxyisobutyrate mitochondrial-like	0.108453	0.0786884
predicted protein [Nematostella vectensis]	0.105677	0.0766742
transaldolase	0.103366	0.0749974
hypotherical protein	0.103104	0.0748078
lim and sh3 domain protein 1	0.102182	0.0741383
enolase	0.102115	0.0740898
3-hydroxyisobutyrate dehydrogenase	0.101845	0.0738942
prefoldin subunit 3-like	0.100802	0.0731374
camp-dependent protein kinase	0.100136	0.0726543
protein nhl-1	0.099665	0.0723123
lysosomal aspartic protease	0.0992608	0.072019
adenylate kinase	0.0973772	0.0706524
betaine--homocysteine s-methyltransferase 1	0.0971787	0.0705084
coactosin-like protein	0.0949209	0.0688702
glycyl-trna synthetase	0.0945375	0.068592
gmp reductase 2	0.0940671	0.0682507
secretory carrier membrane protein 2	0.0938575	0.0680987
poly binding cytoplasmic 4 (inducible form)	0.0934809	0.0678254
rrna 2 -o-methyltransferase fibrillarin-like	0.0930935	0.0675443
malate cytoplasmic-like	0.0921212	0.0668389
aconitate mitochondrial-like	0.0916973	0.0665313
adenosine kinase 2	0.090843	0.0659115
protein mec- isoform b	0.0906863	0.0657978
3-ketoacyl- mitochondrial	0.090594	0.0657308
apolipophorin precursor	0.0903226	0.0655339
charged multivesicular body protein 2a	0.0896103	0.0650171
beta-hexosaminidase subunit alpha-like	0.0891119	0.0646555
vesicle associated proteins	0.0890585	0.0646167
poly -binding protein 4 isoform c	0.0889047	0.0645051
vacuolar atp synthase subunit	0.0883046	0.0640697
signal sequence receptor alpha	0.0881459	0.0639546
ribophorin i	0.0880204	0.0638636
fk506-binding protein 2 precursor	0.0877193	0.0636451
peroxiredoxin- mitochondrial-like	0.0868571	0.0630195
aplp_locmi ame: full=apolipophorins contains: ame: full=apolipophorin-2 ame: full=apolipophorin ii ame: full=apolp-2 contains: ame: full=apolipophorin-1 ame: full=apolipophorin i ame: full=apolp-1 flags: precursor	0.0864731	0.0627409
transforming growth factor-beta-induced protein ig-h3	0.0858532	0.0622911
leucyl-trna cytoplasmic	0.0856681	0.0621568
regucalcin	0.0853971	0.0619602
apolipophorins- partial	0.0853293	0.061911
peroxiredoxin- mitochondrial	0.0850112	0.0616802
translocon-associated protein alpha	0.0849195	0.0616136
chaperonin containing subunit 6a (zeta 1)	0.0846075	0.0613873
nad mitochondrial	0.0845291	0.0613304
puromycin-sensitive aminopeptidase	0.0842993	0.0611636
calumenin	0.0837409	0.0607586
electron transfer flavoprotein subunit beta	0.0824838	0.0598464
protein myo-5	0.0821114	0.0595763
hydroxyacyl-coenzyme a dehydrogenase 3-ketoacyl-coenzyme a thiolase enoyl-coenzyme a hydratase (trifunctional protein) alpha subunit	0.0819296	0.0594443
electron transfer flavoprotein subunit mitochondrial precursor	0.0816327	0.0592289
cysteine-rich motor neuron 1	0.0804191	0.0583484
6-phosphogluconate decarboxylating	0.0800356	0.0580701
apoptosis inhibitor 5	0.0796932	0.0578217
citrate synthase	0.0794521	0.0576467
tho complex	0.0787241	0.0571186
dolichyl-diphosphooligosaccharide-protein glycosyltransferase	0.0786517	0.057066
cathepsin l	0.0775862	0.056293
glycine-rich rna-binding protein	0.0767246	0.0556678
pancreatic trypsinogen	0.0760456	0.0551752
calcium-regulated heat stable protein 1	0.07483	0.0542932
glutamate dehydrogenase 1	0.0743913	0.0539749
cell cycle associated protein 1	0.0741251	0.0537817
c-1-tetrahydrofolate cytoplasmic-like	0.0733967	0.0532533
serine arginine-rich splicing factor 1-like	0.0726732	0.0527283
protein disulfide-isomerase a4 precursor	0.0726465	0.052709
arp3 actin-related protein 3 homolog	0.0721763	0.0523678
ethylmalonic encephalopathy 1	0.0720562	0.0522807
prostaglandin d2 hematopoietic-like	0.0719793	0.0522248
dihydrolipoamide dehydrogenase e3 subunit	0.0715232	0.0518939
aspartate mitochondrial	0.0710835	0.0515749
fructose-bisphosphate aldolase a	0.0708955	0.0514385
folate receptor	0.0707745	0.0513507
alcohol dehydrogenase	0.0704449	0.0511116
fucose mutarotase-like	0.0698744	0.0506976
dek oncogene	0.069022	0.0500792
thimet oligopeptidase 1	0.0687679	0.0498948
phosphonopyruvate decarboxylase	0.0687585	0.049888
vitamin b6 biosynthesis protein	0.0685279	0.0497207
glutathione s-transferase mu 3	0.0676056	0.0490515
multiple epidermal growth factor-like domains protein 6- partial	0.067592	0.0490417
rnp-1 like rna-binding protein	0.0673533	0.0488684
phosphoenolpyruvate phosphomutase	0.0672748	0.0488115
tropomyosin invertebrate	0.0671429	0.0487158
von hippel-lindau binding protein 1	0.0668004	0.0484673
tyrosine-protein kinase	0.0663395	0.0481328
vasa-like protein	0.0661207	0.0479742
nadh dehydrogenase flavoprotein 1	0.0656934	0.0476641
transcriptional activator protein pur-alpha-like	0.0653376	0.047406
non-specific lipid-transfer protein	0.0651443	0.0472657
kh domain containing protein	0.0650805	0.0472194
annexin a7-like	0.064792	0.0470101
es1 protein mitochondrial-like isoform 1	0.0645482	0.0468332
sodium potassium-transporting atpase subunit alpha-3	0.0643954	0.0467223
matrix metalloproteinase	0.0643563	0.0466939
calnexin	0.0641379	0.0465355
splicing factor	0.0641248	0.046526
phosphoglycerate kinase 1	0.063975	0.0464173
flotillin isoform b	0.0637823	0.0462775
methylmalonyl- mitochondrial isoform 2	0.0636704	0.0461963
atp-dependent rna helicase	0.0636593	0.0461882
annexin a7	0.0635922	0.0461395
dihydrolipoyllysine-residue acetyltransferase component of pyruvate dehydrogenase mitochondrial	0.0634859	0.0460624
mucin-2- partial	0.0633721	0.0459799
mrna cap guanine-n7 methyltransferase	0.0630627	0.0457554
thioredoxin domain containing protein	0.0626735	0.045473
mitogen-activated protein kinase 1	0.0626431	0.045451
high density lipoprotein binding protein	0.0622143	0.0451398
vacuolar protein sorting-associated protein	0.0619537	0.0449507
kinectin 1	0.0619266	0.0449311
mutant p53 binding protein 1 variant	0.0618443	0.0448714
amine oxidase	0.0616125	0.0447032
predicted protein	0.0614424	0.0445797
calumenin-like isoform 2	0.061145	0.044364
apical endosomal glycoprotein	0.0610764	0.0443142
fumarylacetoacetate hydrolase	0.0605201	0.0439106
eukaryotic translation elongation factor 1 gamma	0.060472	0.0438757
cubilin precursor	0.0602606	0.0437223
carbamoyl-phosphate synthase	0.0589879	0.0427989
selenoprotein	0.0588582	0.0427048
low quality protein: alk tyrosine kinase receptor-like	0.0588235	0.0426796
archain 1	0.0587533	0.0426287
fumarylacetoacetate hydrolase domain-containing protein 2a-like	0.058623	0.0425341
n-acyl-phosphatidylethanolamine-hydrolyzing phospholipase d	0.0583333	0.042324
histidine triad nucleotide-binding protein 1	0.0580848	0.0421436
dnaj homolog subfamily	0.0578866	0.0419998
sepiapterin reductase	0.057795	0.0419334
f-actin-capping protein subunit beta-like	0.0577406	0.0418939
filament-like plant protein 1	0.0576923	0.0418589
gamma-glutamyltransferase isoform cra_a	0.0576566	0.041833
procollagen- -oxoglutarate 5-dioxygenase 1-like	0.0576414	0.0418219
aminopeptidase puromycin sensitive	0.0575351	0.0417448
polyamine oxidase	0.0574228	0.0416633
ubiquitin-activating enzyme e1	0.0572201	0.0415162
tubulin alpha-1b chain	0.0571066	0.0414339
interleukin enhancer binding factor 2	0.0569865	0.0413468
methionine-r-sulfoxide reductase mitochondrial-like	0.0568281	0.0412318
cchc-type zinc finger protein cg3800-like	0.0567686	0.0411886
staphylococcal nuclease domain-containing protein 1	0.0567082	0.0411448
mgc82112 protein	0.0564231	0.040938
rab gdp dissociation inhibitor beta	0.0562852	0.0408379
zn72d cg5215-pb	0.0559956	0.0406278
methylmalonyl- mitochondrial	0.0559827	0.0406184
receptor-type tyrosine-protein phosphatase s-like	0.0557406	0.0404428
neural cell adhesion molecule 2	0.0553629	0.0401688
high mobility group protein homolog tdp-1	0.0552861	0.0401131
pyruvate dehydrogenase	0.0552587	0.0400931
coatomer subunit beta	0.0551733	0.0400312
calcium calmodulin dependent protein kinase	0.0542753	0.0393797
gelsolin-like protein 2-like	0.0539662	0.0391554
rab-protein 2	0.0537029	0.0389643
methylthioadenosine phosphorylase	0.0535477	0.0388517
ii-fbpl precursor	0.0532955	0.0386687
calcyphosin-like protein	0.0530529	0.0384927
translocon-associated protein subunit beta precursor	0.0529996	0.0384541
iii-fbpl precursor	0.0527887	0.038301
cell division cycle 42 (gtp binding 25kda)	0.0525803	0.0381498
cleft lip and palate associated transmembrane protein	0.0524787	0.0380761
major vault	0.0521643	0.037848
dehydrogenase reductase sdr family member 4	0.0520022	0.0377304
aspartyl-trna synthetase	0.0512563	0.0371892
septin 6	0.0510377	0.0370306
stress-induced-phosphoprotein 1	0.0509269	0.0369502
universal stress protein	0.0509078	0.0369363
dynein intermediate chain axonemal	0.0503664	0.0365435
lactotransferrin precursor	0.0502283	0.0364433
PREDICTED: hypothetical protein	0.0501253	0.0363686
upf0361 protein c3orf37 homolog	0.0499097	0.0362122
cathepsin b	0.0498721	0.0361849
fus interacting protein (serine arginine-rich) 1	0.0498139	0.0361426
PREDICTED: similar to predicted protein [Hydra magnipapillata]	0.0497872	0.0361233
isocitrate dehydrogenase	0.0495981	0.0359861
z band alternatively spliced pdz-motif protein isoform j	0.0495882	0.0359789
coiled-coil domain containing protein	0.0495815	0.0359741
prostamide prostaglandin f synthase	0.0495495	0.0359509
tyrosine aminotransferase	0.0494892	0.0359071
protein sco1 mitochondrial-like	0.0489399	0.0355085
xylulose kinase-like	0.0488437	0.0354387
phosphoethanolamine isoform a	0.0488232	0.0354238
tpm2_podca ame: full=tropomyosin-2	0.0487515	0.0353718
single-stranded dna binding protein	0.0487402	0.0353636
malate synthase a	0.0485725	0.035242
fumarylacetoacetate hydrolase domain containing 2a	0.0485097	0.0351964
agrin precursor	0.0482185	0.0349851
Hemicentin-2	0.0477924	0.034676
pregnancy zone protein	0.0477032	0.0346113
golgi-associated plant pathogenesis-related protein 1	0.0475782	0.0345206
alpha-2-macroglobulin precursor	0.0475638	0.0345101
72 kda type iv collagenase-like	0.0472727	0.0342989
cpd photolyase	0.0471698	0.0342242
calreticulin	0.0470219	0.0341169
cathepsin z precursor	0.0469432	0.0340598
double-stranded rna-binding protein staufen-like protein 2	0.0469215	0.0340441
transaldolase 1	0.0467826	0.0339433
pleiotropic regulator 1-like	0.0467448	0.0339159
basic protein of sperm head cytoskeleton isoform cra_a	0.0462739	0.0335742
n -dimethylarginine dimethylaminohydrolase 1-like	0.0456379	0.0331128
prefoldin subunit 3	0.0452486	0.0328303
serine protease	0.0452417	0.0328253
calponin transgelin	0.0450734	0.0327032
acid ceramidase-like	0.0449295	0.0325988
polyamine oxidase-like	0.0447663	0.0324804
sorcin	0.0446625	0.032405
tight junction protein zo-1	0.0445015	0.0322882
gamma-glutamyltranspeptidase 1-like	0.0444817	0.0322739
acetyl- mitochondrial precursor	0.0444572	0.0322561
proteinase inhibitor i4 serpin	0.0443209	0.0321572
peptidylprolyl isomerase b (cyclophilin b)	0.0441176	0.0320097
calcium-binding mitochondrial carrier protein aralar1	0.0439049	0.0318554
piwi-like protein 1-like	0.0438913	0.0318455
kielin chordin-like protein	0.0435957	0.031631
l-3-hydroxyacyl-coenzyme a short chain	0.0435821	0.0316211
syntaxin	0.043419	0.0315028
signal sequence delta	0.0432432	0.0313753
pleiotropic regulator 1	0.0427416	0.0310113
methenyltetrahydrofolate synthetase domain-containing protein	0.0427413	0.0310111
gm2 activator protein	0.0426985	0.0309801
developmentally regulated gtp binding protein 1	0.0425304	0.0308581
dynein light chain type	0.0425287	0.0308569
zinc finger protein-like	0.0423719	0.0307431
atp-binding cassette	0.0422049	0.0306219
low quality protein: heterogeneous nuclear ribonucleoprotein h-like	0.0420859	0.0305355
150 kda oxygen-regulated protein	0.0419397	0.0304295
p23-like protein	0.0418327	0.0303518
elongation factor mitochondrial-like	0.0414908	0.0301038
alpha isoform b	0.0414508	0.0300748
protein fam49b-like isoform 2	0.0410226	0.0297641
antioxidant enzyme	0.0407044	0.0295332
achain importin-beta-fxfg nucleoporin complex	0.0406504	0.0294941
cleft lip and palate transmembrane protein 1	0.0405449	0.0294175
multiple coagulation factor deficiency protein 2 homolog	0.0405093	0.0293916
obg-like atpase 1	0.0402341	0.029192
multiple coagulation factor deficiency 2	0.0401837	0.0291554
3-hydroxybutyrate dehydrogenase type 2	0.0398408	0.0289066
ribophorin ii	0.0397052	0.0288082
ferritin	0.0396772	0.0287879
3-oxoacyl-acyl-carrier-protein reductase	0.039514	0.0286695
egf-like domain-containing protein	0.0394833	0.0286472
aldehyde reductase	0.0393603	0.028558
protein dd3-3-like isoform 2	0.0393537	0.0285532
cre-epi-1 protein	0.0390161	0.0283083
viral a-type inclusion protein	0.0388086	0.0281578
chymotrypsin-like elastase family member 3b-like	0.0385164	0.0279457
golgi apparatus protein 1	0.0383263	0.0278078
plasminogen precursor	0.0383244	0.0278064
o- family 3	0.0382801	0.0277743
hydroxyacyl-coenzyme a dehydrogenase 3-ketoacyl-coenzyme a thiolase enoyl-coenzyme a hydratase (trifunctional protein) beta subunit	0.0382003	0.0277164
golgi phosphoprotein 3	0.0381279	0.0276638
pre-mrna-splicing factor syf1	0.0380086	0.0275773
pirin domain protein	0.0377997	0.0274257
adenylyl cyclase-associated protein 1	0.0377668	0.0274019
atp-dependent clp protease atp-binding subunit clpx- mitochondrial	0.0376116	0.0272892
ubiquitin carboxyl-terminal hydrolase	0.037441	0.0271654
probable atp-dependent rna helicase ddx17	0.0372773	0.0270467
talin 1	0.0372525	0.0270287
serine (or cysteine) peptidase clade member isoform cra_a	0.0371711	0.0269697
kynurenine--oxoglutarate transaminase 1-like isoform 1	0.0371559	0.0269586
zeta-sarcoglycan	0.0371139	0.0269281
sb:cb283 partial	0.037037	0.0268724
kinesin-like proteins	0.0370071	0.0268506
matrix metalloproteinase 9	0.036961	0.0268172
14-3-3 zeta	0.0369478	0.0268076
replication protein a 14 kda subunit	0.0365933	0.0265504
ornithine aminotransferase	0.0365906	0.0265485
tubulin-specific chaperone a	0.0364928	0.0264775
threonyl-trna cytoplasmic	0.0364859	0.0264725
protein disulfide-isomerase a3 precursor	0.0364004	0.0264104
purine nucleoside phosphorylase-like	0.0363396	0.0263663
protein camp- alpha	0.0361889	0.026257
sec61 beta subunit	0.0357895	0.0259672
copper chaperone	0.0357526	0.0259404
pyridoxal-dependent decarboxylase domain-containing protein 1	0.0356625	0.0258751
cysteine and glycine-rich protein 1	0.0356308	0.0258521
glutamate dehydrogenase	0.0356007	0.0258302
chaperonin containing subunit 7	0.0355205	0.025772
protein sec13 homolog	0.0351495	0.0255028
epididymal secretory protein e1 precursor	0.0351453	0.0254998
tf-b protein	0.0351351	0.0254924
coatomer subunit alpha- partial	0.0347152	0.0251878
zebra precursor ebra	0.0346863	0.0251668
au rna binding protein enoyl-coenzyme a hydratase	0.0346577	0.025146
probable aminopeptidase npepl1	0.0344686	0.0250088
riboflavin-binding protein	0.0342052	0.0248177
cytoplasmic protein nck2	0.0341984	0.0248128
glycerol-3-phosphate dehydrogenase 2	0.0338028	0.0245258
acetolactate synthase-like	0.0337948	0.0245199
integrins	0.0337295	0.0244726
cre-msi-1 protein	0.0335535	0.0243449
proliferation-associated protein 2g4	0.0334957	0.024303
surfeit locus protein 4 homolog	0.0331754	0.0240705
ribonuclease oy-like	0.0331338	0.0240404
phosphoribosylaminoimidazole carboxylase	0.0330319	0.0239664
clathrin light chain a	0.0327775	0.0237819
coatomer subunit alpha	0.0327455	0.0237587
ciliary rootlet coiled- rootletin	0.0327247	0.0237435
rootletin isoform 1	0.0326834	0.0237136
ef-hand domain-containing protein d1	0.0326645	0.0236998
hypothetical protein BRAFLDRAFT_100558 [Branchiostoma floridae]	0.0324826	0.0235679
thiopurine s-methyltransferase	0.0320733	0.0232709
complement factor b precursor	0.0320257	0.0232363
serpin peptidase clade b member like 1	0.0319803	0.0232034
pre-mrna splicing factor	0.0319635	0.0231912
erlin-2 isoform 1	0.0319375	0.0231724
matrix metallopeptidase 15 (membrane-inserted)	0.0318496	0.0231086
splicing arginine serine-rich 7	0.0317335	0.0230243
e3 ubiquitin-protein ligase	0.0315003	0.0228552
14-3-3 protein zeta delta	0.0314927	0.0228496
glycine c-acetyltransferase 2-amino-3-ketobutyrate-	0.0313112	0.0227179
capping protein (actin filament) muscle z- alpha 2	0.0312629	0.0226829
periplasmic solute binding protein	0.0310428	0.0225232
glycogen phosphorylase	0.0309907	0.0224854
u6 snrna-associated sm-like protein	0.0307175	0.0222872
methenyltetrahydrofolate synthase domain-containing protein	0.0306311	0.0222245
microsomal glutathione s-transferase 2	0.0305844	0.0221906
glucosidase 2 subunit beta	0.0304204	0.0220716
bifunctional purine biosynthesis protein purh	0.0303483	0.0220193
agap007532-pa isoform 2	0.0302307	0.021934
type alpha partial	0.0301928	0.0219065
3-oxoacid transferase 1	0.0300158	0.0217781
cystathionine beta-synthase-like	0.0300027	0.0217686
hepatitis b virus x-interacting protein homolog	0.029987	0.0217572
deoxyribodipyrimidine photo-lyase-like	0.0298507	0.0216583
ran gtpase-activating protein 1	0.0297956	0.0216183
matrix metalloproteinase-15	0.0297277	0.021569
fumarate mitochondrial	0.0297107	0.0215567
4-hydroxyphenylpyruvate dioxygenase	0.0295148	0.0214145
udp-glucose pyrophosphorylase 2	0.0294933	0.021399
dimethylglycine dehydrogenase	0.0293246	0.0212766
trna methyltransferase 112 homolog	0.0292979	0.0212572
elastase-like serine protease	0.0292208	0.0212012
deoxyribose-phosphate aldolase	0.0292173	0.0211987
armet-like protein precursor	0.029204	0.021189
iojap-like protein	0.0291261	0.0211326
cystathionine gamma-lyase	0.0290803	0.0210993
ethanolamine-phosphate cytidylyltransferase-like	0.0289655	0.021016
phenylalanine hydroxlase	0.028735	0.0208488
cortactin	0.0286301	0.0207727
glucose-6-phosphate 1-dehydrogenase	0.02849	0.020671
fascin	0.0284553	0.0206458
methenyltetrahydrofolate synthetase domain containing	0.0283757	0.0205881
translationally controlled tumor protein	0.028133	0.020412
low quality protein: hemicentin-1	0.0280843	0.0203767
spectrin alpha brain	0.0278491	0.020206
carboxypeptidase	0.0278103	0.0201778
apoptosis-inducing factor mitochondrial	0.0278026	0.0201723
growth factor receptor-bound protein 2	0.0277495	0.0201337
hydroxysteroid dehydrogenase-like protein 2-like	0.0277457	0.020131
acetyl- mitochondrial-like	0.027635	0.0200506
upf0160 protein mitochondrial-like	0.0275938	0.0200208
leucine rich repeat containing 59	0.0275735	0.0200061
u6 snrna-associated sm-like protein lsm4-like	0.0275264	0.0199719
neural cell adhesion molecule 1-like	0.0275081	0.0199586
family c2 unassigned peptidase (c02 family)	0.0274475	0.0199146
cation-dependent mannose-6-phosphate receptor precursor	0.0273742	0.0198615
eh domain-containing protein 3	0.0273647	0.0198546
fumarate hydratase	0.027027	0.0196096
short-chain dehydrogenase reductase sdr	0.0269637	0.0195636
fimbrin plastin	0.0268346	0.01947
n -dimethylarginine dimethylaminohydrolase 1	0.0268332	0.019469
ruvb-like 2-like	0.0268199	0.0194593
band 7 protein	0.0266584	0.0193421
phospholipid-hydroperoxide glutathione peroxidase	0.0266393	0.0193283
caffeoyl- o-methyltransferase	0.0265655	0.0192747
plasma kallikrein	0.0265403	0.0192564
cation-dependent mannose-6-phosphate receptor-like	0.0264292	0.0191758
cleft lip and palate transmembrane protein 1 homolog	0.0262744	0.0190635
rac-gamma serine threonine-protein kinase	0.0261723	0.0189894
cg16916 protein	0.0261512	0.0189741
m48 family protein	0.0261438	0.0189687
agmatinase	0.0260717	0.0189165
s-formylglutathione hydrolase	0.0260452	0.0188972
ornithine mitochondrial	0.0259197	0.0188061
prostaglandin reductase 1-like	0.0258982	0.0187905
sco cytochrome oxidase deficient homolog 1	0.025641	0.0186039
ipo5 protein	0.0256093	0.0185809
5-aminoimidazole-4-carboxamide ribonucleotide formyltransferase imp cyclohydrolase	0.0253849	0.0184181
dipeptidyl-peptidase 7	0.0253722	0.0184089
gamma-interferon-inducible lysosomal thiol reductase-like	0.0253666	0.0184048
angiotensin-converting enzyme-like	0.0252918	0.0183506
iron-sulfur cluster assembly enzyme mitochondrial	0.0252708	0.0183354
acyl-coenzyme a c-4 to c-12 straight chain	0.0252667	0.0183324
nucleolysin tiar isoform 1	0.0252427	0.0183149
cdc42-interacting protein 4-like	0.0252146	0.0182946
sister chromatid cohesion protein dcc1	0.0251799	0.0182693
insulin-degrading enzyme	0.0251509	0.0182483
quinone oxidoreductase	0.0251201	0.0182259
hypoxia up-regulated protein 1	0.0249882	0.0181303
mgc81873 protein	0.0249861	0.0181288
drebrin-like	0.0249608	0.0181104
triosephosphate isomerase 1	0.0248977	0.0180646
rdx protein	0.0248139	0.0180038
adenylosuccinate synthetase	0.0248092	0.0180004
phenylalanyl-trna synthetase beta chain	0.0247529	0.0179596
s-phase kinase-associated protein 1	0.0247459	0.0179545
phosphomannomutase 2	0.0245262	0.0177951
kazal-type serine protease inhibitor domain protein	0.024484	0.0177645
neural cell adhesion molecule partial	0.0244418	0.0177338
clustered mitochondria protein homolog	0.0243999	0.0177034
a chain p38 inhibitor-bound	0.0243902	0.0176964
elav-like protein 3-like isoform 1	0.0243847	0.0176924
amp-dependent synthetase and ligase	0.0243673	0.0176798
phosphoethanolamine isoform c	0.0242215	0.017574
hypotheticial protein	0.0241287	0.0175067
histidyl-trna synthetase	0.0240382	0.017441
tumor protein d52	0.0239374	0.0173679
dysferlin isoform 2	0.023913	0.0173502
cad partial	0.0239094	0.0173475
sh3 domain protein sh3glb	0.0239044	0.0173439
counting factor associated protein d-like	0.0238333	0.0172923
golgin subfamily a member 6-like protein 1-like isoform 1	0.0238184	0.0172816
nadp-dependent aldehyde dehydrogenase	0.0238095	0.0172751
nucleosome assembly protein 1-like 1	0.0237993	0.0172676
receptor expression-enhancing protein 5	0.023701	0.0171964
rna-directed dna polymerase from mobile element jockey-like	0.0236998	0.0171955
protein lin-7 homolog b-like	0.0236318	0.0171462
aldehyde partial	0.0235849	0.0171121
protein dd3-3-like	0.0235829	0.0171106
2-aminoethylphosphonate--pyruvate transaminase	0.0235762	0.0171058
endothelin converting enzyme 1	0.0235014	0.0170515
copper transport protein atox1	0.0234742	0.0170318
dnase domain containing 2	0.0234018	0.0169793
macro domain containing 2	0.0233929	0.0169728
phosphate carrier mitochondrial isoform b precursor	0.0233533	0.0169441
rac-gamma serine threonine-protein kinase-like	0.0233236	0.0169225
gcn1l1 protein	0.0232649	0.0168799
protein isoform a	0.0232558	0.0168733
alcohol dehydrogenase class-3	0.0232384	0.0168607
complement component c3 precursor	0.0232241	0.0168503
bifunctional aminoacyl-trna synthetase	0.0232176	0.0168456
disks large homolog 1 isoform 2	0.0231942	0.0168286
glutamine-oxaloacetic transaminase	0.0228744	0.0165966
retinol dehydratase	0.0228258	0.0165613
propionyl coenzyme a beta polypeptide	0.0227519	0.0165077
axonemal outer arm dynein intermediate chain 1	0.0227273	0.0164899
serine hydroxymethyltransferase 2	0.0225989	0.0163967
uridine 5 -monophosphate synthase	0.0225467	0.0163588
col3a1 protein	0.0225141	0.0163352
dimethylaniline monooxygenase	0.0224875	0.0163159
a disintegrin and metalloproteinase with thrombospondin motifs	0.0224167	0.0162645
dynactin subunit 2	0.0222923	0.0161743
secretory carrier-associated membrane protein 1	0.0222701	0.0161582
lim domain-containing protein 2	0.0220997	0.0160345
n-acetylated-alpha-linked acidic dipeptidase 2	0.0220568	0.0160034
phenylalanine hydroxylase	0.0220424	0.0159929
adp-ribosyl cyclase precursor	0.022037	0.015989
hypothetical protein BRAFLDRAFT_267231 [Branchiostoma floridae]	0.0220126	0.0159713
arylesterase	0.0220104	0.0159697
small glutamine-rich tetratricopeptide repeat-containing protein alpha-like	0.0220014	0.0159632
PREDICTED: similar to predicted protein, partial [Hydra magnipapillata]	0.0219883	0.0159537
karyopherin beta 1	0.0218447	0.0158495
nitrilase member 2	0.0218291	0.0158382
low quality protein: papilin-like	0.0218219	0.0158329
neuroblastoma ras viral oncogene-like protein	0.0218031	0.0158193
glutathione s-transferase	0.021776	0.0157997
epididymal secretory glutathione peroxidase precursor	0.0217177	0.0157573
ran binding protein 3	0.0215311	0.015622
delta-1-pyrroline-5-carboxylate synthase-like	0.0215158	0.0156109
high mobility group protein b2	0.0214256	0.0155455
major antigen-like	0.0214147	0.0155375
catenin alpha-2 isoform 1	0.0211778	0.0153656
sulfoacetaldehyde acetyltransferase	0.0211755	0.0153639
thiomorpholine-carboxylate dehydrogenase	0.0211361	0.0153354
mam domain-containing protein 2-like	0.021097	0.015307
tyrosinase-like protein tyr-3-like	0.0210289	0.0152576
hemicentin 1	0.0209235	0.0151811
complement component 1 q subcomponent-binding mitochondrial-like	0.0208877	0.0151552
advillin	0.0207227	0.0150354
death-associated protein 1	0.0207013	0.0150199
14-3-3 protein beta alpha	0.0206335	0.0149707
mannose-binding lectin associated serine protease-3	0.020585	0.0149356
retinol dehydrogenase 8-like	0.0205438	0.0149056
import inner membrane translocase subunit	0.0204893	0.0148661
tnks protein	0.020318	0.0147418
uncharacterized oxidoreductase yrbe-like	0.0203125	0.0147378
plasma cell-induced resident endoplasmic reticulum	0.0203106	0.0147365
nucleoporin seh1 isoform 2	0.0202683	0.0147058
thrombospondin type 1 repeat-containing protein partial	0.0202122	0.0146651
palmitoyl-protein thioesterase 1 precursor	0.0200554	0.0145512
bifunctional 3 -phosphoadenosine 5 -phosphosulfate synthase 1	0.0200201	0.0145256
c-1-tetrahydrofolate cytoplasmic	0.0200041	0.014514
urocanate hydratase-like	0.0199237	0.0144557
protein epi- isoform b	0.0198413	0.0143959
ran binding protein 3-like	0.0198238	0.0143832
tektin 1	0.0198	0.014366
prohibitins and stomatins of the pid partial	0.0197368	0.0143201
protein mago nashi homolog	0.0197005	0.0142938
isochorismatase domain-containing protein 1	0.0196455	0.0142539
d-3-phosphoglycerate dehydrogenase	0.019544	0.0141802
lysosomal h+-transporting atpase 56 v1 subunit b2	0.0195312	0.014171
protein dd3-3-like isoform 1	0.0195059	0.0141525
glutathione peroxidase 2-like	0.0194863	0.0141383
retinol dehydrogenase 11-like	0.0194332	0.0140998
neuro-oncological ventral antigen 1	0.0193798	0.0140611
beta-ureidopropionase	0.0193673	0.014052
lamin b2	0.0193652	0.0140505
atp h+ mitochondrial f1 gamma polypeptide 1	0.0193237	0.0140204
coatomer subunit zeta-1-like isoform 2	0.0193109	0.0140111
atp-dependent clp protease atp-binding subunit clpx- mitochondrial-like isoform 2	0.0192982	0.0140019
sideroflexin 1	0.0192662	0.0139787
zgc:55605 protein	0.0192529	0.013969
cleft lip and palate transmembrane protein 1-like	0.0191972	0.0139286
lupus la protein	0.019186	0.0139205
loc100135351 protein	0.0191858	0.0139203
arginyl-trna synthetase	0.0191571	0.0138995
immunoglobulin domain protein	0.0191571	0.0138995
argininosuccinate synthase	0.0191415	0.0138882
lmp7-like protein	0.0191147	0.0138687
protein prrc1	0.0190281	0.0138059
ef hand domain protein	0.0190115	0.0137939
endothelin-converting enzyme 1	0.018981	0.0137717
peptidase (mitochondrial processing) beta	0.0189686	0.0137627
hla-b associated transcript 1	0.0189115	0.0137213
malectin-a precursor	0.0188823	0.0137001
macro domain-containing	0.0188817	0.0136997
ricin b lectin	0.0188811	0.0136993
hemh_xenla ame: full= mitochondrial ame: full=heme synthase ame: full=protoheme ferro-lyase flags: precursor	0.0187647	0.0136148
lim domain containing protein	0.0187622	0.013613
Antistasin	0.018759	0.0136107
pleckstrin homology domain-containing family f member 2	0.0187354	0.0135935
lysyl-trna synthetase isoform 1	0.0187266	0.0135871
protein epi- isoform c	0.0187144	0.0135783
soul heme-binding protein	0.0186663	0.0135434
aldehyde mitochondrial-like isoform 1	0.0186383	0.0135231
adaptor-related protein complex alpha 2 subunit	0.0186335	0.0135196
methylmalonyl- mitochondrial-like	0.0186089	0.0135018
beta 1	0.0185759	0.0134778
lamin dm0-like	0.0185164	0.0134346
protein igcm-2	0.0184831	0.0134105
nitrilase cyanide hydratase and apolipoprotein n-acyltransferase	0.0184697	0.0134007
calcium-binding mitochondrial carrier protein aralar2-like	0.0184211	0.0133655
s9c (acylaminoacyl-peptidase) family protein	0.0183908	0.0133435
u6 snrna-associated sm-like protein lsm7	0.0183673	0.0133265
isovaleryl coenzyme a dehydrogenase	0.0182697	0.0132556
succinate-semialdehyde mitochondrial	0.0182648	0.0132521
terminal flower 1a	0.0181761	0.0131877
insulin-like growth factor 2 mrna-binding protein 2-like isoform 1	0.0181551	0.0131725
tnf receptor-associated protein 1	0.0180723	0.0131124
rna binding	0.0180291	0.0130811
n-terminal acetyltransferase complex ard1 subunit homolog a	0.0179695	0.0130379
prolyl endopeptidase	0.0179466	0.0130212
calsequestrin 2 (cardiac muscle)	0.017838	0.0129425
synaptosomal-associated protein 25	0.0177903	0.0129078
protein transport protein sec31b	0.0177305	0.0128644
hemicentin-1	0.0177	0.0128423
hypoxia up-regulated isoform cra_a	0.0176991	0.0128417
aael008062- partial	0.0176254	0.0127882
aspartyl aminopeptidase	0.0175787	0.0127543
cytosol aminopeptidase	0.0175541	0.0127365
phospholipase d3-like	0.0175439	0.012729
sumo-conjugating enzyme ubc9-b	0.0174679	0.0126739
aspartate-beta-hydroxylase	0.0174381	0.0126523
microtubule-associated protein rp eb family member 1	0.0174023	0.0126263
carboxylase:pyruvate acetyl-coa propionyl-coa	0.0173465	0.0125858
nucleolar protein 56-like	0.0173137	0.0125621
apoptosis inhibitor 5-like	0.0172911	0.0125456
glyoxylate reductase hydroxypyruvate reductase	0.0172315	0.0125024
pancreatic lipase-related protein 2	0.0172209	0.0124947
legumain	0.0172138	0.0124895
pyruvate mitochondrial-like isoform 2	0.0171893	0.0124718
testis-expressed sequence 264	0.0171482	0.0124419
novel protein vertebrate imp (inosine monophosphate) dehydrogenase 1	0.0171455	0.01244
ricin-type beta-trefoil lectin domain protein	0.0170778	0.0123909
wd repeat-containing protein-like	0.0170334	0.0123586
cleavage stimulation factor subunit 3	0.0169811	0.0123207
atp-citrate synthase isoform 2	0.0169682	0.0123113
zgc:101710 protein	0.0169574	0.0123035
15-hydroxyprostaglandin dehydrogenase	0.0169422	0.0122925
cleavage stimulation factor subunit 3-like	0.0168856	0.0122514
udp-glucose 4-epimerase	0.0168359	0.0122153
phosphoserine aminotransferase 1	0.0167364	0.0121432
3-hydroxyisobutyryl- mitochondrial	0.0167242	0.0121343
pre-mrna-splicing factor atp-dependent rna helicase dhx15-like	0.0167037	0.0121195
peptidase d	0.016674	0.0120979
cugbp elav-like family member 4-like	0.0166667	0.0120926
eukaryotic peptide chain release factor subunit 1	0.0166374	0.0120714
low quality protein: melanotransferrin	0.0164863	0.0119617
protein xrp2	0.0164594	0.0119422
ubiquilin 1	0.0164261	0.011918
ruvb-like 2	0.0164009	0.0118997
aflatoxin b1 aldehyde reductase member 2	0.0163513	0.0118637
hemicentin- partial	0.0162295	0.0117753
suppressor of stomatin mutant uncoordination family member (ssu-2)-like	0.0162008	0.0117546
riken cdna 4933439f18 gene	0.0161937	0.0117494
conserved oligomeric golgi complex subunit 4-like	0.0161819	0.0117408
probable atp-dependent rna helicase ddx43-like	0.0160769	0.0116646
short-chain specific acyl- mitochondrial	0.0160388	0.011637
thrombospondin type 1 domain-containing protein	0.0160171	0.0116213
signal recognition particle 54 kda protein	0.0159591	0.0115792
non-erythrocytic 1	0.0159232	0.0115532
lysosomal alpha-mannosidase-like	0.0159142	0.0115466
glutaminyl-trna synthetase	0.0158976	0.0115346
suppressor of variegation 3-3-like	0.015891	0.0115298
transcobalamin i (vitamin b12 binding r binder family)	0.0158537	0.0115027
splicing proline- and glutamine-rich	0.0158502	0.0115002
fk506-binding protein 15	0.0158345	0.0114888
cullin	0.0158258	0.0114825
elav (embryonic abnormal drosophila)-like 2 (hu antigen b)	0.0156966	0.0113888
sodium calcium exchanger 1	0.0156859	0.0113809
methylcrotonoyl- carboxylase subunit mitochondrial	0.0156846	0.01138
inosine-5 -monophosphate dehydrogenase 2	0.015678	0.0113752
u6 snrna-associated sm-like protein lsm3	0.0156252	0.0113369
ring domain	0.0155807	0.0113047
tetratricopeptide repeat family protein	0.0155798	0.011304
septin 7	0.0155763	0.0113015
septin-7 isoform 1	0.0155763	0.0113015
omega-amidase nit2-like	0.015544	0.011278
glucosamine--fructose-6-phosphate aminotransferase	0.0155346	0.0112712
lysophosphatidic acid phosphatase type 6	0.0154072	0.0111787
gtpase kras-like	0.0153846	0.0111624
selenium binding protein 1	0.0152801	0.0110866
histidine ammonia-lyase	0.0151789	0.0110131
ubiquitin specific protease 41	0.0151515	0.0109932
synaptophysin	0.0150995	0.0109555
alpha- isoform b	0.0150538	0.0109223
phospholipid scramblase 2-like	0.0150082	0.0108893
light tctex-type 1	0.0149889	0.0108753
short isoform ab	0.0149813	0.0108697
hsp90 co-chaperone cdc37	0.014968	0.0108601
alpha 8	0.0149254	0.0108292
bifunctional protein	0.0149254	0.0108292
achain crystal structure of ketosteroid isomerase ( ) from mesorhizobium loti at a resolution	0.0149106	0.0108184
cleavage stimulation factor subunit 1-like	0.0148989	0.0108099
nuclear autoantigenic sperm protein (histone-binding)	0.0148699	0.0107889
unnamed protein product	0.0148515	0.0107756
unnamed protein product [Blastocystis hominis]	0.0148515	0.0107756
sco-spondin- partial	0.0148492	0.0107739
heme oxygenase 2	0.0147435	0.0106972
parkin co-regulated gene protein	0.0147426	0.0106966
kynurenine oxoglutarate transaminase	0.014652	0.0106308
sarcosine mitochondrial	0.0146115	0.0106014
transcription factor btf3 homolog 4	0.0145808	0.0105792
gtp-binding protein sar1b-like	0.0145504	0.0105571
nucleobindin 1	0.0145484	0.0105557
aminoacyl trna synthase complex-interacting multifunctional protein 1-like	0.0144928	0.0105153
phosphoglucose isomerase	0.0144928	0.0105153
rna recognition motif-containing protein rrm	0.0144509	0.0104849
mu-crystallin homolog	0.0143954	0.0104446
tom1-like protein 2	0.0143737	0.0104289
la-related protein 6-like	0.0143402	0.0104046
catenin delta-2-like	0.0143186	0.0103889
leucyl aminopeptidase	0.0142857	0.0103651
methylenetetrahydrofolate dehydrogenase	0.0142726	0.0103555
microtubule-associated protein 1b	0.01427	0.0103536
methyltransferase	0.0142476	0.0103374
translational activator gcn1- partial	0.014245	0.0103355
maguk p55 subfamily member 6	0.0141997	0.0103027
transmembrane protein	0.0141601	0.0102739
acyl-coenzyme a very long chain	0.0141275	0.0102503
cytoplasmic fmr1-interacting protein 2	0.0140561	0.0101985
achain the structure of recombinant plasminogen kringle 1 and the fibrin binding site	0.0140449	0.0101904
coatomer subunit alpha-like	0.0140351	0.0101832
suppressor of tumorigenicity protein partial	0.0140237	0.010175
gcn1 general control of amino-acid synthesis 1-like 1	0.0140056	0.0101618
acetyl-coenzyme a synthetase 2- mitochondrial-like	0.0139777	0.0101416
c-src tyrosine kinase	0.0139485	0.0101204
plant synaptotagmin	0.0139373	0.0101122
hydroxyacylglutathione mitochondrial-like	0.0139017	0.0100864
atpase aaa domain containing 3a	0.0138756	0.0100675
glycine n-methyltransferase	0.0138581	0.0100548
utp--glucose-1-phosphate uridylyltransferase-like	0.0138357	0.0100385
sh3-domain grb2-like endophilin b1	0.0138249	0.0100307
alanyl-trna synthetase	0.0137952	0.0100092
gamma-glutamyl hydrolase	0.0137741	0.00999385
loc495958 protein	0.01375	0.00997636
conserved hypothetical protein	0.0136778	0.00992399
pyridoxine-5 -phosphate oxidase-like	0.0136618	0.00991239
dehydrogenase reductase sdr family member 12	0.0136546	0.00990716
thyroglobulin precursor	0.0136428	0.00989861
copa partial	0.0136245	0.0098853
mam domain-containing glycosylphosphatidylinositol anchor protein 1 partial	0.0136054	0.00987148
gmp synthase	0.0135747	0.00984915
low quality protein: microtubule-actin cross-linking factor 1-like	0.0135736	0.00984838
retinal rod rhodopsin-sensitive cgmp 3 -cyclic phosphodiesterase subunit delta	0.0134514	0.00975971
28 kda heat- and acid-stable phosphoprotein	0.0133694	0.00970024
fucl1_angja ame: full=fucolectin-1 flags: precursor	0.0133333	0.00967405
spectrin alpha chain-like	0.0133333	0.00967405
gamma-adducin isoform b	0.0133229	0.00966647
branched-chain-amino-acid aminotransferase- partial	0.0132275	0.00959727
dual adapter for phosphotyrosine and 3-phosphotyrosine and 3-phosphoinositide-like	0.0132211	0.00959263
rna polymerase ii subunit a c-terminal domain phosphatase ssu72	0.0132017	0.00957857
af483064_1egf repeat-containing protein	0.0131894	0.00956965
peptidase m20 domain-containing protein 2-like	0.0131235	0.00952178
family protein	0.0130605	0.00947608
enoyl- hydratase isomerase family protein	0.0130101	0.00943949
bactericidal permeability-increasing protein	0.0129664	0.00940779
cd63 antigen-like	0.0129572	0.00940113
transforming acidic coiled-coil-containing protein 1	0.0129457	0.00939282
adenine phosphoribosyltransferase	0.0129207	0.00937464
hypothetical protein NEMVEDRAFT_v1g225518	0.0128866	0.00934992
general vesicular transport factor p115-like	0.0128832	0.00934746
enoyl- mitochondrial precursor	0.0128824	0.00934691
lysosomal protein ncu-g1-a-like	0.0128788	0.00934425
protein camp- type alpha (tissue specific extinguisher 1)	0.0128667	0.00933548
prefoldin subunit 6	0.0128205	0.00930197
fibulin-1 precursor	0.0128068	0.00929204
glycine dehydrogenase	0.0127496	0.0092505
caspase 3c	0.0126582	0.00918422
electron-transferring-flavoprotein dehydrogenase	0.0126525	0.00918007
formiminotransferase cyclodeaminase	0.0126445	0.00917423
protein arginine n-methyltransferase 1	0.0126002	0.00914214
ubiquinone biosynthesis protein mitochondrial-like	0.0125911	0.00913553
mrna export factor	0.0125808	0.00912805
ubiquitin-fold modifier 1	0.0125786	0.00912646
b-cell receptor-associated protein 31	0.0125687	0.00911929
ef-hand domain-containing protein d2	0.0125668	0.0091179
inorganic pyrophosphatase-like	0.0125461	0.00910289
golgi apparatus protein 1-like	0.0125	0.00906942
sorbitol dehydrogenase-like	0.0124844	0.00905807
plasma membrane calcium-transporting atpase 3-like	0.0124786	0.00905389
wd-40 repeat protein	0.0124626	0.00904229
sperm surface protein sp17-like	0.0124548	0.0090366
ctxa_caral ame: full=toxin -a short=toxin a ame: full=cat-1 flags: precursor	0.0124448	0.00902937
dystonin isoform 1	0.0124417	0.00902711
glutathione peroxidase	0.0124215	0.00901246
jumonji domain containing 5-like	0.0124207	0.00901188
apical endosomal glyco	0.0124127	0.0090061
serine racemase	0.0124088	0.00900322
dj-1 protein	0.0123457	0.00895745
expressed protein	0.0123267	0.00894365
crk-like protein	0.0123023	0.00892597
arp1 actin-related protein 1 homolog centractin alpha	0.0122986	0.00892328
peroxidasin homolog	0.0122967	0.0089219
acyl- oxidase	0.0122652	0.00889909
o-sialoglycoprotein endopeptidase	0.0122584	0.00889412
afg3-like protein partial	0.0122494	0.00888763
phosphotriesterase-related protein	0.0122366	0.00887829
rhamnospondin 1	0.0122165	0.00886375
cob yrinic acid -diamide mitochondrial-like	0.0121944	0.00884771
glutamine-fructose-6-phosphate transaminase 2	0.0121866	0.00884205
pmp1 protein	0.0121689	0.00882922
dystonin	0.0121603	0.00882295
nfu1 iron-sulfur cluster scaffold mitochondrial-like	0.0121457	0.00881239
adp-dependent glucokinase-like	0.0121086	0.00878547
upf0364 protein c6orf211 homolog	0.012075	0.00876104
glutathione reductase	0.0120296	0.00872813
ribonuclease uk114	0.0120048	0.00871013
tom1-like protein 2-like	0.0119674	0.00868303
surfactant b	0.0119502	0.00867051
serine-threonine kinase receptor-associated protein	0.011925	0.00865226
oxoglutarate (alpha-ketoglutarate) dehydrogenase	0.0119078	0.00863973
mannose-1-phosphate guanyltransferase beta	0.0118959	0.00863112
branched-chain-amino-acid cytosolic	0.0118203	0.00857629
procollagen- -oxoglutarate 5-dioxygenase 2	0.0117994	0.00856111
l-xylulose reductase	0.0117687	0.00853885
translational activator	0.0117647	0.00853593
ribonucleoside-diphosphate reductase large subunit	0.0117608	0.00853306
prefoldin subunit 5	0.0117188	0.00850258
atua gene product	0.011717	0.00850131
vitelline membrane outer layer protein 1 homolog	0.0117155	0.00850021
thiamine pyrophosphate c-terminal tpp-binding	0.0117096	0.00849595
ribulose-phosphate 3-epimerase	0.0117073	0.00849429
atpase inhibitor mai- mitochondrial-like	0.0116788	0.00847362
myelin expression factor 2	0.0116279	0.00843667
serine mitochondrial-like	0.011622	0.00843241
nucleobindin isoform cra_a	0.0115761	0.00839907
myelin expression factor 2 isoform 1	0.0115434	0.00837535
protein nap homolog 1 isoform 1	0.0114596	0.00831455
transcription initiation factor tfiid subunit 6-like	0.0114068	0.00827628
ubiquinone menaquinone biosynthesis methyltransferase	0.0113838	0.00825956
chromosome 1 open reading frame 77	0.0113493	0.00823453
nop58 protein	0.0113136	0.00820865
protein tyrosine non-receptor type 2	0.0113037	0.00820144
phenylalanyl-trna synthetase alpha chain	0.0112644	0.00817292
charged multivesicular body protein 4b	0.0112626	0.00817162
cubilin-like	0.011258	0.00816831
u6 snrna-associated sm-like protein lsm6	0.0112472	0.00816042
homogentisate -dioxygenase	0.0111593	0.00809669
sept7a protein	0.0111483	0.00808867
interphotoreceptor matrix proteoglycan 2	0.0111288	0.00807452
dihydrolipoamide branched chain transacylase e2	0.011062	0.00802606
kazal-type serine proteinase inhibitor 3	0.0110345	0.00800611
transforming acidic coiled-coil-containing protein 3	0.0110057	0.00798523
adipocyte plasma membrane-associated	0.0109986	0.00798007
creatinase	0.0109814	0.00796756
beta-catenin	0.0109112	0.00791665
fk506-binding protein	0.0108865	0.00789877
transmembrane emp24 domain-containing protein 2-like	0.0108696	0.00788645
protein containing duf1446	0.0108559	0.00787657
cug-bp- and etr-3-like factor 3	0.0108359	0.00786204
PREDICTED: hypothetical protein LOC100635635	0.0108247	0.00785393
phospholipase membrane-associated-like	0.0108077	0.00784158
probable 4-hydroxy-2-oxoglutarate mitochondrial precursor	0.0107849	0.00782503
endothelin-converting enzyme 1-like	0.0107704	0.00781452
protein disulfide-isomerase a5	0.0107447	0.00779587
proclotting enzyme-like	0.0107284	0.00778403
matrix metalloproteinase-24-like	0.0107172	0.00777593
pre-mrna-processing-splicing factor 8	0.0106807	0.00774943
upf0577 protein kiaa1324-like	0.0106242	0.00770841
116 kda u5 small nuclear ribonucleoprotein component	0.0105896	0.00768333
valyl-trna synthetase	0.0105453	0.00765116
polymerase delta-interacting protein 2	0.0105434	0.00764983
carbamoyl-phosphate synthetase aspartate and dihydroorotase	0.0104895	0.0076107
nedd8 precursor	0.0104322	0.00756911
novel protein	0.0104295	0.00756718
argininosuccinate lyase	0.0104012	0.00754662
cytoplasmic aconitate hydratase	0.0103623	0.00751843
exosome complex component	0.0103559	0.00751374
aldehyde oxidase	0.0103512	0.00751035
dihydropyrimidine dehydrogenase	0.0103476	0.00750772
golgi reassembly stacking protein 2	0.0103359	0.00749926
zinc - partial	0.0103017	0.00747443
protein arginine n-methyltransferase 5	0.0102858	0.00746288
mam domain-containing glycosylphosphatidylinositol anchor protein 1	0.0102828	0.00746071
elongation of very long chain fatty acids protein 4-like	0.0102721	0.00745293
probable methylthioribulose-1-phosphate dehydratase-like	0.0102554	0.00744082
phosphoacetylglucosamine mutase	0.0102489	0.00743613
udp-n-acetylhexosamine pyrophosphorylase	0.0102291	0.00742179
hypothetical transmembrane protein	0.010197	0.00739846
similar to predicted protein [Hydra magnipapillata]	0.0101911	0.00739418
ubiquitin-like-conjugating enzyme atg3	0.0101873	0.00739147
glutathione synthetase	0.010168	0.00737743
dihydropyrimidinase	0.010157	0.00736943
small 1	0.0101394	0.00735669
mps one binder kinase activator-like 3	0.0101215	0.00734369
structural maintenance of chromosomes protein 1a	0.0101048	0.0073316
protoporphyrinogen oxidase	0.0100886	0.00731985
retinoblastoma-binding protein 4	0.0100849	0.00731716
alkaline phosphatase	0.0100623	0.00730073
ectonucleotide pyrophosphatase phosphodiesterase 3	0.0100559	0.00729607
nuclear pore complex protein	0.0100407	0.00728506
septin 9b	0.0100358	0.00728154
chaperone protein	0.010034	0.00728021
c-myc binding protein	0.0100133	0.00726518
expressed protein [Trichoplax adhaerens]	0.0100106	0.0072632
glutaredoxin 3	0.01001	0.0072628
cysteine-rich motor neuron 1 protein	0.0100063	0.00726007
protein containing bacterial	0.0099889	0.00724748
cytidylate kinase	0.00998004	0.00724106
aldo keto reductase	0.00997837	0.00723984
exportin-2	0.0099723	0.00723544
nuclear transcription factor y subunit alpha	0.00996441	0.00722972
dystroglycan precursor	0.00991553	0.00719425
pao retrotransposon peptidase family protein	0.00991369	0.00719292
adenosylhomocysteinase 3-like	0.00991368	0.00719291
enoyl coenzyme a hydratase peroxisomal	0.00988042	0.00716877
4-coumarate-- ligase-like	0.00987883	0.00716762
n-myc downstream regulated	0.00986651	0.00715868
methylcrotonoyl- carboxylase beta mitochondrial	0.00986436	0.00715713
mannose-binding endoplasmic reticulum-golgi intermediate compartment lectin	0.00985222	0.00714831
alpha-2-macroglobulin receptor-associated	0.00984315	0.00714173
peroxisomal -trans-enoyl- isomerase	0.00984056	0.00713985
prolyl oligopeptidase	0.00983437	0.00713536
sp1 protein	0.00983359	0.00713479
gtpase nras	0.00982801	0.00713075
independent phosphoglycerate mutase isoform 2	0.00980392	0.00711327
t-cell receptor alpha chain	0.00980392	0.00711327
afg3-like protein 2	0.00978938	0.00710272
disintegrin and metalloproteinase domain-containing protein 10	0.00977178	0.00708995
protein phosphatase 1 regulatory subunit 14c-like	0.00975544	0.0070781
gamma-soluble nsf attachment protein	0.00966851	0.00701502
predicted protein [Phaeodactylum tricornutum CCAP 1055/1]	0.00963082	0.00698768
dihydrolipoyllysine-residue succinyltransferase component of 2-oxoglutarate dehydrogenase mitochondrial	0.00962627	0.00698438
leucine zipper transcription factor-like protein 1	0.00961538	0.00697648
natriuretic peptide receptor 1-like	0.00960895	0.00697181
atp-dependent clp protease proteolytic mitochondrial-like	0.00958036	0.00695106
acid phosphatase lysophosphatidic	0.00956938	0.0069431
annexin a7 isoform 2	0.00956938	0.0069431
thioredoxin reductase 3	0.00956522	0.00694008
mgc171407 protein	0.0095511	0.00692984
la-related protein 1b-like	0.00953137	0.00691552
profilin	0.00949367	0.00688817
pao retrotransposon peptidase superfamily	0.00949111	0.00688631
transmembrane emp24 domain-containing protein 10 precursor	0.00949094	0.00688619
pentatricopeptide repeat-containing protein	0.00948167	0.00687946
retinol dehydrogenase 13-like	0.00948012	0.00687834
n-acylethanolamine amidohydrolase	0.0094436	0.00685184
probable protein kinase-like protein 071 homolog	0.00942237	0.00683643
enhancer of mrna-decapping protein 4	0.00942097	0.00683542
propionyl-coenzyme a alpha polypeptide	0.00939335	0.00681538
gtpase nras precursor	0.00938967	0.00681271
rna binding motif protein 33	0.00936447	0.00679442
supervillin- partial	0.00935918	0.00679059
fructose- -	0.00935551	0.00678792
transmembrane emp24 domain-containing protein 4 precursor	0.009355	0.00678755
basic leucine zipper and w2 domain-containing protein 2	0.00931507	0.00675858
sept2 protein	0.00931334	0.00675733
brefeldin a-inhibited guanine nucleotide-exchange protein 1-like	0.00929254	0.00674223
5 ecto-like	0.00929175	0.00674166
u2 small nuclear rna auxiliary factor 1	0.00928074	0.00673368
coagulation factor vii	0.00927487	0.00672942
niemann-pick c1	0.00927247	0.00672767
dcn1-like protein 4	0.00925926	0.00671809
6-phosphofructo-2-kinase fructose- -biphosphatase 3	0.0092542	0.00671442
cg7872 cg7872-pa	0.00920245	0.00667687
catalase	0.00917742	0.00665871
alpha-aminoadipic semialdehyde mitochondrial-like	0.00914849	0.00663772
glycerol-3-phosphate mitochondrial-like	0.00914634	0.00663616
sideroflexin 2	0.00914634	0.00663616
adaptin ear-binding coat-associated protein 1	0.00913242	0.00662606
thrombin inhibitor	0.00912987	0.00662421
chloride intracellular channel 2	0.00910937	0.00660934
dihydrofolate reductase	0.00910403	0.00660546
probable 4-hydroxy-2-oxoglutarate mitochondrial-like	0.0090955	0.00659928
cleavage and polyadenylation specificity factor subunit 6	0.00908743	0.00659342
calcium uniporter mitochondrial	0.00908403	0.00659095
mitogen-activated protein kinase 15	0.00908373	0.00659073
domain-containing protein 4	0.00899277	0.00652474
acyl carrier mitochondrial precursor	0.00897436	0.00651138
stromal membrane-associated protein 1	0.00893855	0.0064854
fibulin 1	0.00891182	0.006466
isoleucyl-trna cytoplasmic	0.00890132	0.00645839
pleckstrin homology domain-containing family a member 8-like	0.00889878	0.00645654
cystathionine beta-synthase	0.0088845	0.00644618
septin-9 isoform e	0.00887762	0.00644119
related ras viral (r-ras) oncogene homolog 2	0.00883978	0.00641373
clathrin interactor 1	0.00881838	0.00639821
low-density lipoprotein receptor-related protein 2-like	0.00881671	0.00639699
alpha-parvin	0.0088035	0.00638741
protein transport protein sec24c	0.00879069	0.00637812
protein canopy 4-like	0.00876601	0.00636021
yth domain family protein 2	0.00871348	0.0063221
rhamnose-binding lectin-like	0.00871008	0.00631963
low quality protein: agrin	0.00870712	0.00631749
interferon gamma-inducible protein 30	0.00860832	0.0062458
flagellar adenylate kinase	0.00859359	0.00623511
betaine--homocysteine s-methyltransferase 1-like	0.00859092	0.00623318
ef-hand protein nucb1	0.00858369	0.00622793
mitogen-activated protein kinase kinase 1-interacting protein 1	0.00857318	0.0062203
lipophorin receptor isoform j	0.00856225	0.00621238
nicastrin precursor	0.00854366	0.00619888
dsba oxidoreductase	0.00853809	0.00619484
phospholipid scramblase 1	0.00852878	0.00618809
cytoplasmic dynein 1 heavy chain 1	0.00851006	0.00617451
beta-sarcoglycan	0.00850461	0.00617055
glutamine-dependent nad(+) synthetase	0.00849219	0.00616154
sodium channel and clathrin linker 1	0.00848878	0.00615907
dipeptidyl peptidase 3	0.00844391	0.00612651
glutamyl aminopeptidase	0.00842728	0.00611444
epidermal retinol dehydrogenase 2-like	0.00838613	0.00608459
glyoxalase domain containing 4	0.00838457	0.00608346
phosphatidylinositol-binding clathrin assembly protein isoform 2	0.00836653	0.00607037
short isoform j	0.00835381	0.00606114
50s ribosomal protein l1	0.00834619	0.00605561
signal recognition particle 9 kda protein	0.00834126	0.00605203
carnitine palmitoyltransferase 1a liver	0.00832968	0.00604363
mps one binder kinase activator-like 2b	0.00823354	0.00597387
tubby homolog	0.00822555	0.00596808
light intermediate polypeptide 1	0.00815419	0.0059163
cleavage stimulation factor subunit 2-like	0.00813008	0.00589881
myophilin-like	0.00811124	0.00588514
sulfite mitochondrial	0.00810926	0.00588371
transmembrane 9 superfamily member	0.00808217	0.00586405
chitinase 2	0.00806994	0.00585517
30s ribosomal protein s11	0.00805494	0.00584429
glutaredoxin-related protein 5	0.00803213	0.00582774
branched-chain-amino-acid cytosolic-like	0.00799037	0.00579744
phospholipase a-2-activating protein	0.00797766	0.00578822
h aca ribonucleoprotein complex subunit 2-like protein	0.00796178	0.0057767
retinol dehydrogenase 12	0.00795229	0.00576981
signal recognition particle 72 kda protein	0.00791855	0.00574533
proteasomal ubiquitin receptor adrm1-like	0.00791077	0.00573969
phd finger-like domain-containing protein 5a	0.00789474	0.00572806
parkin coregulated gene	0.0078878	0.00572303
cub and sushi domain-containing protein 3 isoform 2	0.00787072	0.00571063
translation initiation factor subunit	0.00784314	0.00569062
prolactin regulatory element-binding protein	0.00783936	0.00568788
dmd protein	0.00782897	0.00568034
arabinose-5-phosphate isomerase	0.00780941	0.00566615
galactokinase 1	0.00777784	0.00564324
inositol-3-phosphate synthase 1-b-like	0.00776398	0.00563318
viral a-type inclusion	0.00774281	0.00561783
fras1-related extracellular matrix protein 2-like	0.00773994	0.00561574
major antigen	0.00773196	0.00560995
hydroxyacid-oxoacid mitochondrial	0.00772002	0.00560129
frizzled 1-like	0.00771952	0.00560093
zinc-containing alcohol dehydrogenase	0.00771605	0.00559841
nedd8-conjugating enzyme ubc12	0.00771456	0.00559733
karyopherin beta 3	0.00771208	0.00559553
translocon-associated protein subunit alpha-like	0.00771208	0.00559553
1 protein	0.00765054	0.00555088
microsomal glutathione s-transferase- isoform a	0.00764344	0.00554573
testis derived transcript	0.00763778	0.00554162
probable ribosome biogenesis protein rlp24	0.00763203	0.00553744
nucleolar gtp-binding protein 1	0.00763032	0.00553621
peroxisomal acyl-coenzyme a oxidase 3	0.00762963	0.0055357
lysyl oxidase homolog 2-like	0.00761325	0.00552382
follistatin-related protein 5-like	0.00761195	0.00552288
inactive tyrosine-protein kinase 7-like	0.00760286	0.00551629
acyl- -binding protein	0.00759013	0.00550705
transforming acidic coiled-coil-containing protein 1 isoform 2	0.00757504	0.0054961
signal transducer and activator of transcription 5b	0.00757336	0.00549488
copine viii	0.00756945	0.00549204
alkyldihydroxyacetonephosphate peroxisomal	0.00756503	0.00548883
dihydropteridine reductase	0.00756144	0.00548623
arf-gap with dual ph domain-containing protein 1-like	0.00755873	0.00548427
succinate dehydrogenase iron-sulfur mitochondrial precursor	0.00754976	0.00547776
fermitin family homolog 2	0.00754936	0.00547747
frizzled homolog 7a	0.00754717	0.00547588
beta	0.00754527	0.0054745
l-fucose kinase	0.00754303	0.00547287
nicalin-1- partial	0.00753611	0.00546785
probable atp-dependent rna helicase ddx49	0.00752909	0.00546276
trafficking protein particle complex subunit 3	0.00751056	0.00544932
v-ki-ras2 kirsten rat sarcoma viral oncogene homolog	0.00750469	0.00544506
nematocyst outer wall antigen precursor	0.00750188	0.00544301
upf0510 protein inm02 precursor	0.00748663	0.00543195
cysteine mitochondrial	0.00744879	0.0054045
serine-threonine kinase receptor-associated	0.00743494	0.00539445
myg1 protein	0.00742804	0.00538944
ca++ ubiquitous	0.00742693	0.00538864
gualynate kinase-1	0.00742399	0.0053865
er membrane protein complex subunit 10 precursor	0.00742312	0.00538587
glutathione transferase zeta 1	0.00741525	0.00538017
toxin -a-like	0.00741525	0.00538017
protein-glutamine gamma-glutamyltransferase k-like	0.00741046	0.00537668
group 3 secretory phospholipase a2-like	0.00738702	0.00535968
mgc53213 protein	0.00738464	0.00535795
probable nadh dehydrogenase 1 alpha subcomplex subunit 12	0.00738007	0.00535464
erythrocyte protein band -like 3-like	0.00737619	0.00535182
merozoite surface protein partial	0.00736498	0.00534369
ran-specific gtpase-activating protein	0.00735971	0.00533986
protein cgmp- type i	0.00735294	0.00533495
g kinase anchoring protein 1	0.00734803	0.00533139
tropomodulin-3- partial	0.00734677	0.00533047
cysteine mitochondrial-like	0.00734394	0.00532842
antigen p97 (melanoma associated) identified by monoclonal antibodies and	0.00734214	0.00532712
hypothetical protein BRAFLDRAFT_124696	0.00733333	0.00532073
dna replication licensing factor mcm7	0.00729631	0.00529387
sept1_drome ame: full=septin-1 ame: full=diff6 protein homolog ame: full=protein innocent bystander	0.00729594	0.0052936
protein prrc1-a	0.00729547	0.00529325
latrophilin 3-like	0.00728505	0.00528569
leucine zipper transcription factor-like 1	0.00727995	0.00528199
carnitine o-acyltransferase	0.00727618	0.00527926
protein phosphatase 1g	0.00726895	0.00527401
coatomer subunit epsilon	0.00725953	0.00526718
taxilin alpha	0.00723415	0.00524877
tcp1- isoform a	0.00723327	0.00524813
pre-mrna-splicing factor rbm22	0.00717605	0.00520661
exocyst complex component	0.00717579	0.00520642
pyrroline-5-carboxylate reductase 3	0.0071599	0.0051949
gamma-adducin isoform a	0.00713686	0.00517818
protein transport protein sec23a-like	0.00713652	0.00517793
lysosomal alpha-glucosidase preproprotein	0.00711414	0.00516169
adenosine deaminase acting on isoform f	0.00708763	0.00514246
breast carcinoma amplified sequence 2	0.0070613	0.00512335
glyoxalase bleomycin resistance protein dioxygenase	0.00706048	0.00512275
3 (2 ) -bisphosphate nucleotidase 1	0.00705274	0.00511714
lectin 1b	0.00704225	0.00510953
ccr4-not transcription subunit 3	0.00700762	0.0050844
dna replication licensing factor mcm5	0.00700662	0.00508368
choline-phosphate cytidylyltransferase b-like	0.0070028	0.00508091
cysteinyl-trna synthetase	0.00697739	0.00506247
engulfment and cell motility protein 1- partial	0.00696864	0.00505612
low quality protein: von willebrand factor type egf and pentraxin domain-containing protein 1	0.00696379	0.0050526
sodium- and chloride-dependent neurotransmitter transporter	0.00696051	0.00505023
protein transport protein sec61 subunit gamma	0.00692841	0.00502693
mitogen-activated protein kinase-activated protein kinase 2	0.00692042	0.00502113
cub and sushi domain-containing protein 3-like	0.00690064	0.00500678
interferon regulatory factor 8	0.00688542	0.00499574
nadph-dependent fmn reductase	0.00688073	0.00499234
nuclear migration protein nudc	0.00683371	0.00495823
carotenoid oxygenase	0.00682356	0.00495086
unc-119 homolog 2	0.00682335	0.00495071
nicotinate phosphoribosyltransferase-like isoform 1	0.00682128	0.00494921
me1 protein	0.00680277	0.00493578
hydrolase	0.00680272	0.00493574
protein unc-119 homolog a-like	0.00678733	0.00492457
splicing arginine serine-rich 3	0.00678426	0.00492235
retinal rod rhodopsin-sensitive cgmp 3 -cyclic phosphodiesterase subunit delta-like	0.00677711	0.00491716
elongation factor 1-beta-like	0.00677638	0.00491663
thioredoxin-like protein 1-like	0.00675945	0.00490435
3 -5 exonuclease	0.00675676	0.00490239
pyridoxal kinase	0.00668151	0.0048478
utp--glucose-1-phosphate uridylyltransferase	0.0066778	0.0048451
retinoid x receptor	0.00667535	0.00484333
glutamate carboxypeptidase 2	0.00667408	0.00484241
tropomyosin a	0.00661084	0.00479652
dehydrogenase reductase sdr family member 1	0.00658979	0.00478124
tubulin polymerization-promoting protein family member 2	0.00658979	0.00478124
rna polymerase ii ctd	0.00655738	0.00475773
constitutive coactivator of ppar-gamma-like protein 1	0.0065445	0.00474839
signal recognition particle receptor subunit alpha homolog isoform 1	0.0065331	0.00474012
aminophospholipid transporter class type member 1	0.00652533	0.00473448
cleavage stimulation 3 pre-rna subunit 2	0.00652174	0.00473187
hydroxymethylglutaryl- mitochondrial-like	0.00650144	0.00471715
u5 small nuclear ribonucleoprotein 200 kda helicase-like	0.00649819	0.00471479
enhancer of rudimentary homolog	0.00648298	0.00470375
poly binding protein interacting protein 2b	0.00647249	0.00469614
leucine-rich ppr motif-containing mitochondrial-like	0.00647059	0.00469476
elongin b	0.0064498	0.00467968
ribose-5-phosphate isomerase	0.00644068	0.00467306
PREDICTED: hypothetical protein, partial [Hydra magnipapillata]	0.00643246	0.00466709
calcyclin binding protein	0.00642398	0.00466094
protein kinase c and casein kinase substrate in neurons protein 2 isoform 2	0.00637755	0.00462726
sec1 family domain-containing protein 1	0.00637523	0.00462557
katanin p60 atpase-containing subunit a-like 2	0.00636689	0.00461952
sulfide:quinone mitochondrial	0.00635536	0.00461116
4-aminobutyrate mitochondrial	0.00634646	0.0046047
crooked neck-like protein 1	0.00633961	0.00459973
pyridine nucleotide-disulfide oxidoreductase domain-containing protein 2	0.0063358	0.00459696
membrane frizzled-related protein	0.00633312	0.00459502
tropomodulin 1-like	0.00633312	0.00459502
cleavage stimulation 3 pre- subunit 64kda	0.00632111	0.00458631
malignant t cell amplified sequence 1	0.00631923	0.00458494
phosphatidylinositide phosphatase sac1	0.00630069	0.00457149
nad-dependent epimerase	0.00627615	0.00455368
sperm associated antigen 6	0.00627496	0.00455282
protein cdv3 homolog	0.00626741	0.00454734
band -like protein 2- partial	0.00624805	0.00453329
72 kda type iv collagenase precursor	0.0062475	0.0045329
choline-phosphate cytidylyltransferase a	0.00622407	0.00451589
poly	0.00621058	0.00450611
3-phosphoinositide-dependent protein kinase 1-like	0.00618993	0.00449113
prolyl-trna synthetase associated domain-containing protein 1-like	0.0061777	0.00448225
g protein pathway suppressor 1	0.00617174	0.00447793
cyclopropane-fatty-acyl-phospholipid synthase	0.00615148	0.00446323
inactive tyrosine-protein kinase 7 precursor	0.00615051	0.00446252
fact complex subunit spt16	0.0061268	0.00444532
estradiol 17-beta-dehydrogenase 12	0.00612423	0.00444346
vrrb gene product	0.00612042	0.00444069
nidogen-2-like isoform 1	0.00611358	0.00443573
karyopherin beta 3 protein	0.00610661	0.00443068
disintegrin and metalloproteinase domain-containing protein 9	0.00609753	0.00442408
mercaptopyruvate sulfurtransferase	0.00608867	0.00441766
pleckstrin homology domain-containing family a member 2-like	0.00607914	0.00441074
add1 protein	0.00607903	0.00441066
kazal-type serine proteinase inhibitor 2	0.00606849	0.00440301
ctx1_carra ame: full=toxin -a ame: full=crt-1 ame: full= -b ame: full=toxin 1 flags: precursor	0.00606323	0.0043992
ubiquinone biosynthesis monooxygenase coq6	0.0060423	0.00438401
short branched chain specific acyl- mitochondrial-like	0.00603926	0.0043818
iq motif containing gtpase activating protein 1	0.00601531	0.00436443
echinoderm microtubule-associated 6	0.00600894	0.00435981
basement membrane-specific heparan sulfate proteoglycan core	0.006	0.00435332
ubiquitin fusion degradation protein 1 homolog	0.005997	0.00435115
protein apl- isoform b	0.005977	0.00433663
tropomodulin 1	0.00597372	0.00433425
high mobility group protein 20a-like	0.0059671	0.00432945
neuronal pentraxin 1-like	0.00595572	0.0043212
sh2 domain-containing adapter protein b	0.00593824	0.00430851
x-prolyl aminopeptidase (aminopeptidase p) soluble	0.00592833	0.00430132
ariadne ubiquitin-conjugating enzyme e2 binding protein homolog 1	0.00592293	0.0042974
probable atp-dependent rna helicase ddx6	0.00591966	0.00429503
adp-ribose mitochondrial	0.00591612	0.00429247
niemann-pick c1 protein precursor	0.00591447	0.00429126
tropomodulin-1 isoform 1	0.00590667	0.00428561
lupus la	0.00590082	0.00428136
fras1-related extracellular matrix protein 2	0.00589635	0.00427812
dolichyl-diphosphooligosaccharide--protein glycosyltransferase subunit stt3a	0.00588755	0.00427173
four and a half lim domains protein 2	0.00587372	0.0042617
methionine aminopeptidase 2-like isoform 1	0.00587248	0.0042608
lipoma-preferred partner homolog	0.00585106	0.00424526
trk-fused gene	0.00584772	0.00424284
mrna turnover protein 4 homolog	0.00584309	0.00423948
epsin 2	0.00584307	0.00423946
alanyl-trna synthetase domain containing 1	0.00583864	0.00423625
epithelial splicing regulatory protein 2-like	0.00583374	0.00423269
multidrug resistance protein partial	0.00582524	0.00422653
erythrocyte protein band -like 3	0.00581395	0.00421834
gamma-glutamyl hydrolase-like	0.00581091	0.00421613
cubilin	0.00580905	0.00421478
integrase core domain protein	0.00580192	0.00420961
pre-mrna-processing factor 19	0.00577521	0.00419023
nucleoporin 153kda	0.00577428	0.00418955
aminoacyl trna synthase complex-interacting multifunctional protein 2	0.00576606	0.00418359
meprin a alpha-like	0.0057554	0.00417585
atrial natriuretic peptide receptor 1-like	0.00575289	0.00417403
molybdenum cofactor synthesis protein cinnamon	0.00575185	0.00417328
short branched chain specific acyl- mitochondrial	0.00574438	0.00416785
long-chain fatty acid transport protein 4-like	0.00572519	0.00415393
upf0468 protein c16orf80 homolog	0.00571973	0.00414997
gamma-glutamyltranspeptidase 1	0.00571731	0.00414822
presequence translocated-associated motor subunit pam17	0.00570613	0.00414011
oxidoreductase htatip2-like	0.00570497	0.00413926
neurogenic locus notch homolog protein 2-like	0.00569073	0.00412893
uridine-cytidine kinase 2	0.00568828	0.00412715
keratin-associated protein 9-1-like	0.00568304	0.00412335
tumor protein p53 inducible protein 3	0.00566974	0.0041137
numb protein	0.00566751	0.00411208
lamin-b receptor	0.00566038	0.00410691
pan domain protein	0.0056362	0.00408937
coatomer protein subunit gamma	0.0056338	0.00408763
glutathione s-transferase theta-1-like	0.00562928	0.00408435
coatomer subunit gamma-2	0.00561207	0.00407186
phosphatidylinositol 5-phosphate 4-kinase type-2 alpha-like	0.00560845	0.00406923
carnitine o-acetyltransferase-like	0.00559701	0.00406094
diazepam binding inhibitor	0.00559441	0.00405904
glycerol-3-phosphate dehydrogenase	0.00559441	0.00405904
plexin domain-containing protein 1-like	0.00558223	0.00405021
extracellular matrix protein fras1	0.00555556	0.00403085
tumor suppressor candidate 3	0.00555556	0.00403085
multidrug resistance protein 1-like	0.00555556	0.00403085
sodium-dependent neutral amino acid transporter b at2-like	0.00555122	0.00402771
2-amino-3-carboxymuconate-6-semialdehyde decarboxylase	0.00554866	0.00402585
single-stranded dna-binding mitochondrial	0.00554785	0.00402526
was protein family homolog 1	0.00554529	0.0040234
growth arrest-specific protein 1-like	0.00553506	0.00401598
n-acetylated-alpha-linked acidic dipeptidase 2-like	0.0055325	0.00401413
internalin protein	0.00550964	0.00399754
probable 2-oxoglutarate dehydrogenase e1 component mitochondrial-like	0.00550964	0.00399754
phospholipase b-like 2-like	0.00548392	0.00397888
follistatin isoform 2	0.00548082	0.00397663
toll interacting protein	0.00547916	0.00397542
alpha-adducin isoform 2	0.00547445	0.00397201
probable palmitoyltransferase zdhhc14-like	0.00546902	0.00396807
trna (guanine-n -)-methyltransferase	0.00544537	0.00395091
disabled homolog 2	0.00544013	0.00394711
leucine-rich repeat-containing protein 47-like	0.00543057	0.00394017
glyoxylate reductase hydroxypyruvate reductase-like	0.00540958	0.00392494
glutathione peroxidase 1	0.00539582	0.00391496
polya-binding protein interacting	0.00539447	0.00391398
pgap2-interacting protein isoform 2	0.00536193	0.00389037
sperm-associated antigen 7	0.00535906	0.00388828
deoxyuridine 5 -triphosphate nucleotidohydrolase	0.00534237	0.00387618
gtp:amp mitochondrial-like	0.00533808	0.00387306
set1 ash2 histone methyltransferase complex subunit ash2	0.00532198	0.00386138
leukotriene a-4 hydrolase	0.00531915	0.00385933
dpy30 domain-containing protein 1-like	0.00530973	0.0038525
tousled-like kinase	0.00529316	0.00384047
haloacid dehalogenase-like hydrolase domain containing 1a	0.00527426	0.00382676
dynamin 1	0.00527192	0.00382506
sel1 domain protein repeat-containing protein	0.00527026	0.00382386
lysine decarboxylase	0.0052597	0.00381619
tyrosyl-trna synthetase	0.00525762	0.00381469
band -like protein 2 isoform b	0.00524934	0.00380868
granulins precursor	0.00524934	0.00380868
glutamate decarboxylase 1	0.00524192	0.00380329
glutamate decarboxylase 1-like	0.00524171	0.00380314
cleavage and polyadenylation specificity factor subunit 3	0.00521999	0.00378738
signal recognition particle 68 kda protein	0.00521648	0.00378484
l-gulonolactone oxidase	0.00521135	0.00378111
cysteine rich bmp regulator 2	0.00518855	0.00376457
short isoform a	0.00518602	0.00376274
gamma-interferon-inducible lysosomal thiol reductase	0.00513699	0.00372716
dynein light chain roadblock-type 2	0.00513347	0.00372461
tm2 domain-containing protein cg11103-like	0.00513306	0.00372431
centrin-1	0.00512767	0.0037204
glycogenin 1	0.00511696	0.00371263
protein fam160b1	0.00510856	0.00370653
wd sam and u-box domain-containing protein 1	0.00510783	0.00370601
kazal-type proteinase inhibitor	0.00509344	0.00369556
signal peptidase complex subunit 1-like	0.0050822	0.00368741
mitotic checkpoint protein bub3	0.00507653	0.00368329
gamma-glutamyltransferase 1	0.0050738	0.00368132
transportin-1 isoform 1	0.00506009	0.00367137
endothelial differentiation-related factor 1	0.00505561	0.00366812
swi/snf	0.00504372	0.00365949
retinoblastoma-like 1	0.00503778	0.00365518
protein kinase c delta	0.00502513	0.003646
transcriptional regulator	0.00502035	0.00364254
sideroflexin 5	0.00501505	0.00363868
protein lsm12 homolog	0.004995	0.00362414
PREDICTED: hypothetical protein LOC100634692 [Amphimedon queenslandica]	0.00499303	0.00362271
big brother	0.00496855	0.00360495
sperm-associated antigen 7 homolog	0.00496524	0.00360255
ctp synthase 1	0.0049639	0.00360158
glucosamine-6-phosphate isomerase 2	0.00495751	0.00359694
smoothelin-like protein 1	0.0049562	0.00359599
tryptophanyl-trna synthetase	0.00493963	0.00358396
telomerase protein component 1-like	0.00492971	0.00357677
glycogen synthase kinase-3 beta	0.00492611	0.00357416
tnf receptor-associated factor 4	0.00491918	0.00356913
soluble calcium-activated nucleotidase 1	0.0049054	0.00355913
protein fam160b1-like	0.00489596	0.00355228
rab35 member ras oncoprotein family	0.00487805	0.00353929
protein couch potato-like	0.00487112	0.00353426
zinc transporter	0.0048536	0.00352155
pre-mrna-processing factor 17	0.00484615	0.00351614
flavin reductase-like	0.00481688	0.00349491
neutral alpha-glucosidase ab-like	0.00481116	0.00349076
atp-dependent zinc metalloprotease yme1l1-like	0.00480769	0.00348824
upf0587 protein c1orf123 homolog	0.00479925	0.00348211
cysteine and histidine-rich domain-containing protein 1	0.00478334	0.00347057
tpa_inf: hn1-like protein	0.0047571	0.00345153
spermidine synthase	0.0047532	0.00344871
all-trans-retinol -reductase-like	0.00475162	0.00344756
atlastin- partial	0.00472558	0.00342866
gamma-butyrobetaine dioxygenase-like	0.0047081	0.00341598
hemicentin-1 precursor	0.0047081	0.00341598
5-oxoprolinase	0.00469694	0.00340788
dbh-like monooxygenase protein 1	0.00469484	0.00340636
pre-mrna-splicing factor syf1-like	0.00469484	0.00340636
transmembrane protease serine 6-like	0.00469354	0.00340542
piwi-like protein 2	0.00468384	0.00339838
protein scribble homolog	0.00468019	0.00339573
prolyl 4-hydroxylase subunit alpha-1-like	0.00466893	0.00338756
hydroxysteroid (17-beta) dehydrogenase 4	0.0046652	0.00338486
hnrpul1 protein	0.00465839	0.00337991
ferm domain containing 3	0.00465116	0.00337467
prefoldin subunit 1	0.00465116	0.00337467
low quality protein: hemicentin-1-like	0.00463822	0.00336528
dcn1-like protein 4 isoform 2	0.00462963	0.00335905
cd151 molecule (raph blood group)	0.00462238	0.00335379
dystonin isoform 2	0.00461787	0.00335051
oligopeptidase a	0.00461698	0.00334987
methionyl aminopeptidase 2	0.00461133	0.00334577
segment polarity protein dishevelled homolog dvl-3-like	0.00460829	0.00334357
leucine rich repeat containing 16a	0.00459335	0.00333272
protein kinase c inhibitor	0.00458716	0.00332823
methylenetetrahydrofolate dehydrogenase 1	0.00458015	0.00332315
cop9 signalosome complex subunit 6	0.00457736	0.00332112
nuclear protein localization protein 4 homolog	0.00457666	0.00332061
wiskott-aldrich syndrome protein family member 3	0.00457143	0.00331682
eukaryotic initiation factor 4a-iii	0.00455927	0.003308
cop9 signalosome complex subunit 4	0.00453662	0.00329156
protein wwp- isoform b	0.00453662	0.00329156
traf2 and nck interacting tnik	0.00453001	0.00328677
rap guanine nucleotide exchange factor 1-like	0.00451807	0.0032781
charged multivesicular body protein 5	0.00451642	0.00327691
flap endonuclease 1	0.00451128	0.00327317
tektin a1	0.0045102	0.00327239
sickle tail protein homolog	0.00449996	0.00326496
rwd domain-containing protein	0.00449775	0.00326336
methionyl-trna synthetase	0.00449294	0.00325987
alpha-1-macroglobulin- partial	0.00448682	0.00325543
vitamin k-dependent protein c-like protein	0.00447928	0.00324996
replication protein 32kda	0.00446828	0.00324197
spermatogenesis-associated protein 6-like	0.00446126	0.00323688
cleavage and polyadenylation specificity factor subunit 6-like isoform 3	0.00445151	0.00322981
ubiquinone biosynthesis protein coq7 homolog	0.00444939	0.00322827
cleft lip and palate transmembrane protein 1-like protein	0.00444285	0.00322353
protein disulfide-isomerase partial	0.00443459	0.00321753
sparc cwcv and kazal-like domains proteoglycan 2-like	0.0044226	0.00320884
3-ketodihydrosphingosine reductase precursor	0.00440852	0.00319862
dickkopf-like protein 1	0.00440529	0.00319627
lysophosphatidic acid phosphatase type 6 precursor	0.00440529	0.00319627
peroxisomal trans-2-enoyl- reductase	0.00440141	0.00319346
tnf receptor associated factor	0.00439239	0.00318691
dolichyl-phosphate mannosyltransferase polypeptide catalytic subunit	0.00438596	0.00318225
barrier-to-autointegration factor	0.00437318	0.00317298
neural cell adhesion molecule l1-like	0.00437222	0.00317228
park2 co-regulated	0.00434783	0.00315458
la-related protein 1b	0.00434573	0.00315306
chloride intracellular channel protein 2	0.00434468	0.0031523
major facilitator transporter	0.00434088	0.00314954
vesicular integral-membrane protein vip36-like	0.00433684	0.00314661
glucose-methanol-choline oxidoreductase	0.00433088	0.00314229
af239837_1nidogen 1	0.00433069	0.00314215
n-terminal ef-hand calcium-binding protein 1	0.004329	0.00314093
polypeptide n-acetylgalactosaminyltransferase 2-like	0.00432199	0.00313584
mandelate racemase muconate lactonizing protein	0.00430416	0.0031229
n -(beta-n-acetylglucosaminyl)-l-asparaginase-like	0.00430339	0.00312234
myc-induced nuclear antigen	0.00430293	0.003122
nucleoporin 93kda	0.00429185	0.00311396
methylase involved in ubiquinone menaquinone biosynthesis	0.00428992	0.00311257
bone morphogenetic protein 1-like	0.00428367	0.00310804
PREDICTED: hypothetical protein [Ciona intestinalis]	0.00428082	0.00310597
glycine cleavage system h mitochondrial-like	0.0042796	0.00310508
parkin coregulated gene protein homolog	0.0042735	0.00310066
asparaginyl-trna cytoplasmic	0.00426338	0.00309331
glutaryl-coenzyme a dehydrogenase	0.00425894	0.00309009
metabotropic glutamate receptor 4-like	0.00425532	0.00308746
aminopeptidase n	0.00425286	0.00308568
c2 domain-containing protein	0.00424757	0.00308184
glutaryl- mitochondrial-like	0.00421585	0.00305883
glucosamine-6-phosphate deaminase 2	0.00420168	0.00304855
allorecognition 1	0.00420077	0.00304789
serpin b4-like	0.0042005	0.00304769
luc7-like 2 ( cerevisiae)	0.00419989	0.00304725
acetyl- acetyltransferase	0.00419162	0.00304124
amoeboid myosin i-like	0.00415722	0.00301629
atpase asna1	0.00415282	0.0030131
signal peptidase complex subunit 3	0.00414365	0.00300644
dynamin 1-like isoform 2	0.00414079	0.00300436
dead (asp-glu-ala-asp) box polypeptide 21	0.00413983	0.00300367
macpf domain containing protein	0.00413508	0.00300022
smtn protein	0.00412632	0.00299386
slit-robo rho gtpase-activating protein 1	0.00412541	0.00299321
prosaposin	0.00412294	0.00299141
peroxidase	0.00411523	0.00298582
clavaminate synthase-like protein at3g21360-like	0.00410877	0.00298113
lethal giant larvae protein homolog 1	0.00410362	0.00297739
kynureninase (l-kynurenine hydrolase)	0.00408879	0.00296663
aegp_human ame: full=apical endosomal glycoprotein ame: full=mam domain-containing protein 4 flags: precursor	0.00408441	0.00296346
tpa_inf: rtn4-a1w	0.00406758	0.00295125
protein phosphatase regulatory subunit 1	0.00406504	0.00294941
heat repeat-containing protein 7a	0.00406441	0.00294894
protein tyrosine	0.00406026	0.00294594
cell division cycle 5-like protein	0.00405904	0.00294505
hexokinase-2-like isoform 1	0.00405817	0.00294442
dolichyl-diphosphooligosaccharide--protein glycosyltransferase subunit stt3b-like	0.00405797	0.00294428
low-density lipoprotein receptor-related protein 6-like	0.0040568	0.00294342
pericentriolar material 1	0.00402576	0.0029209
phosphatidylinositol-5-phosphate 4-kinase type-2 alpha	0.00402145	0.00291778
ddrgk domain-containing protein 1-like	0.00401316	0.00291176
phosphoglycolate phosphatase-like	0.00401204	0.00291095
atp-dependent zinc metalloprotease yme1l1 isoform 2	0.00401167	0.00291068
glutathione transferase	0.00400687	0.0029072
6-phosphofructo-2-kinase fructose- 6-biphosphatase 4	0.00399202	0.00289642
sumo-activating enzyme subunit 1	0.00398671	0.00289257
nhp2 non-histone chromosome protein 2-like 1	0.00398406	0.00289065
creb-regulated transcription coactivator 2	0.00398307	0.00288993
ww domain binding protein	0.00397922	0.00288714
protein disulfide isomerase-associated 3 precursor	0.00397854	0.00288665
16 kda	0.0039604	0.00287348
fatty-acyl reductase 4	0.00395257	0.0028678
dna topoisomerase 2-beta- partial	0.00395083	0.00286654
seryl-trna synthetase	0.0039349	0.00285498
zgc:173439 protein	0.00393185	0.00285277
low-density lipoprotein receptor-related protein 2	0.00392927	0.0028509
tartrate-resistant acid phosphatase type 5 precursor	0.00392157	0.00284531
nucleoredoxin-like protein 2	0.00391007	0.00283696
u6 snrna-associated sm-like protein lsm2	0.00389864	0.00282867
glutamate carboxypeptidase 2- partial	0.00388543	0.00281909
dynactin subunit 1	0.00387774	0.00281351
phenylalanyl-trna mitochondrial	0.00386847	0.00280678
eukaryotic peptide chain release factor gtp-binding subunit erf3a	0.00386548	0.00280461
egg bindin receptor 1 precursor	0.003861	0.00280137
furin 2	0.00385356	0.00279597
5 -amp-activated protein kinase subunit beta-2	0.00383509	0.00278256
tpa_inf: occludin-related y protein	0.00383142	0.0027799
ist1 homolog	0.00382223	0.00277323
dcn1-like protein 5	0.00381679	0.00276929
rna polymerase ii second largest subunit	0.00380228	0.00275876
activator of 90 kda heat shock protein atpase homolog 1	0.00379872	0.00275618
u6 snrna-associated sm-like protein lsm1-like	0.00379267	0.00275178
myc induced nuclear antigen	0.00377786	0.00274104
alpha-endosulfine	0.00376727	0.00273335
klraq motif-containing protein 1 isoform 1	0.00375505	0.00272449
nonribosomal peptide synthetase 10	0.00375028	0.00272103
45 kda calcium-binding protein	0.00375	0.00272083
cg31028 cg31028-pb	0.00374065	0.00271404
g kinase-anchoring protein 1-like	0.00373599	0.00271066
golgi to er traffic protein 4 homolog	0.00373483	0.00270982
glutaminyl-peptide cyclotransferase-like	0.00373471	0.00270973
proline-rich extensin-like family protein	0.0037037	0.00268724
rib43a-like with coiled-coils protein 2-like	0.0037037	0.00268724
hexokinase domain containing 1	0.00369458	0.00268062
snare-associated protein snapin-like	0.00369004	0.00267732
hypothetical protein BATDEDRAFT_90680 [Batrachochytrium dendrobatidis JAM81]	0.00368324	0.00267239
acid phosphatase lysosomal	0.00367647	0.00266748
PREDICTED: hypothetical protein LOC100490910 [Xenopus (Silurana) tropicalis]	0.00364631	0.00264559
exportin-1	0.00364182	0.00264233
armadillo repeat-containing protein 4	0.00363956	0.0026407
protein will die slowly-like	0.00363932	0.00264052
50s ribosomal protein l20	0.00363636	0.00263838
ShK domain-like	0.00363372	0.00263646
symplekin	0.00360425	0.00261508
pgap2-interacting protein	0.0036036	0.00261461
dna replication licensing factor mcm2	0.0036031	0.00261425
myeloid differentiation primary response gene 88	0.00359712	0.00260991
1-aminocyclopropane-1-carboxylate synthase-like protein 1	0.00357782	0.0025959
sjchgc05781 protein	0.00357782	0.0025959
splicing proline- and glutamine-rich-like	0.00357211	0.00259176
signal transducer and activator of transcription	0.0035668	0.0025879
epidermal growth factor-like protein 7-like	0.00355872	0.00258204
mitogen-activated protein kinase kinase 6	0.00355872	0.00258204
casein kinase alpha 1	0.00355114	0.00257654
ccr4-not transcription complex subunit 1	0.0035447	0.00257187
peptide mitochondrial	0.00354191	0.00256985
developmentally-regulated gtp-binding protein 2	0.00353857	0.00256742
keratinocyte-associated protein 2-like	0.00353774	0.00256682
mannosyl-oligosaccharide glucosidase	0.00352983	0.00256108
cdc42 small effector protein 2	0.00352941	0.00256078
agrin (synaptic protein) homolog family member (agr-1)	0.00352645	0.00255863
arf gtpase-activating protein git2-like	0.00351151	0.00254779
splicing arginine serine-rich 2	0.00351	0.0025467
acidic coiled-coil containing protein 1	0.00350877	0.0025458
serine dehydratase-like	0.00350058	0.00253986
retinoblastoma-like protein 2	0.00349447	0.00253542
decapping protein isoform a	0.00348837	0.002531
ccr4-not transcription complex subunit 3	0.00348779	0.00253058
fibroblast activation protein	0.00348653	0.00252966
eps15l1 protein	0.00348432	0.00252806
elav-like protein 2- partial	0.00346449	0.00251367
protein vav-like	0.00346313	0.00251269
leucine-rich repeat-containing protein 16a	0.00345954	0.00251008
protein hook homolog 3	0.00344927	0.00250263
hcfc1 protein	0.00344828	0.00250191
alpha-mannosidase 2	0.00344302	0.0024981
sacs protein	0.00344234	0.0024976
ccr4-not transcription complex subunit 3 isoform 2	0.00343643	0.00249331
rho-associated protein kinase 2-like	0.00343315	0.00249093
voltage-gated calcium channel beta subunit	0.00343012	0.00248874
28s ribosomal protein mitochondrial	0.00341442	0.00247735
epidermal growth factor receptor pathway substrate 15-like 1	0.00341297	0.00247629
nhp2-like protein 1	0.00341297	0.00247629
a0zn06_nodsp hemagglutinin-related protein	0.00340528	0.00247071
dystrophin	0.00340426	0.00246997
carnitine o-acetyltransferase	0.00339367	0.00246229
niemann-pick type c1 domain-containing -like	0.00339367	0.00246229
dystrophin-like isoform 2	0.00338696	0.00245742
3 -5 exonuclease domain-containing protein	0.00338579	0.00245657
phosphatidylinositol transfer protein alpha isoform-like	0.00338123	0.00245327
bro1 domain-containing protein brox	0.00338066	0.00245285
3-mercaptopyruvate sulfurtransferase-like isoform 1	0.00337838	0.0024512
replication protein a 70 kda dna-binding subunit	0.00337025	0.00244529
flagellar attachment zone protein 1-like	0.003367	0.00244294
ab1ip_chick ame: full=amyloid beta a4 precursor protein-binding family b member 1-interacting protein ame: full=apbb1-interacting protein 1	0.00336197	0.00243929
nadh dehydrogenase 1 alpha subcomplex subunit 13	0.00336189	0.00243923
nodal modulator 1 precursor	0.0033541	0.00243358
lyr motif-containing protein 4	0.00335295	0.00243275
macrophage mannose receptor 1-like	0.00335277	0.00243261
dual 3 -cyclic-amp and -gmp	0.00335059	0.00243104
ubiquitin domain-containing protein ubfd1	0.00334825	0.00242934
fungal metazoan origin like protein variant 2	0.00334776	0.00242898
upf0661 tpr repeat-containing	0.00334448	0.0024266
programmed cell death	0.00334076	0.0024239
cytokine induced apoptosis inhibitor 1	0.0033389	0.00242255
protein phosphatase 1b isoform 2	0.00333148	0.00241717
hypothetical protein NATL1_01011 [Prochlorococcus marinus str. NATL1A]	0.00332963	0.00241583
extracellular sulfatase sulf-1	0.00332686	0.00241382
x-ray repair cross-complementing protein 5-like	0.00330673	0.00239921
nidogen-1 isoform 1	0.00330579	0.00239852
metal transporter cnnm2-like	0.00330462	0.00239768
n-alpha-acetyltransferase 50	0.00330396	0.0023972
retinoid x receptor-like protein	0.00329507	0.00239075
bola-like protein 3-like	0.00329489	0.00239062
g protein-coupled receptor kinase interacting 2	0.00329144	0.00238812
tankyrase 1 binding protein 1	0.00328212	0.00238135
tripeptidyl-peptidase 2	0.00328117	0.00238067
hydroxymethylglutaryl- mitochondrial precursor	0.00327065	0.00237303
muconolactone delta-isomerase	0.00327065	0.00237303
protein archease-like	0.00325203	0.00235952
samd14 protein	0.00324886	0.00235722
aryl hydrocarbon receptor interacting protein	0.0032345	0.0023468
branched chain keto acid dehydrogenase beta polypeptide	0.00322321	0.00233861
cbp80 20-dependent translation initiation factor	0.00321866	0.00233531
steroid 17-alpha-hydroxylase lyase-like	0.00321669	0.00233388
ampd2 protein	0.00321027	0.00232923
kh domain- rna- signal transduction-associated protein 2	0.00321027	0.00232922
general transcription factor polypeptide beta 34kda	0.00320513	0.00232549
alanine--glyoxylate aminotransferase 2-like	0.00319616	0.00231899
probable imidazolonepropionase-like	0.00318878	0.00231363
nucleoside diphosphate kinase 7	0.00316965	0.00229975
integrator complex subunit 1-like	0.0031679	0.00229848
leucine-rich repeat-containing protein 7-like	0.00315333	0.00228791
chromobox protein homolog 1-like	0.00315194	0.0022869
cytoskeleton associated protein 5	0.00314663	0.00228305
comm domain-containing protein 10	0.00314347	0.00228075
protein ariadne-	0.00314218	0.00227982
ubtf protein	0.0031407	0.00227875
h aca ribonucleoprotein complex subunit 4	0.0031348	0.00227446
phytoene dehydrogenase and related protein	0.00313339	0.00227344
spg7 partial	0.00312853	0.00226991
mgc89871 protein	0.00312012	0.00226382
bone morphogenetic protein 7-like	0.00311527	0.0022603
dorsal switch protein 1	0.00310318	0.00225152
risc-loading complex subunit tarbp2-like	0.00310146	0.00225028
xanthine dehydrogenase	0.00309856	0.00224817
ubiquitin-associated protein 2	0.00309278	0.00224398
trna-splicing ligase homolog	0.00308778	0.00224035
allograft inflammatory factor 1	0.00308325	0.00223706
riken cdna 0610007p06 variant 2	0.00308008	0.00223477
phosphoribosyl pyrophosphate synthetase-associated protein 2	0.00307292	0.00222957
sortilin-related receptor	0.00307272	0.00222942
glycerol-3-phosphate acyltransferase 3	0.00307062	0.0022279
wd40 repeat-containing protein smu1	0.00306018	0.00222033
copine iii isoform 1	0.00305188	0.0022143
pre-mrna-splicing regulator wtap	0.00305188	0.0022143
calmodulin 2-like	0.00304569	0.00220981
cat eye syndrome chromosome candidate 1	0.00304348	0.00220821
abhydrolase domain containing protein	0.00303523	0.00220222
protein farnesyltransferase geranylgeranyltransferase type-1 subunit alpha	0.00302801	0.00219698
ataxin-2-like protein	0.00302755	0.00219665
wash complex subunit 7	0.00302477	0.00219463
arylsulfatase b	0.00302343	0.00219366
orn dap arg decarboxylase 2	0.00301872	0.00219024
cg15040 cg15040- partial	0.00301866	0.0021902
gtp cyclohydrolase 1 feedback regulatory protein	0.0030166	0.00218871
protein disulfide-isomerase a6	0.00301205	0.0021854
tryptophan -dioxygenase	0.00301205	0.0021854
nematocyst outer wall antigen	0.00300978	0.00218376
protein agr-1	0.00300752	0.00218212
sh3-domain grb2-like 2	0.00300429	0.00217978
metastasis-associated protein mta3	0.0030021	0.00217819
alanine aminotransferase 2-like	0.002997	0.00217449
g protein-coupled receptor kinase interactor 2	0.00299401	0.00217232
u6 snrna-associated sm-like protein lsm8	0.00299401	0.00217232
tryptophan oxygenase	0.00298507	0.00216583
low quality protein: dnaj homolog subfamily c member 13-like	0.00295977	0.00214748
casein kinase i isoform alpha isoform 1	0.00295858	0.00214661
hypothetical protein BRAFLDRAFT_124958	0.00295421	0.00214344
enabled homolog	0.00295203	0.00214186
multidrug resistance protein 1	0.00294985	0.00214028
transmembrane and coiled-coil domains protein 1 isoform a	0.00294889	0.00213958
phosphatidylglycerol phosphatidylinositol transfer protein	0.0029418	0.00213444
carnitine o-palmitoyltransferase liver isoform	0.0029383	0.00213189
ceramide synthase 5	0.0029347	0.00212928
protein bicaudal d homolog 1-like	0.00293109	0.00212667
duf1772-domain-containing protein	0.00292826	0.00212461
calcium uptake protein 1 mitochondrial	0.00292398	0.0021215
probable arylformamidase	0.00292184	0.00211995
nedd8 activating enzyme e1 subunit 1	0.00292124	0.00211952
low quality protein: ubiquitin carboxyl-terminal hydrolase 7	0.00292113	0.00211944
dead box atp-dependent rna helicase	0.00291715	0.00211655
probable palmitoyltransferase zdhhc14 isoform 2	0.00291687	0.00211635
lem domain containing 3	0.00291545	0.00211532
n-lysine methyltransferase setd8-like	0.00291122	0.00211225
probable protein brick1	0.00290698	0.00210917
serine carboxypeptidase 1	0.0029036	0.00210672
fc fragment of binding protein	0.00289645	0.00210153
asparagine synthetase	0.00289575	0.00210102
acylamino-acid-releasing enzyme-like	0.00289051	0.00209722
adam 17-like protease-like	0.00289017	0.00209698
peptide methionine sulfoxide reductase	0.00288721	0.00209483
striatin-3 isoform 1	0.00288487	0.00209313
follistatin-related protein 4 precursor	0.00287356	0.00208492
novel protein vertebrate copine iv	0.00287179	0.00208364
mchain complex of the 2nd and 3rd lim domains of tes with the evh1 domain of mena and the n-terminal domain of actin-like protein arp7a	0.00286944	0.00208193
stk3 protein	0.00286944	0.00208193
chromobox-like protein 5	0.00286821	0.00208104
copine iii-like	0.00285773	0.00207343
udp-glucose:glycoprotein glucosyltransferase 1	0.00285423	0.0020709
protein dgcr6	0.00285414	0.00207083
amyotrophic lateral sclerosis 2 chromosomal region candidate gene 8	0.00285307	0.00207005
nidogen 2 precursor	0.00285225	0.00206946
glycerol kinase	0.00285171	0.00206907
lysosome-associated membrane glycoprotein 1-like	0.00284698	0.00206563
centrin-2- partial	0.0028463	0.00206514
regulator of chromosome condensation	0.00282885	0.00205249
charged multivesicular body protein 3	0.00282486	0.00204959
glutamate cysteine ligase	0.00282087	0.0020467
trafficking protein particle complex subunit 4	0.00282008	0.00204612
charged multivesicular body protein 1b-like	0.0028169	0.00204381
signal peptidase complex subunit 1	0.0028169	0.00204381
krr1 small subunit processome component partial	0.00281613	0.00204325
upf0505 protein c16orf62 homolog	0.00281057	0.00203922
sumo-activating enzyme subunit 2	0.00280505	0.00203521
apoptotic chromatin condensation inducer 1	0.00280331	0.00203395
cystatin-b	0.00279585	0.00202854
glutamine synthetase	0.00278843	0.00202315
ring finger protein 17-like	0.00278663	0.00202185
cre-nas-13 protein	0.00278164	0.00201823
smoothelin-like protein 2	0.00278164	0.00201823
sulfotransferase 1c2a-like	0.00277778	0.00201543
calpain isoform cra_a	0.0027735	0.00201232
phospholipase gamma 1	0.00277008	0.00200984
dutpase putaive	0.00275103	0.00199602
hypothetical protein BRAFLDRAFT_124727 [Branchiostoma floridae]	0.00274725	0.00199328
fad dependent oxidoreductase	0.00274631	0.0019926
retinoblastoma-like 2	0.00274098	0.00198873
merozoite surface protein 2	0.00273973	0.00198782
pkd domain-containing protein	0.00273832	0.0019868
calcium-binding mitochondrial carrier protein aralar1-like	0.00273224	0.00198239
choline transporter-like protein 2	0.00272923	0.00198021
dna-damage inducible protein	0.0027278	0.00197917
zinc-binding alcohol dehydrogenase domain-containing protein 2	0.00272035	0.00197376
katanin p60 atpase-containing subunit a1	0.00271887	0.00197269
protein bud31 homolog	0.0027137	0.00196894
hypothetical protein BRAFLDRAFT_74509 [Branchiostoma floridae]	0.00269724	0.001957
kinase gamma	0.00269058	0.00195216
nematocilin a	0.00268854	0.00195068
nedd8-activating enzyme e1 catalytic subunit isoform 2	0.00268531	0.00194834
zygotic dna replication licensing factor mcm6-a-like	0.00268017	0.0019446
probable ubiquitin carboxyl-terminal hydrolase faf-x	0.00267816	0.00194315
cdc42 binding protein kinase alpha (dmpk-like)	0.00267156	0.00193836
membrane-associated guanylate	0.00267142	0.00193826
nuclear transcription factor gamma	0.00267023	0.00193739
regulatory factor 3	0.00266667	0.00193481
caax prenyl protease 1 homolog	0.00266099	0.00193069
spindle-pole body protein	0.00265957	0.00192966
selenocysteine-specific elongation factor	0.00265675	0.00192761
extended synaptotagmin-2	0.00265164	0.00192391
thioredoxin-related transmembrane protein 2	0.00264915	0.0019221
jc7958galaxin precursor - reef coral	0.00264375	0.00191819
glycogen synthase kinase 3 beta	0.00263852	0.00191439
dna replication licensing factor mcm4	0.00263644	0.00191288
der1-like domain member 1	0.00263505	0.00191187
dedicator of cytokinesis protein 7	0.0026344	0.0019114
carbonic anhydrase	0.00263273	0.00191019
nicalin	0.00263158	0.00190935
inosine triphosphate pyrophosphatase	0.00262467	0.00190434
acyl- dehydrogenase family member 10	0.00261552	0.0018977
n-myristoyltransferase 2	0.0026096	0.00189341
thap domain-containing protein 9-like	0.00260643	0.0018911
rpe-spondin-like	0.0026053	0.00189028
poly-u binding splicing factor 60kda	0.00260492	0.00189001
dna replication licensing factor mcm6	0.00259441	0.00188238
alpha-2-macroglobulin- partial	0.002594	0.00188208
adhesion regulating molecule 1	0.00259235	0.00188089
5 -nucleotidase domain-containing protein 1	0.00259067	0.00187967
endoplasmic reticulum-golgi intermediate compartment protein 1	0.00258901	0.00187847
hypothetical protein SINV_01419 [Solenopsis invicta]	0.00258844	0.00187805
syndecan binding protein	0.00258565	0.00187603
acetate kinase	0.002584	0.00187483
eukaryotic translation elongation factor 1 epsilon 1	0.00258398	0.00187482
beta-adrenergic receptor kinase 2	0.00257898	0.00187119
suppressor of ty 5 homolog	0.00257732	0.00186998
intraflagellar transport protein 27 homolog	0.00256739	0.00186278
low density lipoprotein receptor-related protein 4	0.00256465	0.00186079
enhancer of mrna-decapping protein 3-like	0.0025641	0.00186039
proprotein convertase subtilisin kexin type 1	0.00256246	0.0018592
endothelin-converting enzyme 2-like	0.00254777	0.00184854
acyl- synthetase short-chain family member 2	0.00254453	0.00184619
cell adhesion molecule	0.00252951	0.0018353
chitin binding peritrophin-a domain containing protein	0.00252207	0.0018299
platelet-activating factor acetylhydrolase ib subunit alpha	0.00251678	0.00182606
suppressor of g2 allele of skp1	0.00251414	0.00182415
activin-like protein	0.0025113	0.00182208
enhancer of mrna-decapping protein 3	0.00250313	0.00181615
pantothenate kinase 4	0.00250179	0.00181518
mam and ldl-receptor class a domain-containing protein c10orf112-like	0.00249626	0.00181117
msx2-interacting protein	0.00248344	0.00180187
tolloid-like protein 1-like	0.00248093	0.00180004
dr1-associated corepressor	0.00247321	0.00179444
dolichyl-diphosphooligosaccharide--protein glycosyltransferase subunit stt3b	0.00246566	0.00178897
chloride intracellular channel protein 1-like	0.00246548	0.00178884
ef-hand domain-containing family member c2-like	0.00246305	0.00178708
hypothetical protein CAPTEDRAFT_113601	0.002457	0.00178269
multiple pdz domain protein	0.00245107	0.00177838
dna topoisomerase 1	0.00244916	0.001777
sarcolemmal membrane-associated protein isoform 2	0.00244598	0.00177469
c-3 sterol dehydrogenase 3-beta-hydroxysteroid	0.00243457	0.00176641
acyl- dehydrogenase family member mitochondrial	0.00243072	0.00176362
superkiller viralicidic activity 2-like 2	0.00242866	0.00176212
protein transport protein sec24b-like	0.00241935	0.00175537
thioredoxin-related transmembrane protein 1-like	0.00241896	0.00175509
rhoptry associated membrane antigen	0.0024176	0.0017541
endoplasmic reticulum metallopeptidase 1	0.00241138	0.00174958
bardet-biedl syndrome 4	0.00240477	0.00174479
ap3d1 protein	0.00240327	0.0017437
fucose-1-phosphate guanylyltransferase	0.00239923	0.00174077
protein lin- isoform b	0.00239425	0.00173716
bcl2-associated athanogene	0.00237954	0.00172648
dystrobrevin beta	0.00237361	0.00172218
huntingtin-interacting protein k	0.00237248	0.00172136
dual specificity mitogen-activated protein kinase kinase 2-like	0.0023678	0.00171796
lysosomal pro-x carboxypeptidase-like	0.00236518	0.00171607
phosphatidylcholine transfer protein	0.00235479	0.00170853
n-alpha-acetyltransferase auxiliary subunit	0.00235214	0.0017066
lectin 1a	0.00234875	0.00170415
protein cwc15 homolog	0.00234455	0.0017011
prickle2-like protein	0.00234192	0.00169919
chromosome 2 open reading frame 62	0.00234055	0.00169819
uroporphyrinogen decarboxylase-like	0.00233918	0.0016972
myocyte-specific enhancer factor 2c isoform 2	0.00233503	0.00169419
bifunctional atp-dependent dihydroxyacetone kinase fad-amp lyase	0.00233344	0.00169303
galactokinase 2	0.00233236	0.00169225
phosphoribosylformylglycinamidine synthase-like	0.002331	0.00169127
lambda-crystallin homolog	0.00232329	0.00168568
uroporphyrinogen decarboxylase	0.00231884	0.00168244
ubie5	0.00230415	0.00167178
chromosome 12 open reading frame 69	0.0023015	0.00166986
fbp32 precursor	0.00229885	0.00166794
transcription factor rfx3	0.00229508	0.00166521
low quality protein: water dikinase-like	0.00229489	0.00166507
g-protein coupled receptor 126-like	0.00229108	0.0016623
dbh-like monooxygenase protein 1 homolog	0.00228723	0.00165951
periodic tryptophan protein 1 homolog	0.00228194	0.00165567
sap domain-containing ribonucleoprotein	0.00227101	0.00164774
arginine and glutamate-rich protein 1	0.00226244	0.00164152
toxin tx1	0.00225819	0.00163844
structural maintenance of chromosomes protein 2	0.0022477	0.00163082
tpa: neurexin 2-like	0.00224719	0.00163046
dead (asp-glu-ala-asp) box polypeptide 47	0.00224517	0.00162899
dna polymerase epsilon subunit 3	0.00223774	0.0016236
nucleolysin tiar-like	0.00223214	0.00161954
protein tweety homolog 2-like	0.00223162	0.00161916
protein bicaudal d homolog 2-like	0.00223048	0.00161834
mitogen-activated protein kinase kinase 2	0.002228	0.00161653
chaperone activity of bc1 complex- mitochondrial-like	0.00222434	0.00161388
glutaredoxin 2	0.00222222	0.00161234
alternative splicing factor srp20	0.00221976	0.00161055
dynactin subunit 4 isoform 2	0.00221729	0.00160877
5 -amp-activated protein kinase subunit gamma-2	0.00220751	0.00160166
acyl-coenzyme a dehydrogenase member 9	0.00220751	0.00160166
protein alan shepard-like	0.0021978	0.00159462
riken cdna 2510012j08 gene	0.00219491	0.00159252
prolactin regulatory element binding	0.00219298	0.00159113
suppressor of g2 allele of skp1 homolog	0.00219178	0.00159025
achain crystal structure of the spoc domain of the human transcriptional	0.00218898	0.00158822
probable 28s ribosomal protein mitochondrial-like	0.00218616	0.00158618
wd-repeat protein	0.00218566	0.00158581
novel protein vertebrate dbh-like 1	0.00218338	0.00158416
chromosome 19 open reading frame 29	0.0021796	0.00158142
proprotein convertase subtilisin kexin type 6 precursor	0.00217924	0.00158116
islet cell autoantigen 1	0.00217865	0.00158073
long-chain-fatty-acid-- ligase acsbg2-like	0.00217313	0.00157672
sema immunoglobulin domain short basic 3f precursor	0.00216802	0.00157302
endou protein	0.00215983	0.00156707
saccharopine dehydrogenase	0.00215983	0.00156707
sphingosine-1-phosphate lyase 1	0.00215752	0.00156539
solute carrier organic anion transporter family member 4c1	0.0021575	0.00156538
islet cell autoantigen 1-like	0.00215332	0.00156235
hnrnp protein	0.00215054	0.00156033
1-acyl-sn-glycerol-3-phosphate acyltransferase delta	0.002149	0.00155921
cold inducible rna binding protein	0.00214823	0.00155865
tp53rk-binding protein	0.00214823	0.00155865
fact complex subunit ssrp1	0.00214746	0.0015581
si:dkey- protein	0.00214091	0.00155335
rab gtpase-binding effector protein 1	0.00213371	0.00154812
methylthioribose-1-phosphate isomerase-like	0.00212164	0.00153936
class b secretin-like g-protein coupled receptor	0.00211529	0.00153476
tricarboxylate transport mitochondrial-like	0.00211416	0.00153394
uncoordinated family member (unc-105)- partial	0.00211416	0.00153394
acyl- thioesterase 7	0.00210702	0.00152875
dna damage-binding protein 1	0.00209864	0.00152267
adp-dependent glucokinase	0.0020979	0.00152214
dis3-like exonuclease 2-like	0.00209706	0.00152153
39s ribosomal protein mitochondrial-like	0.00209205	0.00151789
slit homolog 1	0.00208031	0.00150938
neurobeachin isoform 2	0.00207469	0.0015053
lysosomal pro-x carboxypeptidase	0.00206868	0.00150094
u4 u6 small nuclear ribonucleoprotein prp3	0.00206186	0.00149599
upf0414 transmembrane protein c20orf30 homolog	0.00205833	0.00149343
protein cbfa2t1	0.00205664	0.0014922
chitinase [Capsaspora owczarzaki ATCC 30864]	0.0020558	0.00149159
glutamate-cysteine catalytic subunit	0.0020555	0.00149137
mgc80621 protein	0.00205481	0.00149088
cytoplasmic dynein 1 light intermediate chain 2-like	0.00205198	0.00148882
arf-gap with coiled- ank repeat and ph domain-containing protein 3	0.00204879	0.00148651
galactose-1-phosphate uridylyltransferase	0.00204778	0.00148578
chordin-like protein	0.00204657	0.0014849
eukaryotic peptide chain release factor gtp-binding subunit erf3a isoform 1	0.00204457	0.00148345
arabinose 5-phosphate isomerase	0.00204082	0.00148072
echinoderm microtubule associated protein like 1	0.002032	0.00147433
adipocyte plasma membrane-associated protein	0.00202759	0.00147113
receptor-type tyrosine-protein phosphatase alpha	0.00201579	0.00146256
ubx domain-containing protein 7	0.00201312	0.00146062
cbp4_ashgo ame: full=assembly factor cbp4 ame: full=cytochrome b mrna-processing protein 4	0.00200938	0.00145791
upf0317 protein c14orf159 mitochondrial-like	0.00199572	0.001448
centrin-3	0.00199402	0.00144677
polycystic kidney disease protein 2	0.00199353	0.00144641
nadh-cytochrome b5 reductase 3-like	0.00198965	0.0014436
protein amnionless precursor	0.00198314	0.00143888
protein virilizer homolog	0.00198183	0.00143793
gamma-interferon-inducible lysosomal thiol reductase precursor	0.0019802	0.00143674
mrna-decapping enzyme 1b	0.00197726	0.00143461
mannose-1-phosphate guanyltransferase alpha	0.00197368	0.00143201
rbl1 partial	0.00197239	0.00143107
nadh-cytochrome b5 reductase 3	0.00197083	0.00142994
ubiquitin-like-conjugating enzyme atg10	0.00196175	0.00142335
atp-binding sub-family b (mdr tap) member 1	0.00196078	0.00142265
dbh-like 1	0.00195632	0.00141942
calbindin-32	0.00195567	0.00141894
[truncated: 823 more rows]

## Sheet: S5C)JellyOM_at_32h_84h
	Blast annotation	PSM/AA_at0h	PSM/AA_at32h	PSM/AA_at84h	as % of jellyOM	as % of jellyOM at 32h	as % of jellyOM at 84h
	actin	1.77688	0.00693642	0.00520231	0.873356	0.124775	3.91705
	actin	0	0.0342205	0.026616	0	0.615573	20.0403
	actin	0.972973	0.0173745	0.0135135	0.478227	0.31254	10.1749
	actin	1.72309	0.00672646	0.00504484	0.846921	0.120998	3.79848
	actin	0	0.0047619	0	0	0.0856592	0
	apical endosomal glycoprotein	0.0283019	0.00314465	0	0.0139107	0.0565674	0
	apical endosomal glycoprotein	0.0172712	0.00345423	0	0.00848897	0.0621362	0
	astacin family metalloendopeptidase	0.0140625	0.0015625	0	0.00691188	0.0281069	0
	astacin family metalloendopeptidase	0.0194805	0.0021645	0	0.0095749	0.038936	0
	astacin family metalloendopeptidase	0.0229592	0.00255102	0	0.0112847	0.0458888	0
	HSPG protein	0	0	0.00287253	0	0	2.16285
	HSPG protein	0	0.00178811	0	0	0.0321653	0
	beta-glucuronidase-like	0	0.00290065	0	0	0.0521782	0
	carboxypeptidase D-like	0.00220361	0.000881446	0	0.0010831	0.0158558	0
	chitinase enzyme	0.0558476	0.00065703	0	0.0274497	0.0118189	0
	chymotrypsin-like elastase family	0	0.00120482	0	0	0.0216728	0
	chymotrypsin-like elastase family	0.0347448	0.0206298	0	0.0170775	0.371097	0
	collagen alpha chain	0.103861	0.0635643	0	0.0510489	1.14342	0
	collagen alpha chain	0	0.0639634	0	0	1.1506	0
	collagen alpha chain	0.0988019	0.0279562	0	0.0485623	0.502889	0
	collagen alpha chain	0.0213561	0.00106781	0	0.0104968	0.0192081	0
	collagen alpha chain	0.00660689	0.00613497	0	0.00324736	0.110358	0
	collagen alpha chain	0	0.0172706	0	0	0.31067	0
	collagen alpha chain	0.0870565	0.0146531	0	0.0427893	0.263586	0
	collagen alpha chain	0.124418	0.0149115	0	0.0611527	0.268234	0
	collagen alpha chain	0.125647	0.0150588	0	0.061757	0.270884	0
	collagen alpha chain	0.106358	0.00423892	0	0.0522764	0.0762515	0
	contactin-like	0	0.000196155	0	0	0.00352853	0
	contactin-like	0.0114679	0.00458716	0	0.0056366	0.0825157	0
	Cu/Zn superoxide dismutase	0.0565093	0.0118026	0	0.027775	0.21231	0
	Cu/Zn superoxide dismutase	0	0.0115871	0	0	0.208433	0
	Cu/Zn superoxide dismutase	0.054823	0.0114504	0	0.0269462	0.205974	0
	Cu/Zn superoxide dismutase	0.0510336	0.0106589	0	0.0250836	0.191737	0
	Cu/Zn superoxide dismutase	0.0368127	0.00768872	0	0.0180939	0.138308	0
	Cu/Zn superoxide dismutase	0	0.00762829	0	0	0.137221	0
	cubilin precursor	0.0602606	0.00162866	0	0.0296188	0.0292971	0
	cysteine rich BMP regulator 2 precursor	0	0.0015015	0	0	0.0270096	0
	cysteine rich BMP regulator 2 precursor	0	0.00677392	0	0	0.121852	0
	cysteine-rich motor neuron 1	0.0235586	0.0049597	0	0.0115793	0.0892172	0
	death-associated protein kinase 3	0.217709	0.0300569	0	0.107007	0.540676	0
	deoxyribonuclease ii	0.00131291	0.000437637	0	0.000645311	0.0078724	0
	deoxyribonuclease ii	0.00455996	0.00182399	0	0.00224127	0.0328106	0
	elastase-like serine protease	0.0292208	0.00974026	0	0.0143624	0.175212	0
	elongation factor 1 alpha	0.229567	0.00120192	0	0.112835	0.0216207	0
	extracellular matrix protein 3-like	0.0123839	0.00619195	0	0.00608683	0.111383	0
	ferritin high chain	0.0531335	0.0020436	0	0.0261157	0.0367611	0
	ferritin high chain	0.0543554	0.00209059	0	0.0267163	0.0376065	0
	ferritin high chain	0.0947752	0.0036452	0	0.0465831	0.0655714	0
	fibrillin-like	0.442348	0.0272537	0	0.217419	0.490251	0
	fibrillin-like	0.18254	0.0119048	0	0.0897204	0.214148	0
	fibrillin-like	1.01052	0.0315552	0	0.496682	0.567629	0
	fibrillin-like	1.01052	0.0315552	0	0.496682	0.567629	0
	fibrillin-like	0.363844	0.00686499	0	0.178834	0.12349	0
	fibrillin-like	0.689826	0.0223325	0	0.339058	0.401727	0
	fibrillin-like	1.01052	0.0315552	0	0.496682	0.567629	0
	fibrillin-like	0.509182	0.015025	0	0.250269	0.270277	0
	fibrillin-like	0.537919	0.015873	0	0.264393	0.285531	0
	fibrillin-like	0.0155922	0.0005997	0	0.00766375	0.0107877	0
	fibrillin-like	0	0.0110694	0	0	0.199121	0
	fibrillin-like	0	0.0119048	0	0	0.214148	0
	fibrillin-like	0.1998	0.0028	0	0.098204	0.0503676	0
	fibrillin-like	0.209346	0.00293378	0	0.102896	0.0527741	0
	fibrillin-like	0.333713	0.00797267	0	0.164024	0.143416	0
	fibrillin-like	0.39403	0.00895522	0	0.19367	0.16109	0
	filamin-like	0.252725	0.0530217	0	0.124217	0.953777	0
	gamma-glutamyltranspeptidase 1-like	0.012285	0.0019656	0	0.00603823	0.0353581	0
	gamma-glutamyltranspeptidase 1-like	0	0.0019685	0	0	0.0354103	0
	gamma-glutamyltranspeptidase 1-like	0.0126839	0.00202943	0	0.00623429	0.0365062	0
	gamma-glutamyltranspeptidase 1-like	0	0.00203252	0	0	0.0365618	0
	glutamate carboxypeptidase 2	0.00667408	0.00259548	0	0.00328039	0.0466885	0
	glutathione peroxidase	0.00254194	0.00254194	0	0.00124939	0.0457255	0
	glutathione peroxidase	0.00285388	0.00285388	0	0.00140272	0.0513368	0
	glutathione S-transferase-like	0.0147951	0.00113809	0	0.00727198	0.0204724	0
	glyoxalase bleomycin resistance protein dioxygenase	0.00347625	0.0023175	0	0.00170862	0.0416881	0
	glyoxalase bleomycin resistance protein dioxygenase	0.00358423	0.00238949	0	0.00176169	0.0429831	0
	GPI ethanolamine phosphate transferase 3	0	0.000809061	0	0	0.0145537	0
	GPI ethanolamine phosphate transferase 3	0	0.00087604	0	0	0.0157586	0
	granulin	0.00463607	0.00533148	0.00162262	0.00227868	0.0959049	1.22174
	granulin	0.00524934	0.00603675	0.00183727	0.00258011	0.108592	1.38336
	hemicentin-2	0	0	0.013289	0	0	10.0059
	hydrolase	0.00680272	0.00170068	0	0.00334362	0.0305926	0
	hydroxyacylglutathione hydrolase, mitochondrial-like	0.0078125	0.000710227	0	0.00383993	0.0127759	0
	hydroxyacylglutathione hydrolase, mitochondrial-like	0.0091135	0.0008285	0	0.00447939	0.0149034	0
	hydroxyacylglutathione mitochondrial-like	0.00645919	0.000587199	0	0.00317477	0.0105628	0
	hydroxyacylglutathione mitochondrial-like	0.00744249	0.00067659	0	0.00365807	0.0121708	0
	iii-fbpl precursor	0.0484988	0.0161663	0	0.0238377	0.290806	0
	integrin-like	0.0149909	0.000731261	0	0.00736818	0.0131542	0
	integrin-like	0.0151069	0.00073692	0	0.00742519	0.013256	0
	integrin-like	0	0.00114548	0	0	0.0206053	0
	integrin-like	0.0022309	0.00111545	0	0.00109651	0.0200652	0
	integrin-like	0	0.00121581	0	0	0.0218704	0
	lactotransferrin	0.0502283	0.00228311	0	0.0246878	0.0410695	0
	laminin-like	0.0261176	0.00211765	0	0.0128371	0.0380931	0
	laminin-like	0.0509854	0.000361598	0	0.0250599	0.00650458	0
	latent-transforming growth factor beta-binding protein 4	0.156997	0.0102389	0	0.0771656	0.184182	0
	lectin	0	0.024055	0	0	0.432711	0
	lysosomal alpha-mannosidase-like	0.0109607	0.00644745	0	0.0053873	0.11598	0
	MAM&LDL-receptor class A domain-containing protein 1-like	0.00373636	0.000149454	0	0.00183647	0.00268845	0
	mam domain-containing protein 2-like	0.021097	0.00421941	0	0.0103694	0.0759005	0
	matrix metalloproteinase 9	0.036961	0.0143737	0	0.0181668	0.258561	0
	melanotransferrin	0.0332574	0.00182232	0	0.0163464	0.0327807	0
	melanotransferrin	0.0164863	0.00206079	0	0.00810323	0.0370704	0
	mesoglein	0	0.000457875	0	0	0.00823646	0
	mesoglein	0	0.000469704	0	0	0.00844924	0
	mesoglein	0.0120337	0.00361011	0	0.0059147	0.0649402	0
	mesoglein	0.666023	0.041184	0.000643501	0.327358	0.740836	0.48452
	microfibril-associated glycoprotein-like	0	0.00329489	0	0	0.0592699	0
	microfibril-associated glycoprotein-like	0	0.00824742	0	0	0.148358	0
	microfibril-associated glycoprotein-like	0	0.00333056	0	0	0.0599115	0
	M-phase inducer phosphatase-like	0	0	0.000363504	0	0	0.273698
	N-acetylated-alpha-linked acidic dipeptidase	0	0.00426309	0	0	0.0766863	0
	neural cell adhesion molecule 2	0.0373092	0.000376861	0	0.0183379	0.00677913	0
	neurexin-4	0.00289256	0.00165289	0	0.00142173	0.0297329	0
	neurexin-4	0.00299786	0.00171306	0	0.00147348	0.0308153	0
	neurexin-4	0.00329877	0.00188501	0	0.00162139	0.0339084	0
	neurocalcin homolog	0.0768421	0.00315789	0	0.0377688	0.0568055	0
	neurocalcin homolog	0.0768421	0.00315789	0	0.0377688	0.0568055	0
	non-ribosomal peptide synthetase	0	3.03865	0	0	54.6605	0
	nucleoside diphosphate kinase b	0.606013	0.00632911	0	0.297862	0.113851	0
	peroxidasin	0.00303951	0.00173686	0	0.00149396	0.0312435	0
	peroxidasin	0.00283057	0.00161747	0	0.00139126	0.0290957	0
	peroxiredoxin 1	0.140659	0.00549451	0	0.0691357	0.0988375	0
	peroxiredoxin 4	0.129518	0.00401606	0	0.0636596	0.0722427	0
	phospholipid scramblase-like	0.0109141	0.00136426	0	0.00536438	0.0245408	0
	plasminogen-like	0	0.00623886	0	0	0.112227	0
	poly -specific endoribonuclease-like	0.141414	0.00673401	0	0.0695067	0.121134	0
	poly -specific endoribonuclease-like	0.141414	0.00673401	0	0.0695067	0.121134	0
	poly -specific endoribonuclease-like	0.0583501	0.00201207	0	0.0286798	0.036194	0
	poly -specific endoribonuclease-like	0.0602285	0.00207684	0	0.029603	0.0373591	0
	poly -specific endoribonuclease-like	0	0.00696864	0	0	0.125355	0
	poly -specific endoribonuclease-like	0	0.00199005	0	0	0.0357979	0
	poly -specific endoribonuclease-like	0	0.00391389	0	0	0.0704048	0
	poly -specific endoribonuclease-like	0	0.00468384	0	0	0.0842549	0
	poly -specific endoribonuclease-like	0	0.00673401	0	0	0.121134	0
	poly -specific endoribonuclease-like	0	0.00696864	0	0	0.125355	0
	poly-gamma-glutamate synthase PgsB	0	0	0.00292398	0	0	2.20159
	polyubiquitin-like	0	0.0811966	0	0	1.4606	0
	prostaglandin hematopoietic-like	0.0689942	0.00249377	0	0.0339114	0.0448589	0
	receptor-type tyrosine-protein phosphatase s-like	0.0185185	0.000903342	0	0.00910207	0.0162497	0
	receptor-type tyrosine-protein phosphatase s-like	0.0185773	0.000906208	0	0.00913094	0.0163012	0
	receptor-type tyrosine-protein phosphatase s-like	0.0186448	0.000909504	0	0.00916415	0.0163605	0
	roundabout homolog 1-like	0	0	0.016	0	0	12.0471
	serine protease	0.0207101	0.00591716	0	0.0101792	0.10644	0
	serine protease	0.0325397	0.0373016	0	0.0159936	0.670997	0
	serine protease	0.0317092	0.0363496	0	0.0155854	0.653872	0
	serine protease	0.0310559	0.0310559	0	0.0152643	0.558647	0
	serine protease	0.0617696	0.0784641	0	0.0303605	1.41145	0
	serine protease	0.065371	0.0830389	0	0.0321306	1.49374	0
	serine protease	0.00472879	0.000556328	0	0.00232426	0.0100075	0
	serine protease inhibitor	0	0.0097561	0	0	0.175497	0
	serpin-like	0.0042005	0.00280034	0	0.0020646	0.0503736	0
	sister chromatid cohesion protein dcc1	0.0251799	0.00119904	0	0.0123762	0.0215689	0
	sodium/bile acid cotransporter 7-like	0	0.000857265	0	0	0.0154209	0
	sodium/bile acid cotransporter 7-like	0	0.000866927	0	0	0.0155946	0
	sodium/bile acid cotransporter 7-like	0.00130662	0.00087108	0	0.000642219	0.0156694	0
	sodium/bile acid cotransporter 7-like	0	0.000881057	0	0	0.0158488	0
	sodium/bile acid cotransporter 7-like	0.00132333	0.000882223	0	0.000650434	0.0158698	0
	sodium/bile acid cotransporter 7-like	0.00133156	0.000887705	0	0.000654476	0.0159684	0
	sodium/bile acid cotransporter 7-like	0	0.000892459	0	0	0.0160539	0
	sodium/bile acid cotransporter 7-like	0.00134529	0.000896861	0	0.000661226	0.0161331	0
	sodium/bile acid cotransporter 7-like	0.0013471	0.000898069	0	0.000662117	0.0161548	0
	sodium/bile acid cotransporter 7-like	0.00135379	0.000902527	0	0.000665404	0.016235	0
	sodium/bile acid cotransporter 7-like	0.00136986	0.000913242	0	0.000673304	0.0164278	0
	sodium/bile acid cotransporter 7-like	0	0.000933707	0	0	0.0167959	0
	sodium/bile acid cotransporter 7-like	0	0.000938527	0	0	0.0168826	0
	soma ferritin-like	0.0396772	0.0188299	0	0.0195018	0.338719	0
	selectin-like osteoblast-derived protein	0	0.00431034	0	0	0.0775363	0
	tf-b protein	0.0351351	0.0189189	0	0.0172693	0.340322	0
	thrombin inhibitor	0.00912987	0.00149059	0	0.00448744	0.0268134	0
	thrombospondin type 1 repeat-containing protein	0.0202122	0.00101061	0	0.00993454	0.0181793	0
	titin-like	0	0	0.012605	0	0	9.49088
	titin-like	0	0	0.0110294	0	0	8.30452
	transmembrane protease serine 6-like	0.00469354	0.000552181	0	0.00230693	0.00993287	0
	tubulin alpha-chain- partial	0.23374	0.00101626	0	0.114886	0.0182809	0
	tubulin alpha-chain- partial	0.254425	0.00110619	0	0.125053	0.0198987	0
	ubiquitin	0.865854	0.0772358	0	0.425577	1.38935	0
	ubiquitin	0.865854	0.0772358	0	0.425577	1.38935	0
	ubiquitin	0	0.0892019	0	0	1.6046	0
	ubiquitin	0.865854	0.0772358	0	0.425577	1.38935	0
	ubiquitin	0.18894	0.00460829	0	0.0928662	0.082896	0
	ubiquitin	0	0.087963	0	0	1.58232	0
	ubiquitin	0	0.0904762	0	0	1.62752	0
	ubiquitin	0.535503	0.00295858	0	0.263206	0.0532202	0
	ubiquitin	0.910256	0.0811966	0	0.447402	1.4606	0
	ubiquitin	0.910256	0.0811966	0	0.447402	1.4606	0
	ubiquitin	0.79386	0.00438596	0	0.390191	0.0788966	0
	ubiquitin	0.417476	0.0436893	0	0.205194	0.785902	0
	ubiquitin	0.811321	0.0849057	0	0.398774	1.52732	0
	ubiquitin a-52 residue ribosomal protein fusion product 1	0.630357	0.0339286	0	0.309828	0.610322	0
	ubiquitin carboxyl-terminal hydrolase isozyme-like	0	0	0.00105042	0	0	0.790907
	ubiquitin carboxyl-terminal hydrolase isozyme-like	0	0	0.00107643	0	0	0.810488
	ubiquitin ribosomal protein s27a fusion protein	0.543988	0.0278592	0	0.267377	0.501144	0
	uncharacterized protein	0	0.00420168	0	0	0.0755816	0
	uncharacterized protein	0.0148716	0.00463529	0	0.00730955	0.0833816	0
	uncharacterized protein	3.7191	0.00842697	0.00561798	1.82798	0.151588	4.23002
	uncharacterized protein	0.0737705	0.0519126	0	0.0362591	0.933825	0
	uncharacterized protein	0	0	0.0026178	0	0	1.97106
	uncharacterized protein	0	0	0.00278552	0	0	2.09734
	uncharacterized protein	0	0.00142349	0	0	0.0256063	0
	uncharacterized protein	0	0.00160643	0	0	0.0288971	0
	uncharacterized protein	0	0.00189394	0	0	0.034069	0
	uncharacterized protein	0	0.00310559	0	0	0.0558647	0
	uncharacterized protein	0.193396	0.00471698	0	0.0950565	0.0848511	0
	uncharacterized protein	0.0189394	0.0151515	0	0.00930893	0.272552	0
	uncharacterized protein	0.0142566	0.0325866	0	0.00700729	0.586181	0
	uncharacterized protein	0	0	0.000506329	0	0	0.381237
	uncharacterized protein	0	0	0.000809061	0	0	0.609178
	uncharacterized protein	0	0.0015456	0	0	0.0278028	0
	uncharacterized protein	0.00545596	0.00155885	0	0.00268167	0.0280412	0
	uncharacterized protein	0.00980392	0.00280112	0	0.00481874	0.0503877	0
	uncharacterized protein	0.00301984	0.00172563	0	0.00148429	0.0310413	0
	uncharacterized protein	0.00351053	0.00200602	0	0.00172547	0.0360851	0
	uncharacterized protein	0	0	0.00172117	0	0	1.29594
	uncharacterized protein	0	0.00270563	0	0	0.04867	0
	uncharacterized protein	0	0.00345586	0	0	0.0621655	0
	uncharacterized protein	0	0	0.000417537	0	0	0.314381
	uncharacterized protein	0	0	0.000530504	0	0	0.39944
	uncharacterized protein	0	0	0.00083682	0	0	0.630078
	von Willebrand factor A domain-containing protein 7-like	0	0	0.000379363	0	0	0.285639
	von Willebrand factor A domain-containing protein 7-like	0	0	0.000401123	0	0	0.302023
	von Willebrand factor A domain-containing protein 7-like	0	0	0.000498504	0	0	0.375346
	WASH complex subunit FAM21C-like	0	0.00078637	0	0	0.0141455	0
	WASH complex subunit FAM21C-like	0	0.000629063	0	0	0.0113158	0
	WASH complex subunit FAM21C-like	0	0.000696864	0	0	0.0125355	0
	zinc finger ZZ-type and EF-hand domain-containing protein 1-like	0.000637653	0.00318827	0	0.000313414	0.0573519	0
	zinc finger ZZ-type and EF-hand domain-containing protein 1-like	0.000646308	0.00323154	0	0.000317668	0.0581303	0
	zinc finger ZZ-type and EF-hand domain-containing protein 1-like	0	0.0032515	0	0	0.0584894	0
	zinc finger ZZ-type and EF-hand domain-containing protein 1-like	0	0.00329652	0	0	0.0592992	0
	zinc finger ZZ-type and EF-hand domain-containing protein 1-like	0.000681315	0.00340657	0	0.000334874	0.0612789	0
	zinc finger ZZ-type and EF-hand domain-containing protein 1-like	0.000691204	0.00345602	0	0.000339735	0.0621684	0
	zinc metalloproteinase nas-14	0	0.00314136	0	0	0.0565081	0
	zinc metalloproteinase nas-14	0	0.00044843	0	0	0.00806656	0
	zinc metalloproteinase nas-14	0	0.000472701	0	0	0.00850315	0
	zinc metalloproteinase nas-14	0	0.000737191	0	0	0.0132609	0
	zinc metalloproteinase nas-14	0	0.000805153	0	0	0.0144834	0
	SUM PSM/AA	29.6692	5.55913	0.132812
	as % of initial jellyOM				14.5828	2.73238	0.0652787
